# Supplementary material for: Azobenzene molecular glasses with tuned glass transition temperatures: from optimal light-induced motion to self-erasable gratings
Source: Royal Society of Chemistry journal article supplement (doi:10.1039/d0tc00393j), 2020-01-01

## Supporting Information

### Synthesis and characterization of azobenzene molecular glasses with different glass transition temperatures

Austin Diggins<sup>a</sup>, Eoin Dawson<sup>a</sup>, Mahnaz Kamaliardakani<sup>b</sup>, Christian Pellerin<sup>b</sup>, Ribal Georges Sabat<sup>a</sup>  
and Olivier Lebel<sup>c</sup>

<sup>a</sup> Department of Physics and Space Science, Royal Military College of Canada, PO Box 17000, Station  
Forces Kingston, Ontario CANADA, K7K 7B4

<sup>b</sup> Département de chimie, Université de Montréal, C.P. 6128, succursale Centre-ville, Montréal,  
Québec, CANADA, H3C 3J7

<sup>c</sup> Department of Chemistry and Chemical Engineering, Royal Military College of Canada, PO Box  
17000, Station Forces Kingston, Ontario CANADA, K7K 7B4

\*Corresponding author: [c.pellerin@umontreal.ca](mailto:c.pellerin@umontreal.ca), [sabat@rmc.ca](mailto:sabat@rmc.ca), [Olivier.Lebel@rmc.ca](mailto:Olivier.Lebel@rmc.ca)

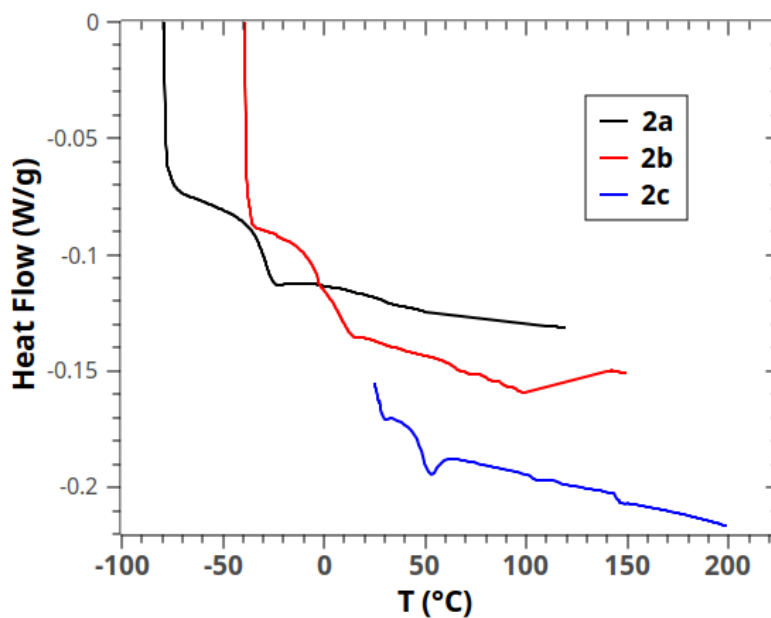

**Figure S1.** DSC thermograms of precursors **2a-c**. The thermograms were recorded at a heating rate of 5 °C/min after a preliminary heating run to erase the thermal history. Exotherms are facing up.

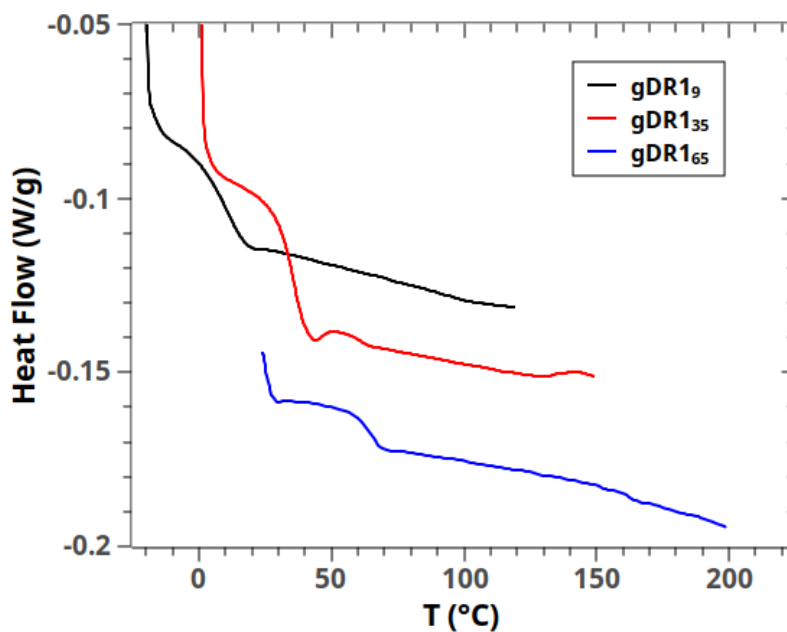

**Figure S2.** DSC thermograms of **gDR1<sub>9</sub>**, **gDR1<sub>35</sub>** and **gDR1<sub>65</sub>**. The thermograms were recorded at a heating rate of 5 °C/min after a preliminary heating run to erase the thermal history. Exotherms are facing up.

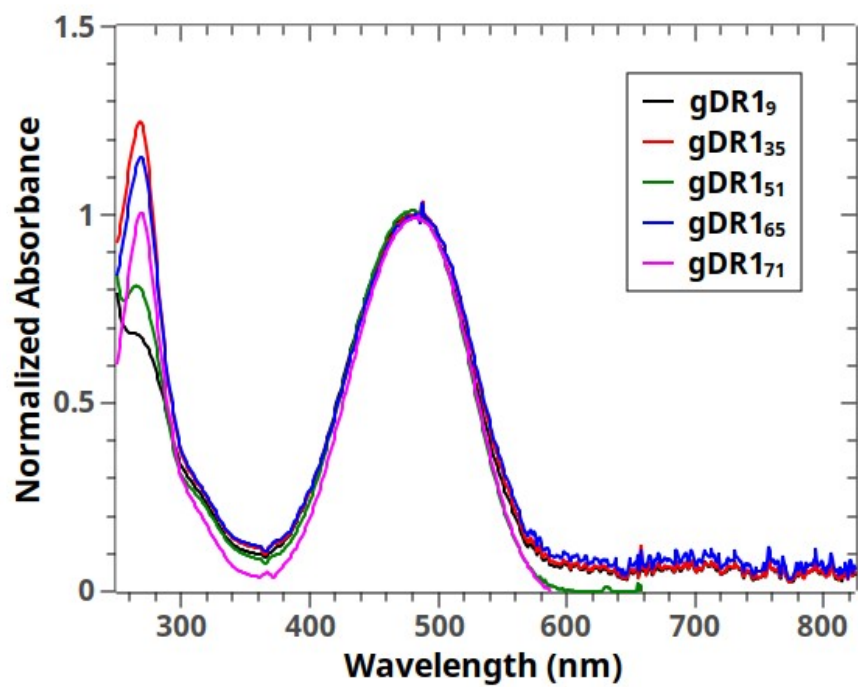

**Figure S3.** Normalized UV-Visible spectra of the different gDR1<sub>Tg</sub> analogues used in the present study. Spectra were recorded in 0.01 mM solution in CH<sub>2</sub>Cl<sub>2</sub>.

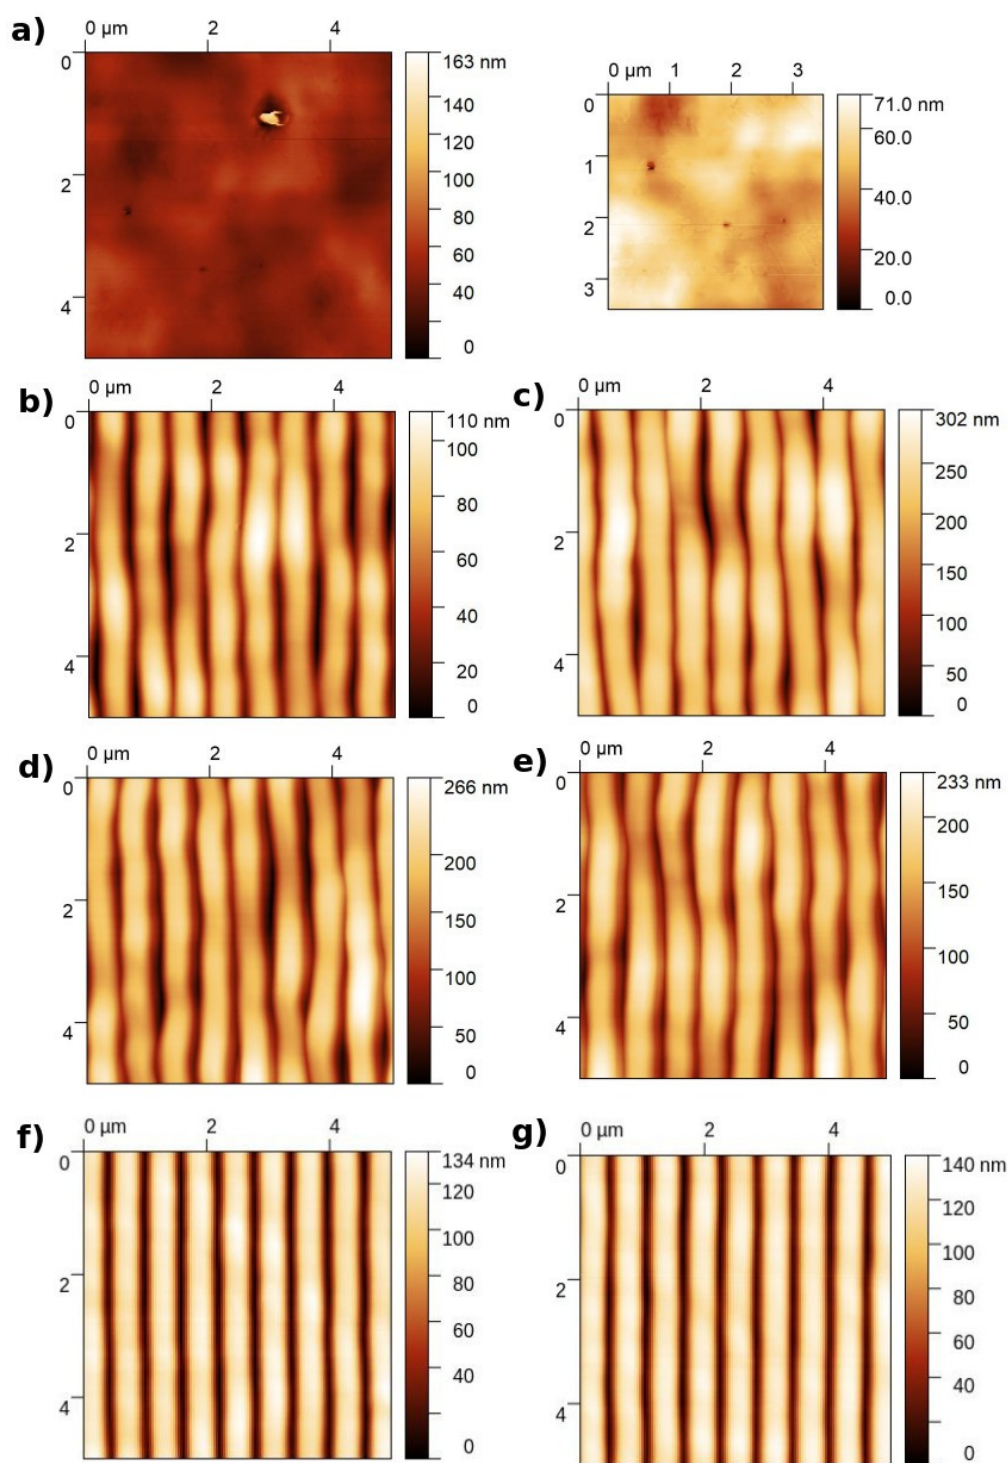

**Figure S4.** Atomic Force Microscopy (AFM) scans of thin films of **gDR1<sub>Tg</sub>** after irradiation with a 488 nm laser at an irradiance of 100 mW/cm<sup>2</sup>. (a) **gDR1<sub>9</sub>** after 200 s irradiation; (b) **gDR1<sub>35</sub>** after 200 s irradiation; (c) **gDR1<sub>51</sub>** after 600 s irradiation; (d) **gDR1<sub>65</sub>** after 600 s irradiation; (e) **gDR1<sub>71</sub>** after 800 s irradiation; (f) **gDR1<sub>65</sub>** after 60 irradiation (at 300 mW/cm<sup>2</sup>); (g) **gDR1<sub>71</sub>** after 150 s irradiation. The AFM scan for **gDR1<sub>9</sub>** was recorded 2 h after irradiation was stopped. A cropped image where the surface defect is not shown is also included for (a). The images in (b)-(e) likely show a distortion of the gratings due to the longer irradiation times, as the gratings shown in images (f)-(g), which had not yet reached saturation, do not show such defects.

**Table S1.** Initial SRG inscription rates for **gDR1<sub>Tg</sub>** with a 488-nm laser, obtained from the linear regression of the DE plots in Figure 1, before they plateaued.

| Compound                 | Irradiance (mW/cm <sup>2</sup> ) | Inscription rate (DE %/s) |                        |
|--------------------------|----------------------------------|---------------------------|------------------------|
| <b>gDR1<sub>9</sub></b>  | 100                              | 0.01226                   | $\pm 8 \times 10^{-5}$ |
|                          | 200                              | 0.0248                    | $\pm 2 \times 10^{-4}$ |
|                          | 300                              | 0.0338                    | $\pm 8 \times 10^{-4}$ |
| <b>gDR1<sub>35</sub></b> | 100                              | 0.01514                   | $\pm 5 \times 10^{-5}$ |
|                          | 200                              | 0.0405                    | $\pm 2 \times 10^{-4}$ |
|                          | 300                              | 0.044                     | $\pm 1 \times 10^{-3}$ |
| <b>gDR1<sub>51</sub></b> | 100                              | 0.0680                    | $\pm 1 \times 10^{-4}$ |
|                          | 200                              | 0.1417                    | $\pm 6 \times 10^{-4}$ |
|                          | 300                              | 0.0752                    | $\pm 7 \times 10^{-4}$ |
| <b>gDR1<sub>65</sub></b> | 100                              | 0.0666                    | $\pm 1 \times 10^{-4}$ |
|                          | 200                              | 0.1395                    | $\pm 5 \times 10^{-4}$ |
|                          | 300                              | 0.151                     | $\pm 1 \times 10^{-3}$ |
| <b>gDR1<sub>71</sub></b> | 100                              | 0.0575                    | $\pm 1 \times 10^{-4}$ |
|                          | 200                              | 0.1149                    | $\pm 3 \times 10^{-4}$ |
|                          | 300                              | 0.202                     | $\pm 1 \times 10^{-3}$ |

**Table S2.** Initial SRG inscription rates for **gDR1<sub>Tg</sub>** with a 532-nm laser, obtained from the linear regression of the DE plots in Figure 1, before they plateaued.

| Compound                 | Irradiance (mW/cm <sup>2</sup> ) | Inscription rate (DE %/s) |                        |
|--------------------------|----------------------------------|---------------------------|------------------------|
| <b>gDR1<sub>9</sub></b>  | 100                              | 0.00272                   | $\pm 2 \times 10^{-5}$ |
|                          | 200                              | 0.00175                   | $\pm 5 \times 10^{-5}$ |
|                          | 300                              | 0.0112                    | $\pm 1 \times 10^{-4}$ |
| <b>gDR1<sub>35</sub></b> | 100                              | 0.01279                   | $\pm 3 \times 10^{-5}$ |
|                          | 200                              | 0.0298                    | $\pm 2 \times 10^{-4}$ |
|                          | 300                              | 0.02655                   | $\pm 9 \times 10^{-5}$ |
| <b>gDR1<sub>51</sub></b> | 100                              | 0.0532                    | $\pm 1 \times 10^{-4}$ |
|                          | 200                              | 0.0748                    | $\pm 3 \times 10^{-4}$ |
|                          | 300                              | 0.0708                    | $\pm 2 \times 10^{-4}$ |
| <b>gDR1<sub>65</sub></b> | 100                              | 0.05366                   | $\pm 6 \times 10^{-5}$ |
|                          | 200                              | 0.0926                    | $\pm 3 \times 10^{-4}$ |
|                          | 300                              | 0.092                     | $\pm 3 \times 10^{-3}$ |
| <b>gDR1<sub>71</sub></b> | 100                              | 0.05014                   | $\pm 7 \times 10^{-5}$ |
|                          | 200                              | 0.0846                    | $\pm 2 \times 10^{-4}$ |
|                          | 300                              | 0.0762                    | $\pm 2 \times 10^{-4}$ |

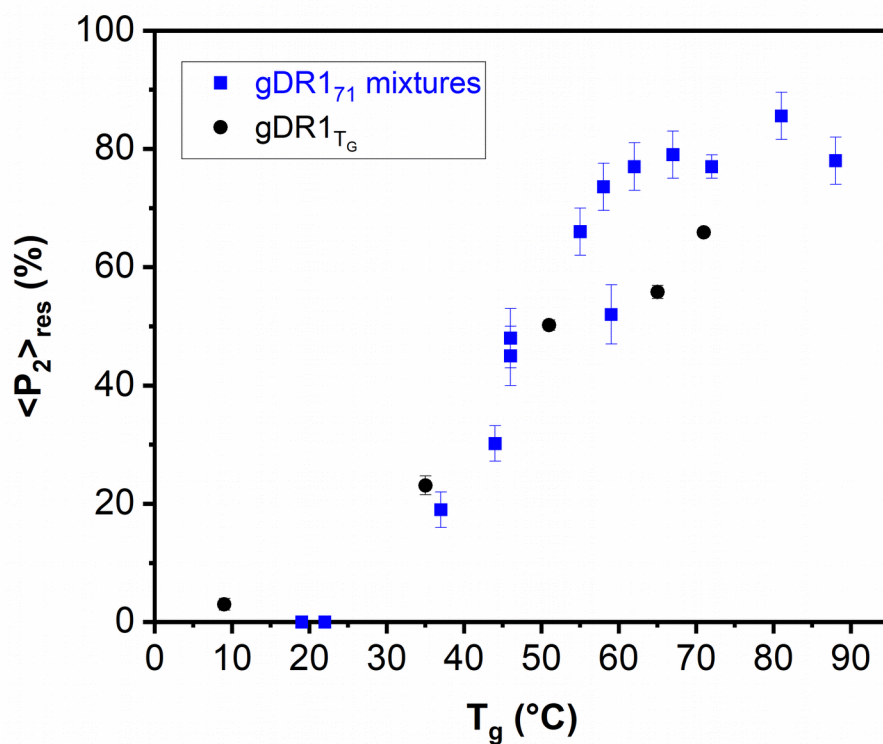

**Figure S5.** Effect of the glass transition temperature ( $T_g$ ) on the residual orientation parameter ( $\langle P_2 \rangle_{\text{res}}$ ) for pure gDR1<sub>T<sub>G</sub></sub> azo glasses (black) and for mixtures of azo glass gDR1<sub>71</sub> with photopassive glasses (blue). Similar trends are found for both cases. The mixtures results are reproduced from Ref. 24.

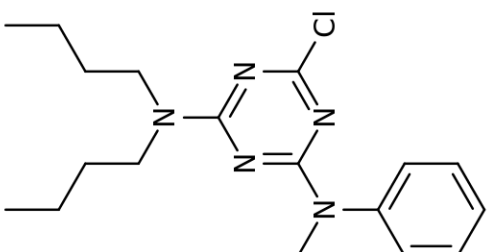

**1a**

7.348  
7.257  
7.238  
7.206

1.506  
1.387  
1.298  
1.279  
1.107  
0.909  
0.801

3.459  
3.218

1.9

1.0

4.8

1.7

2.3

2.4

1.8

1.8

3.3

2.7

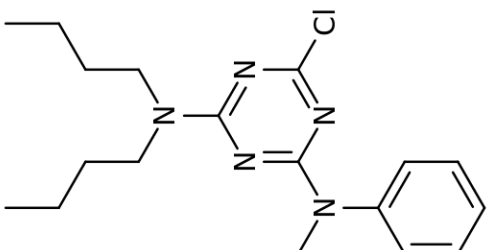

**1a**

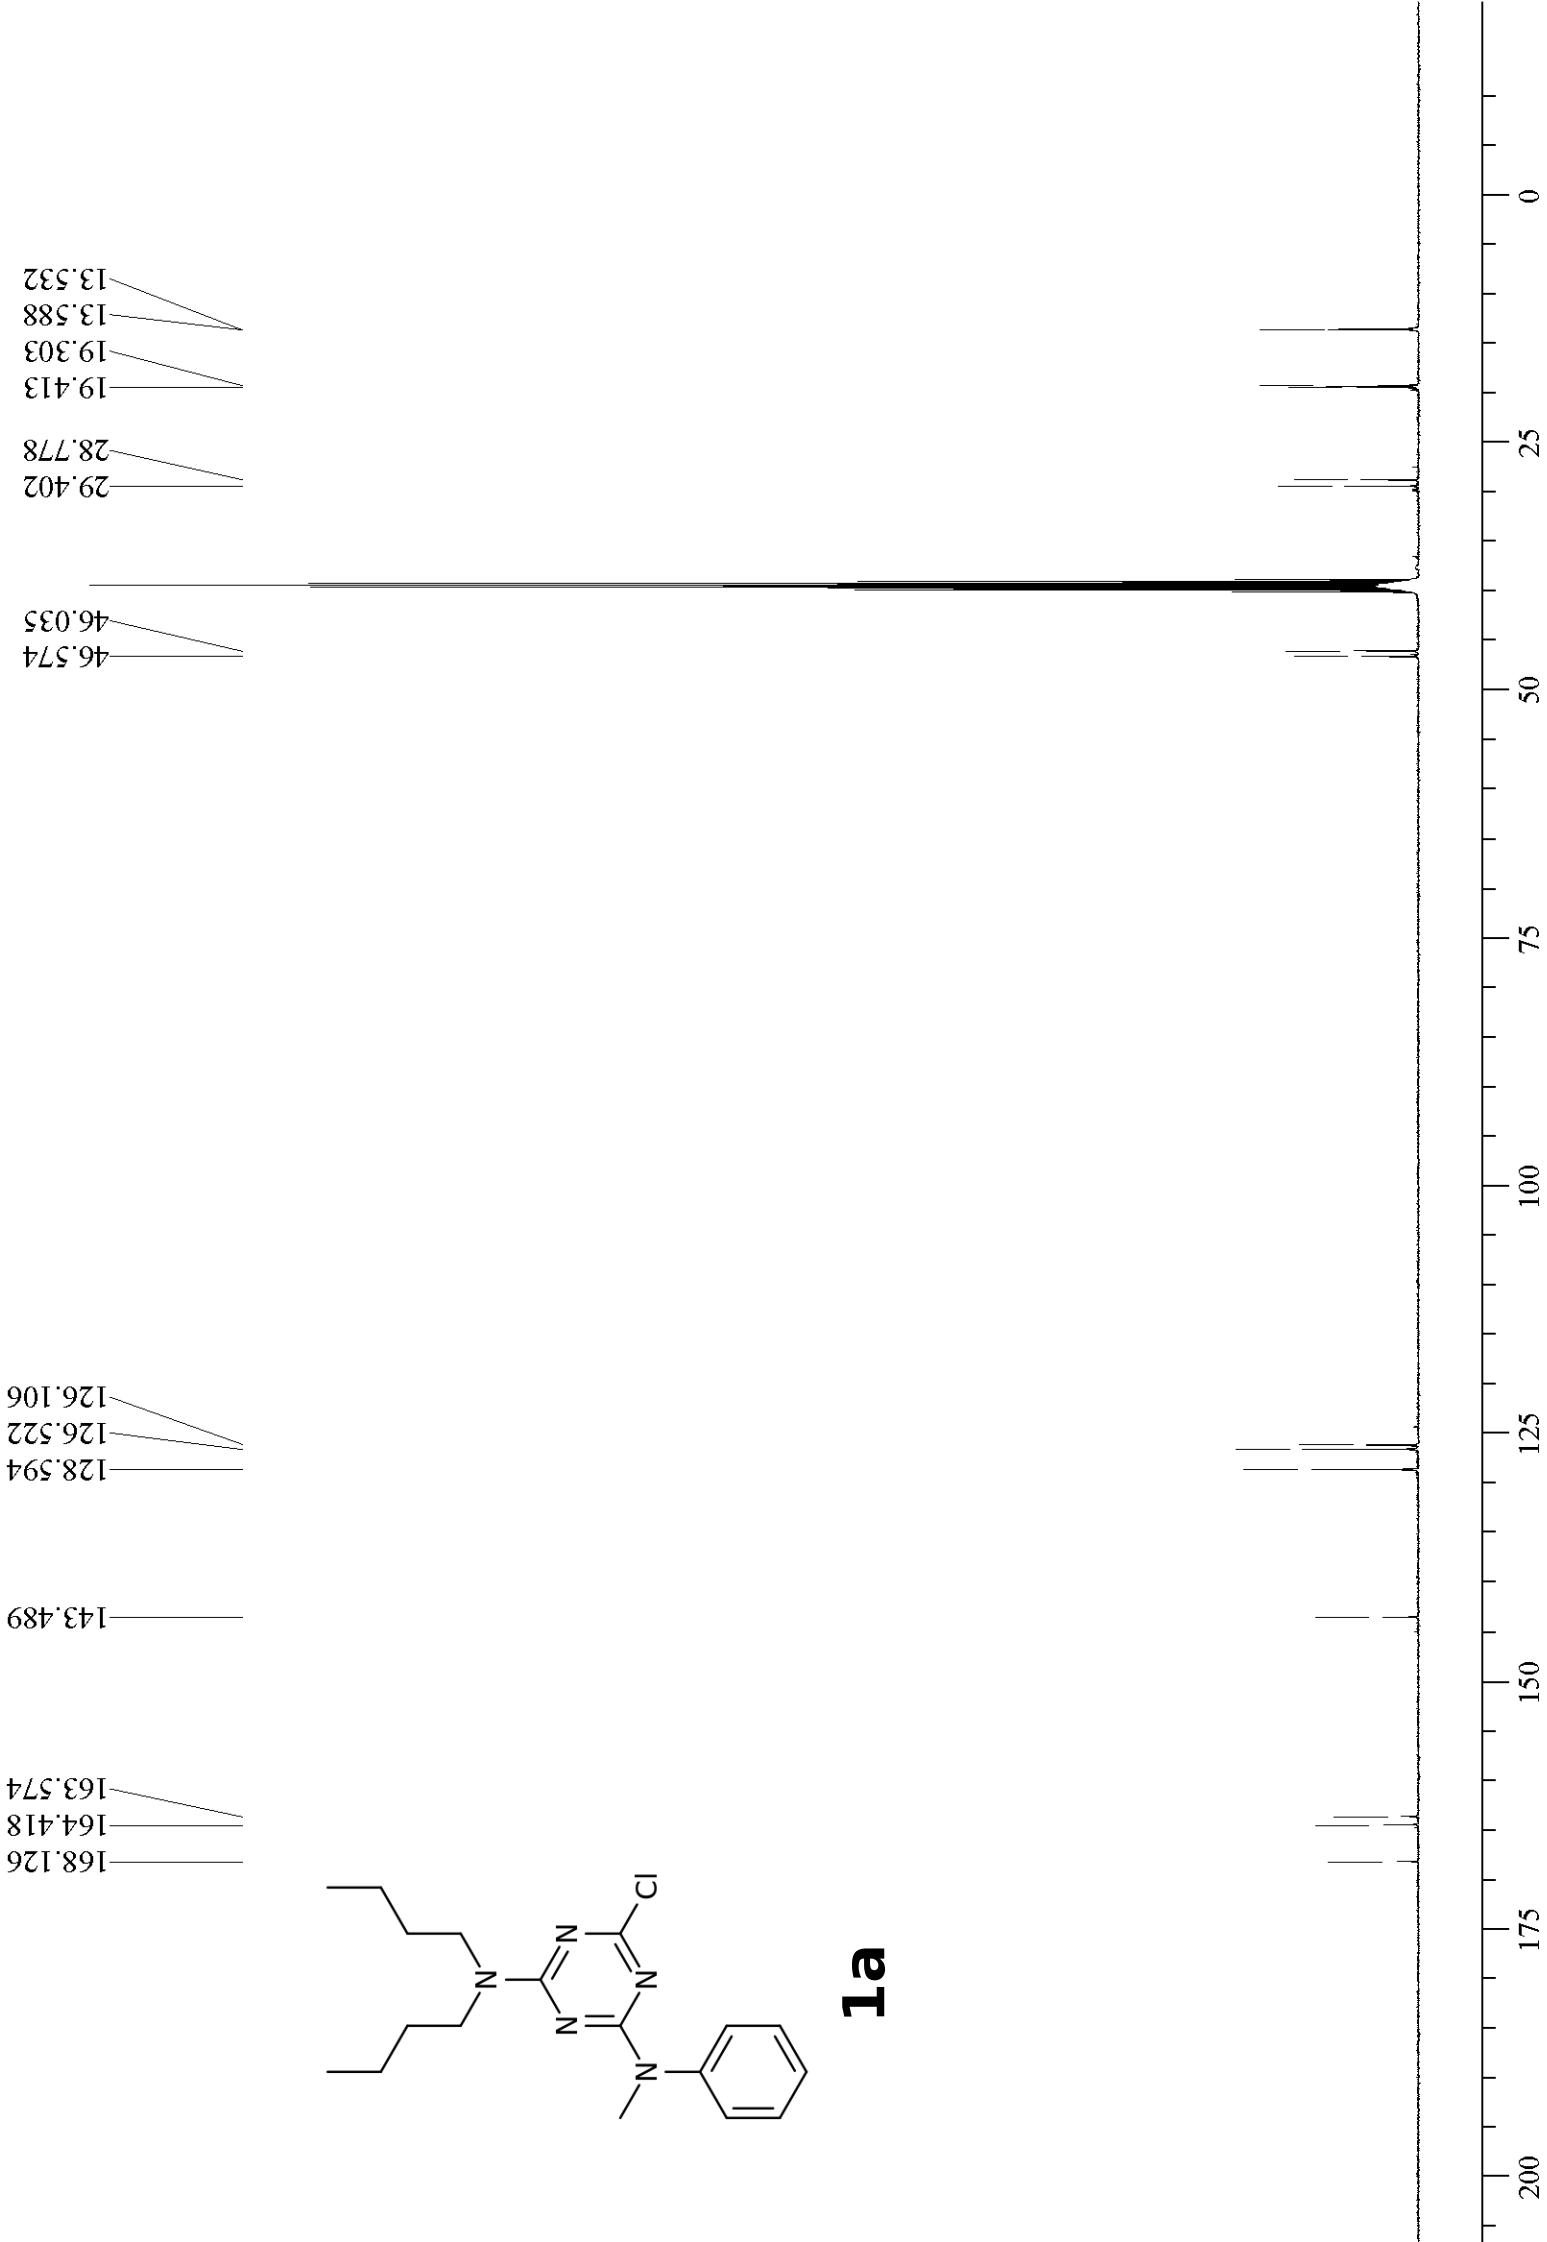



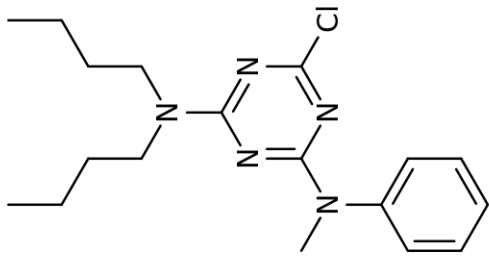

**1a**

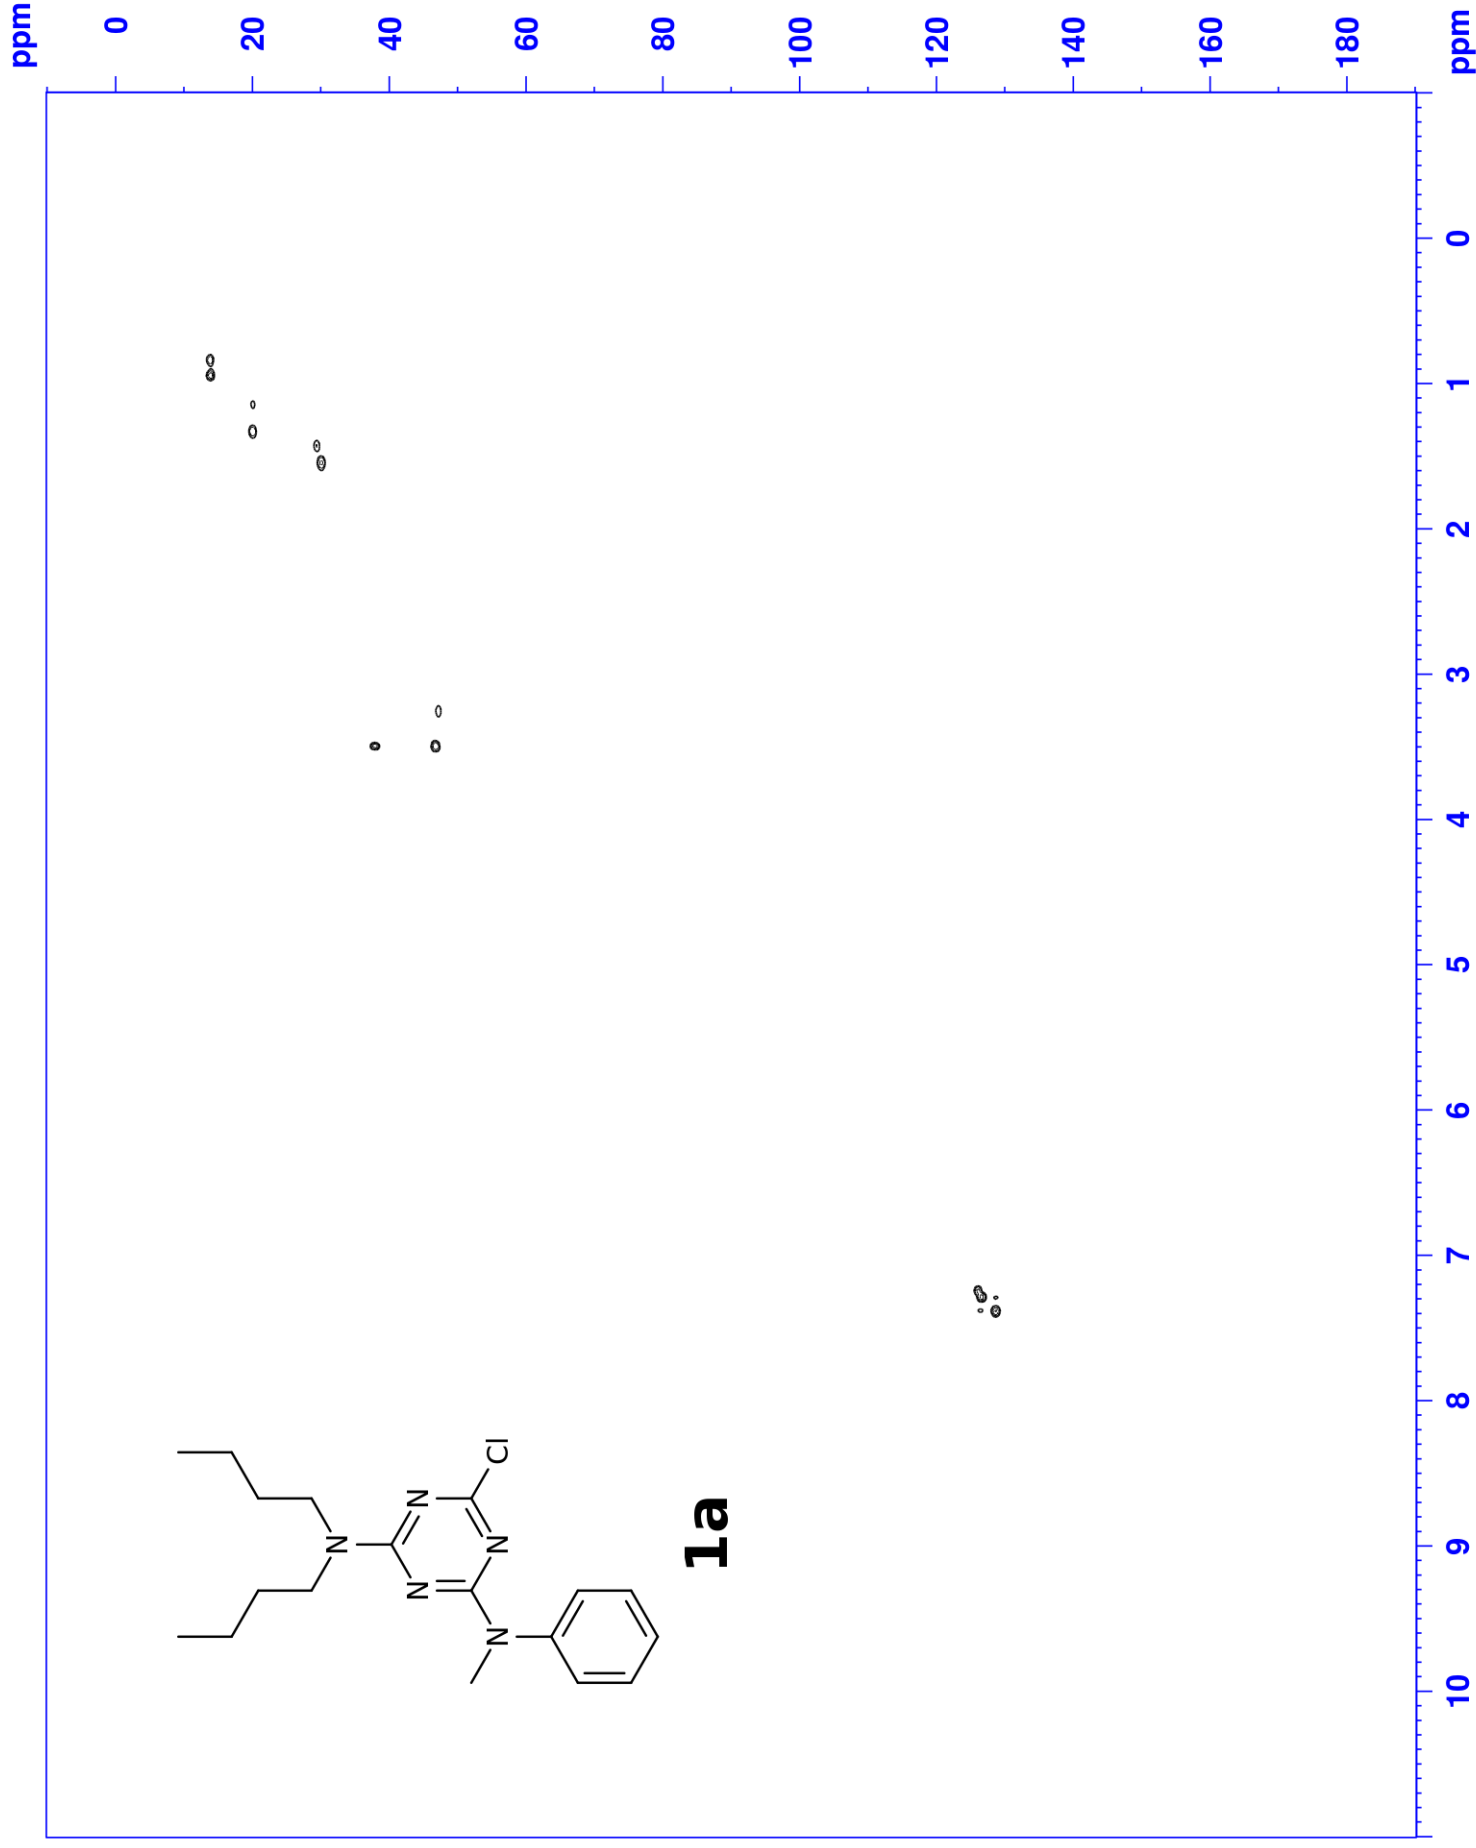

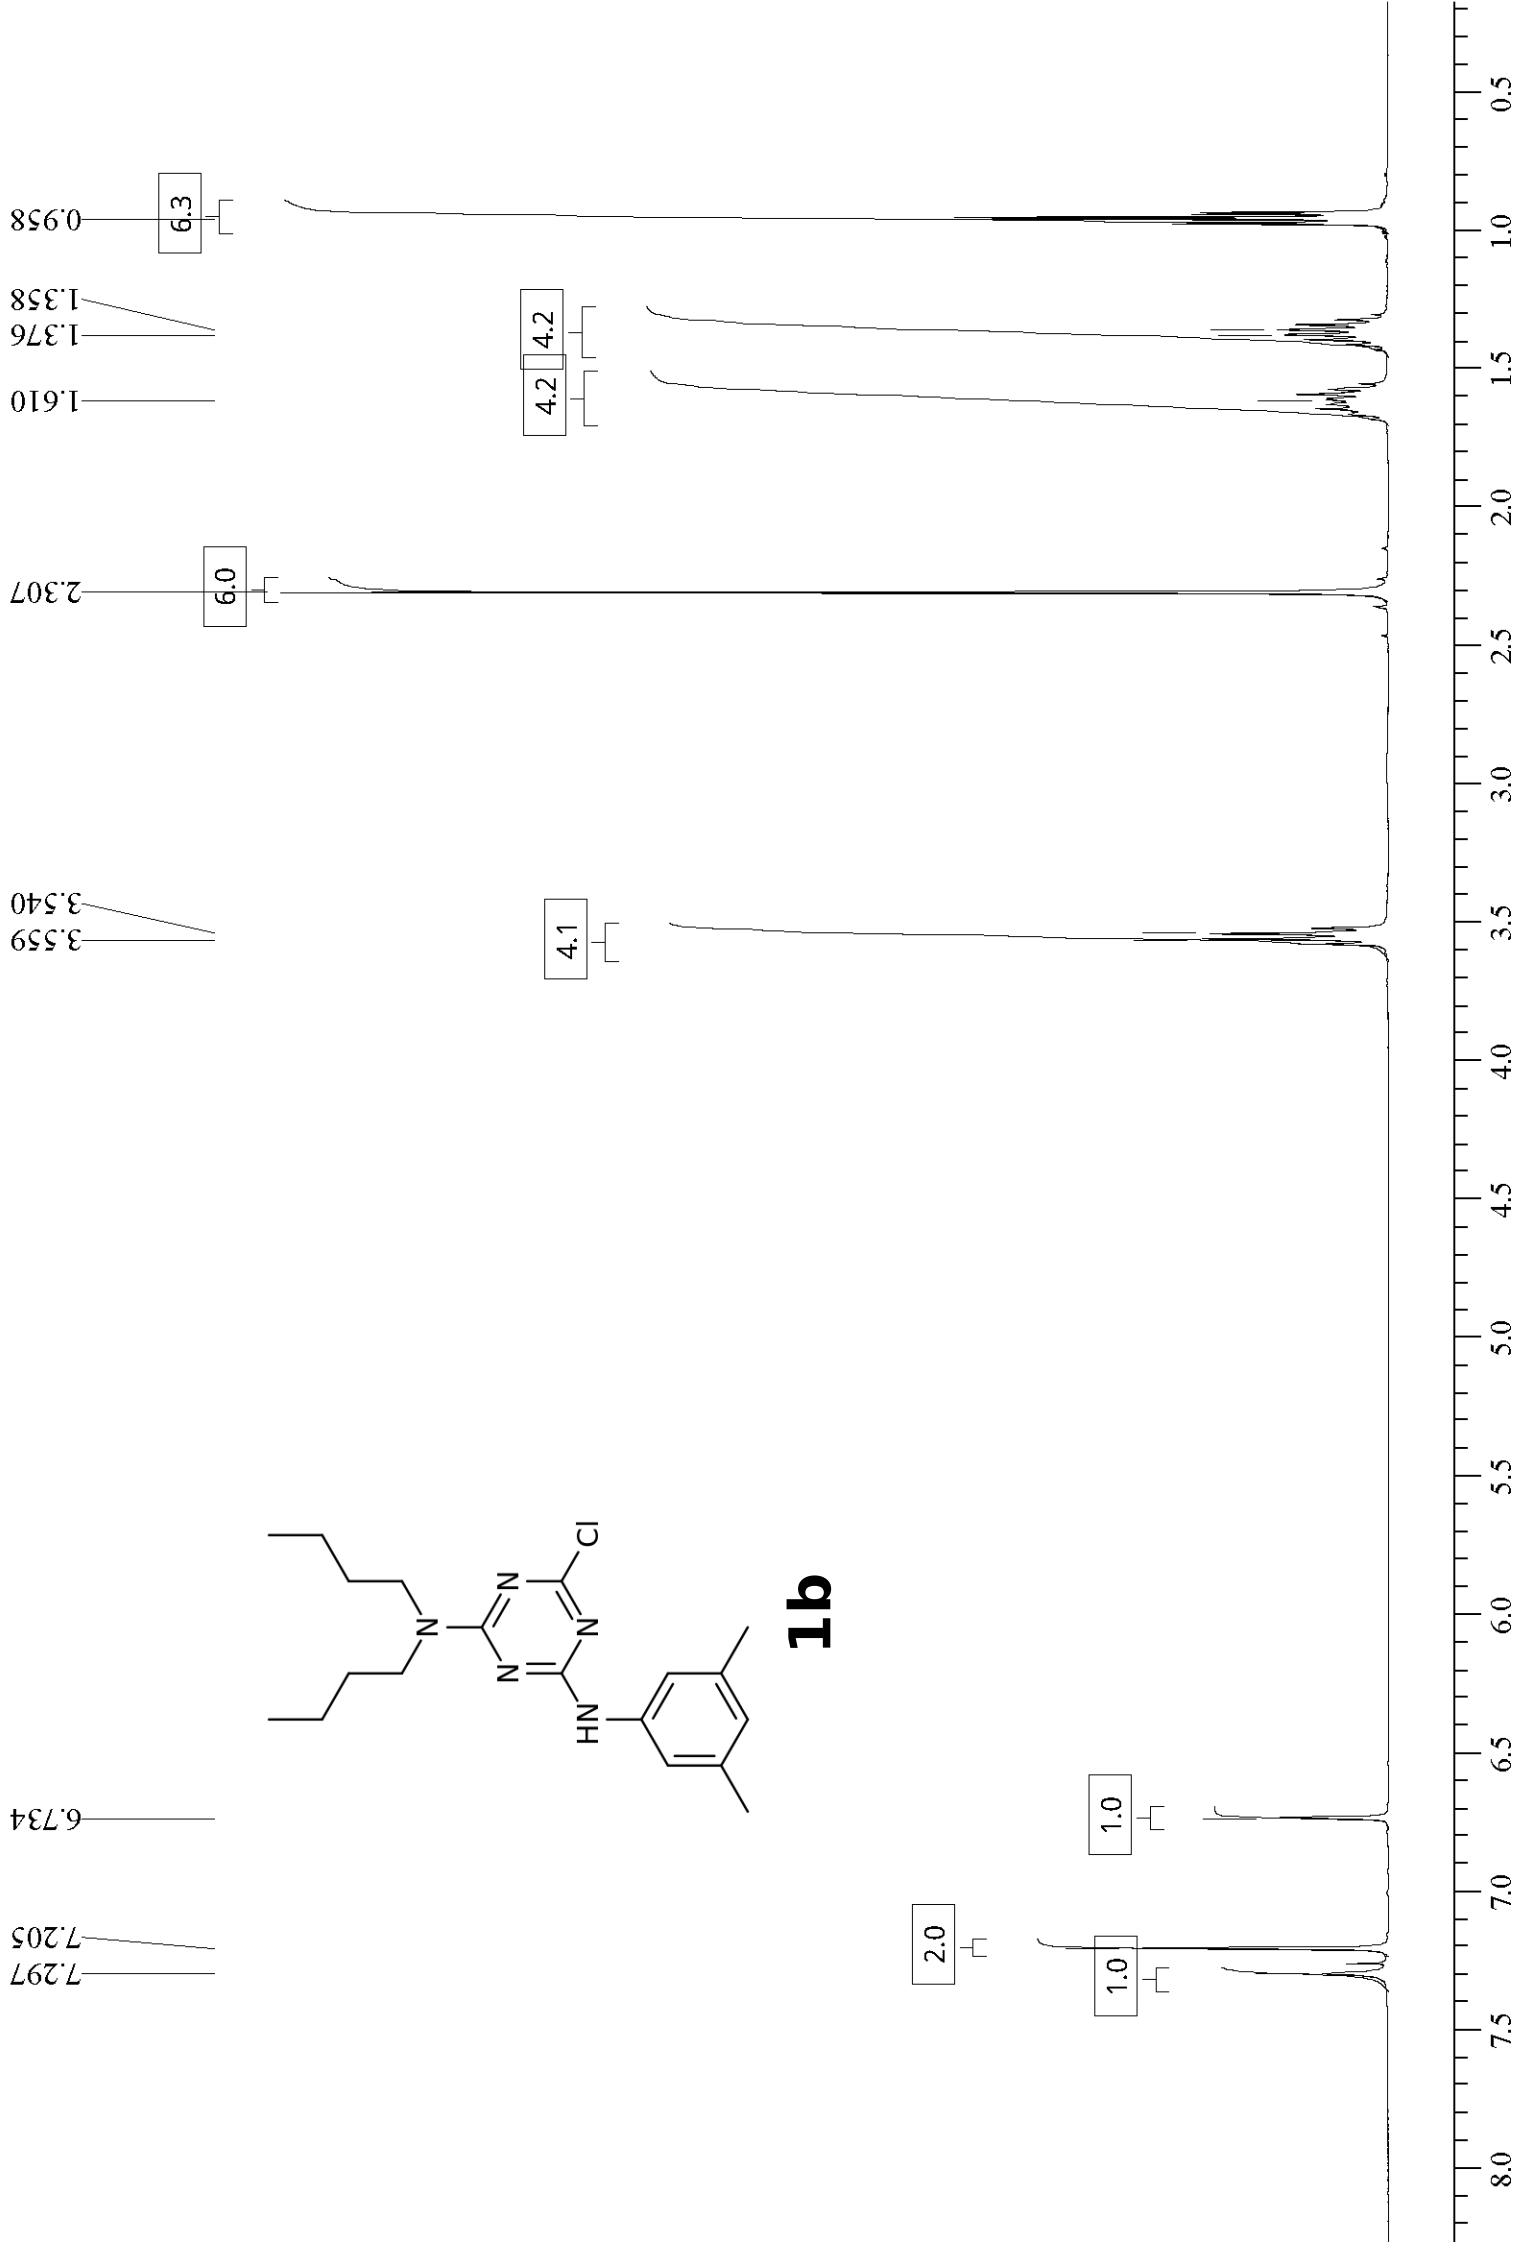

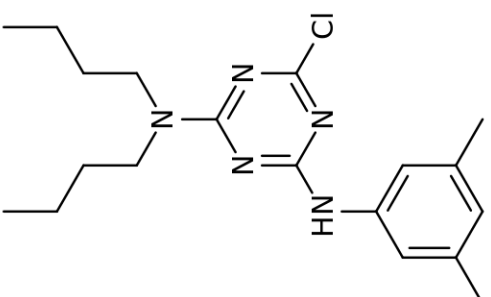

**1b**

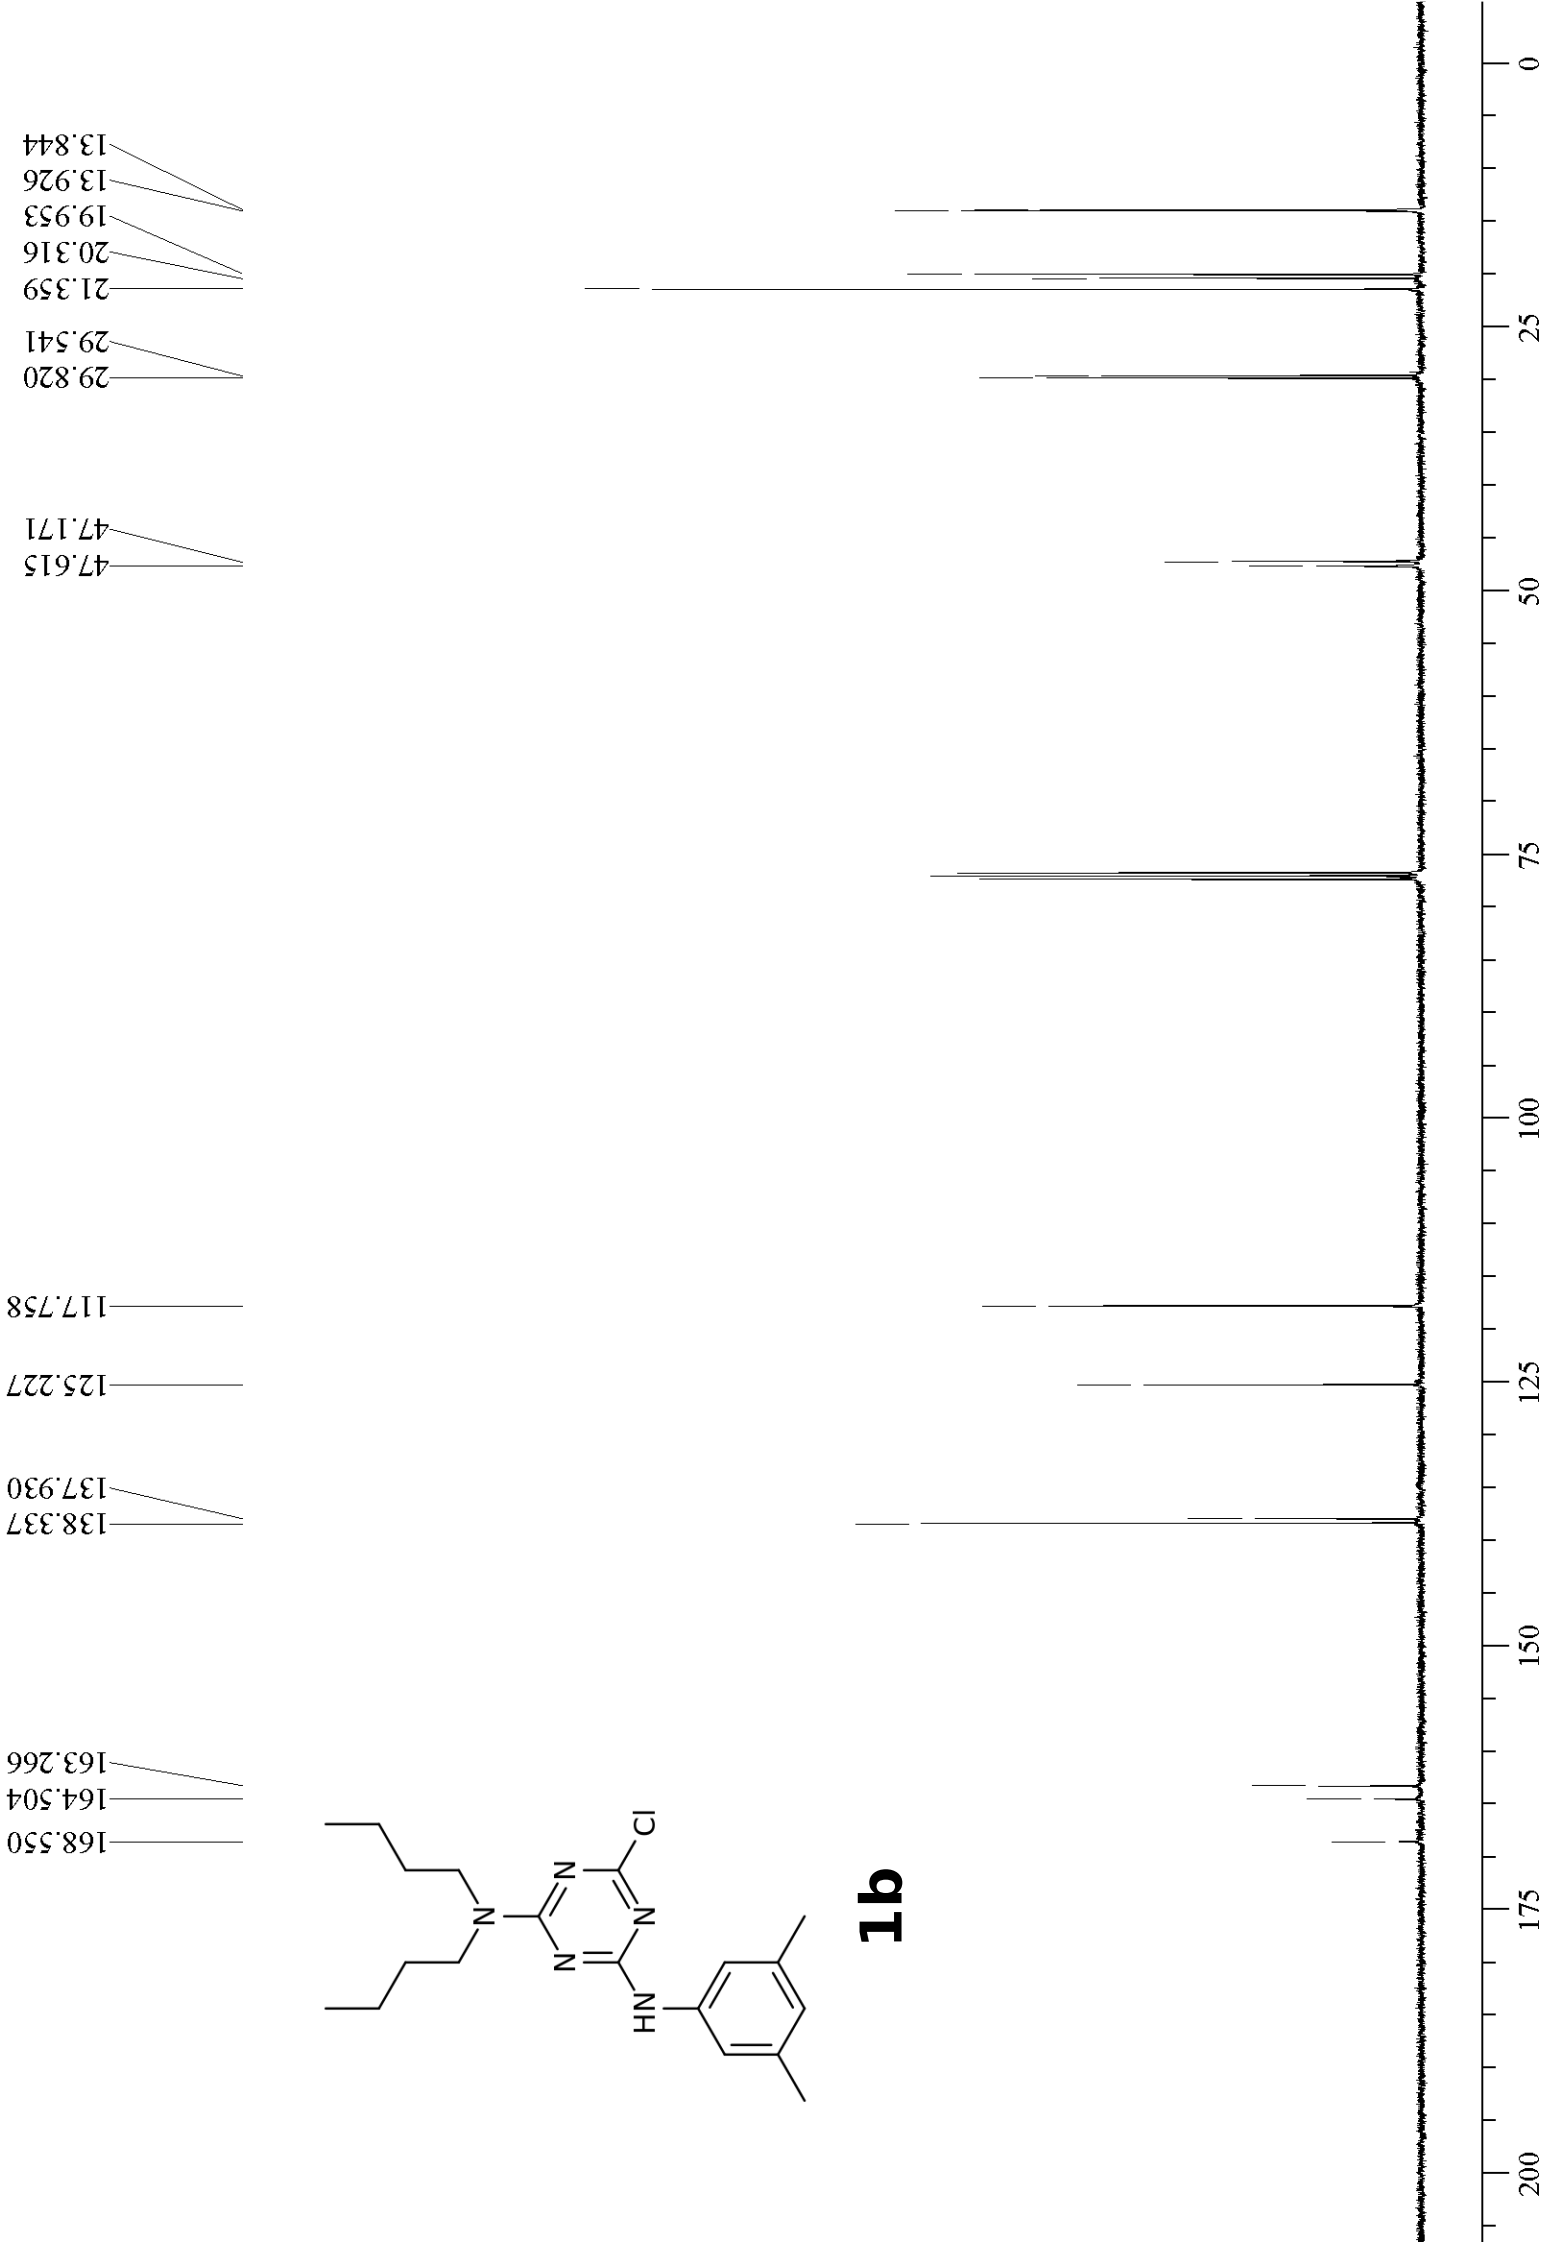

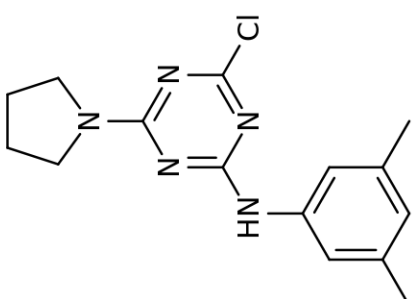

**1c**

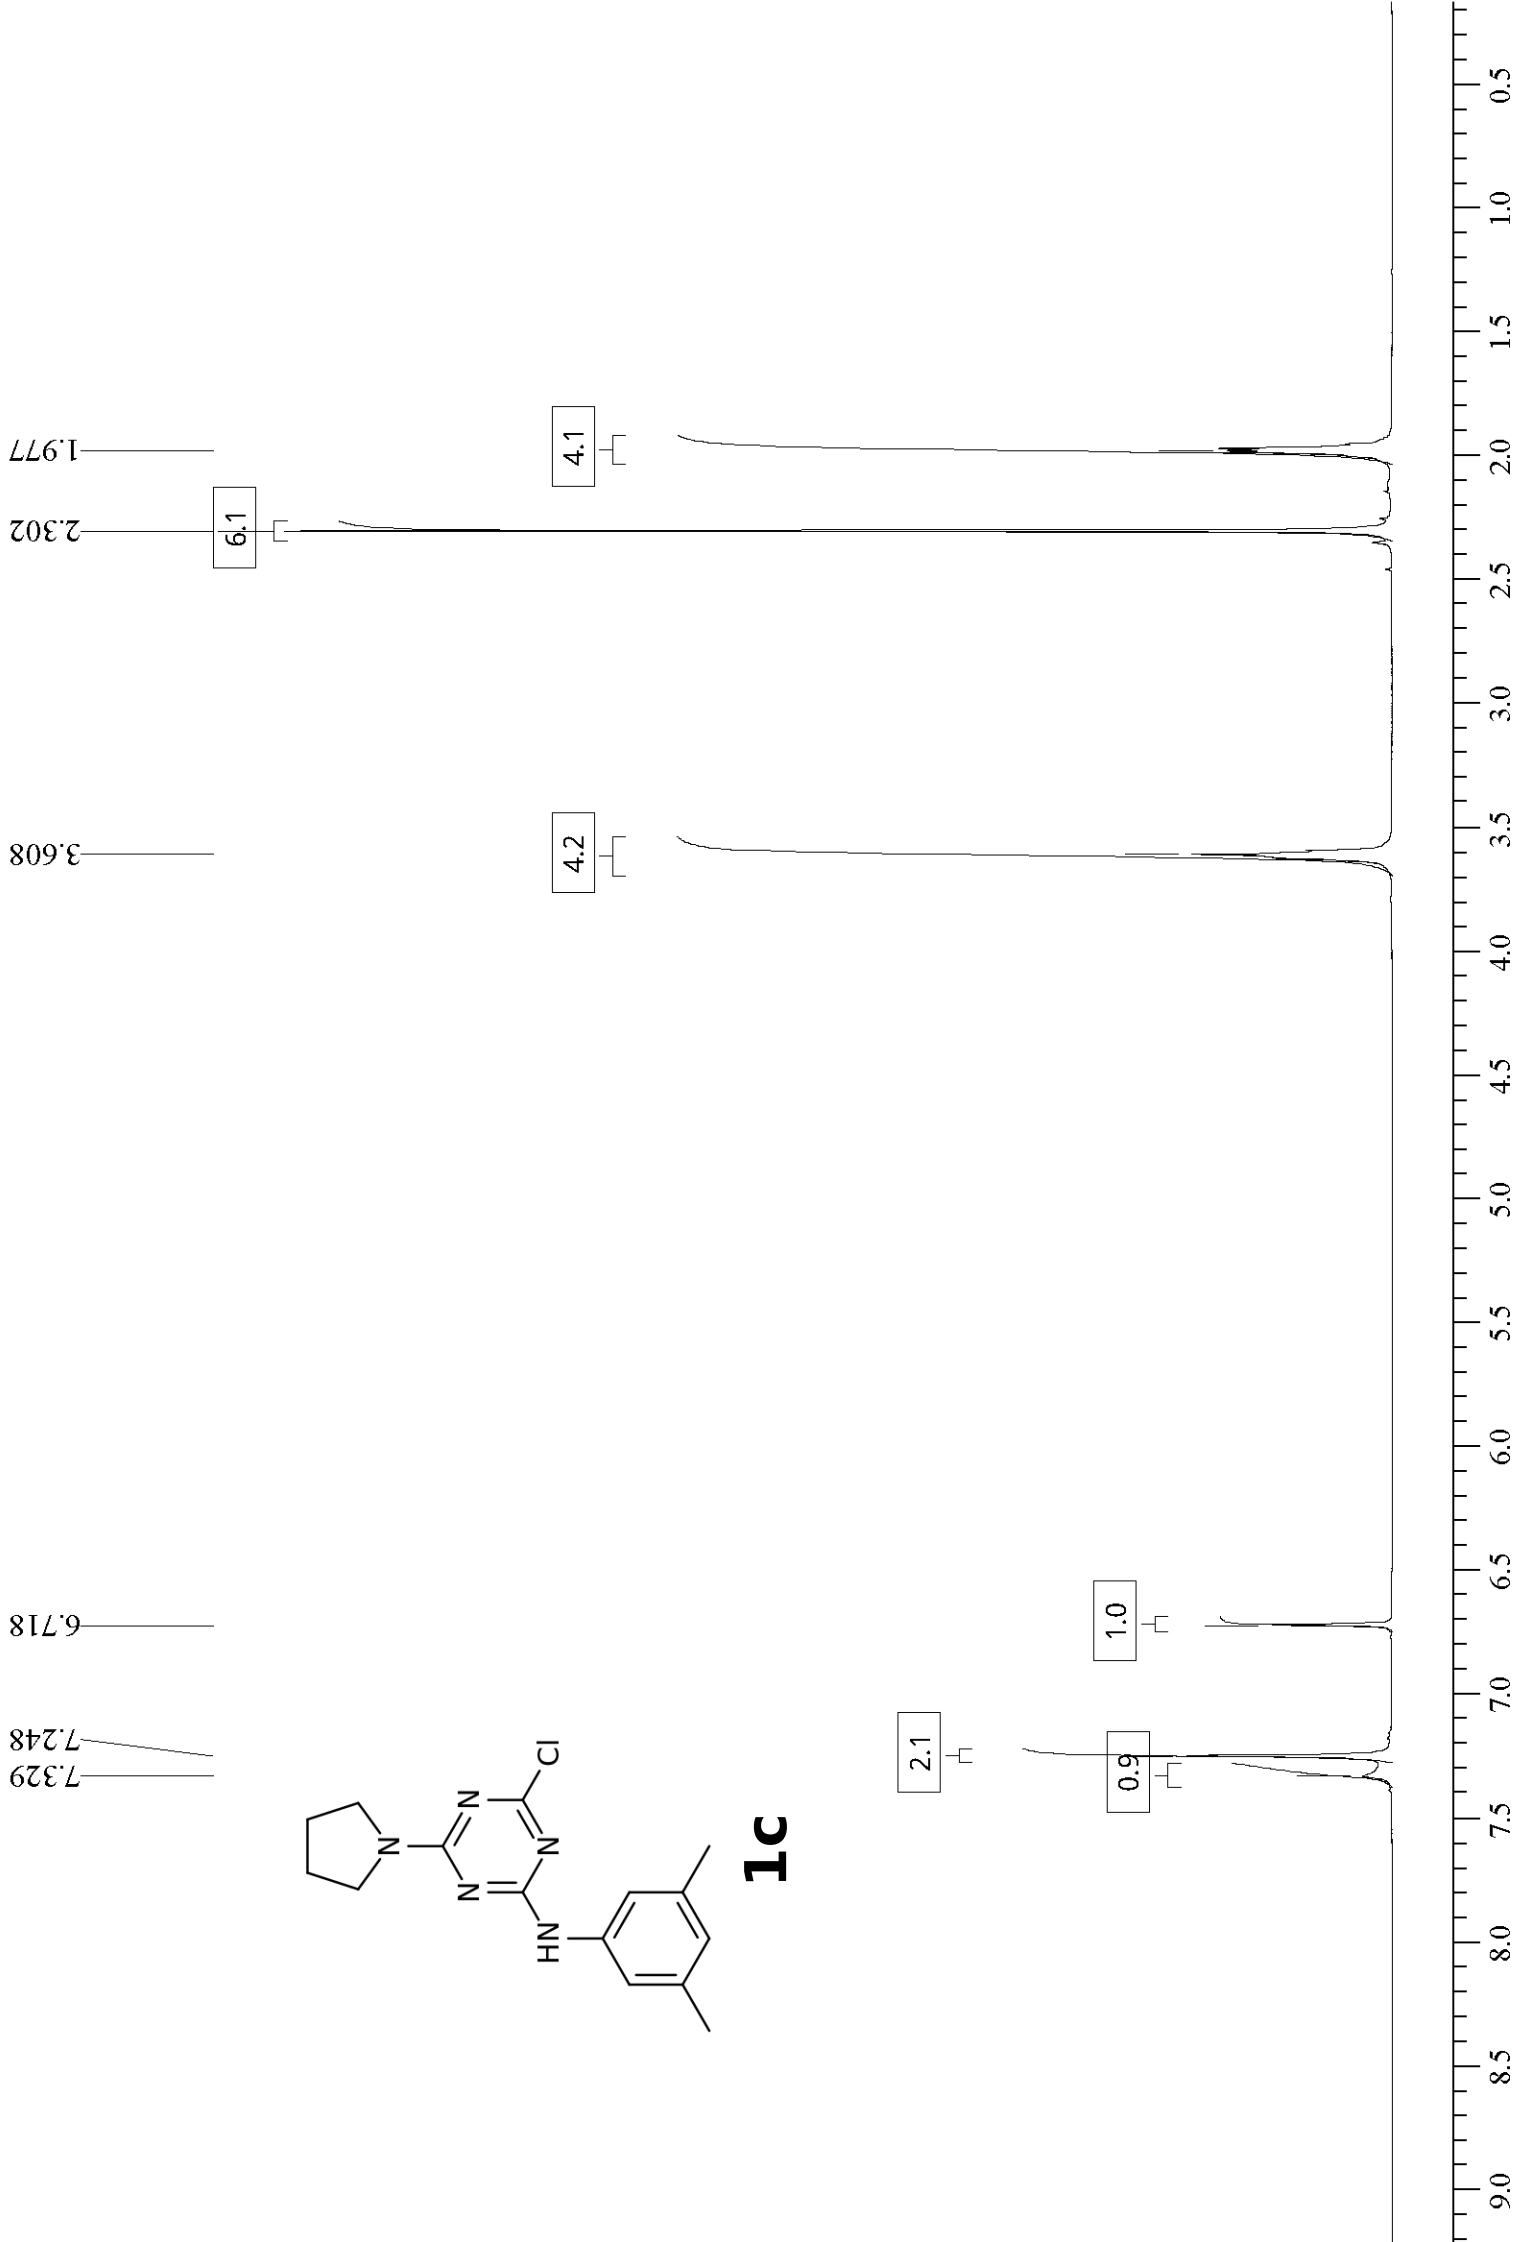

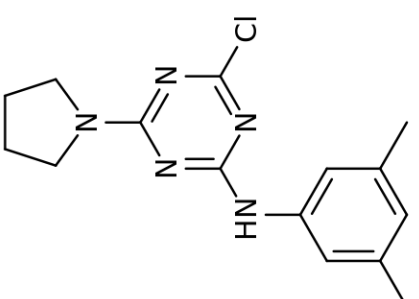

**1c**

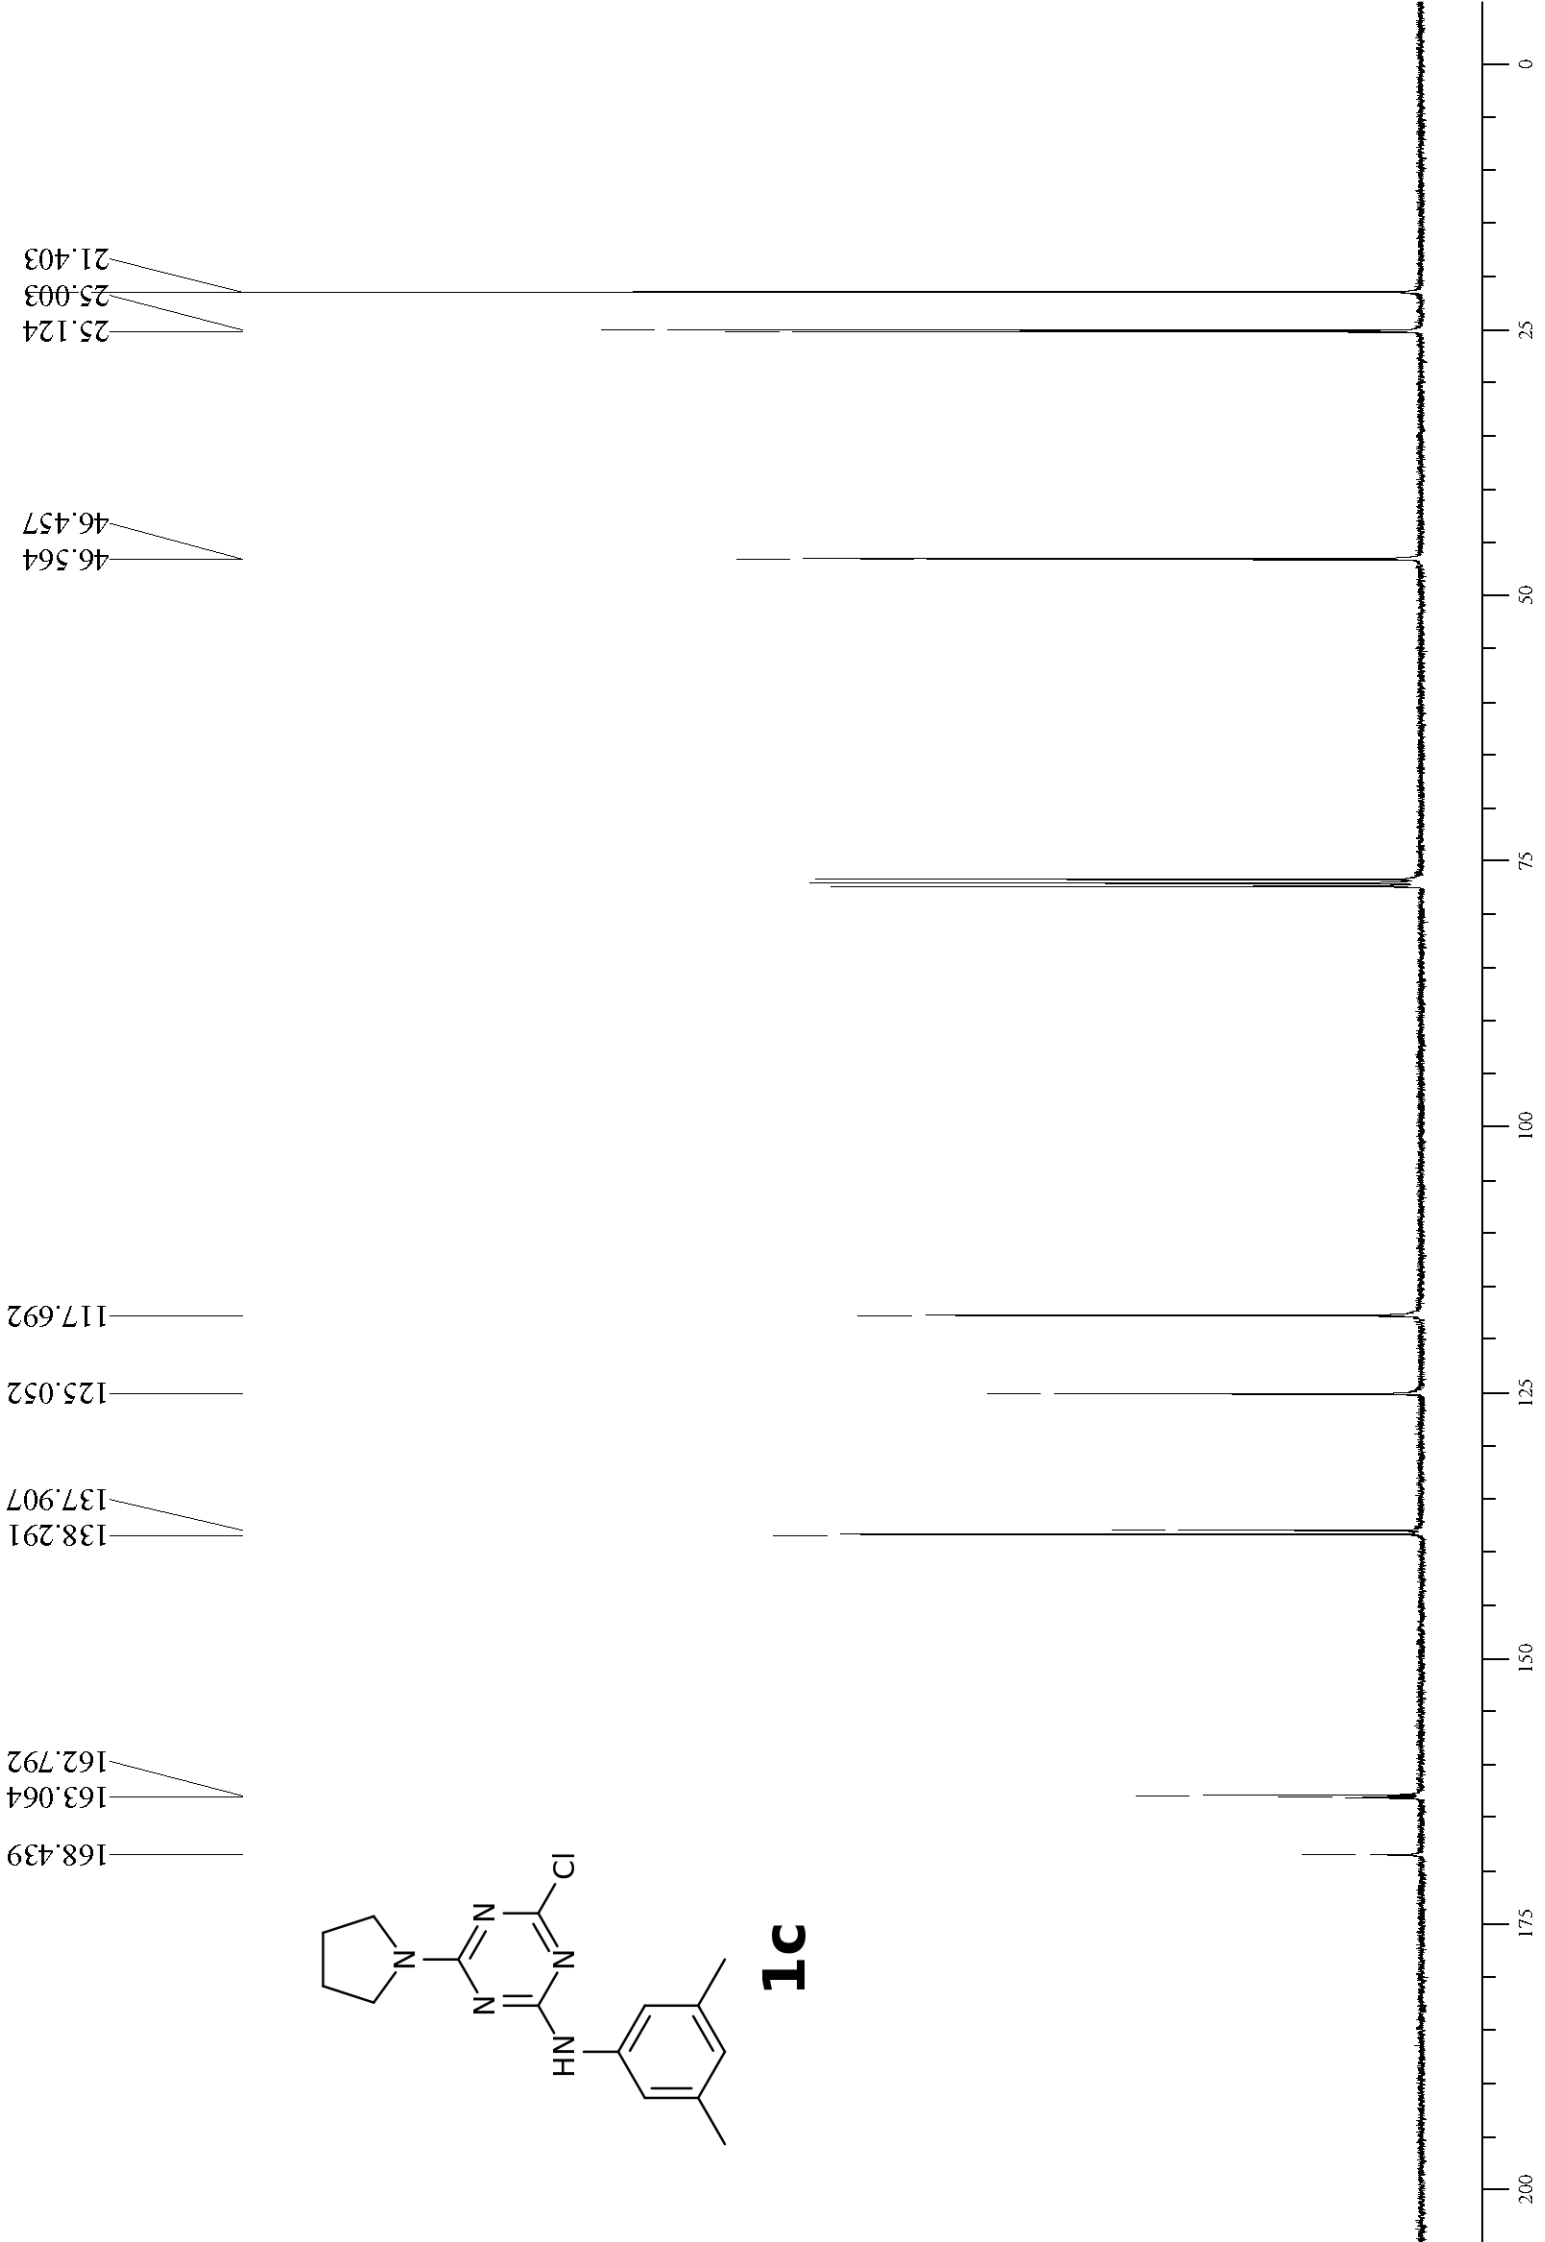

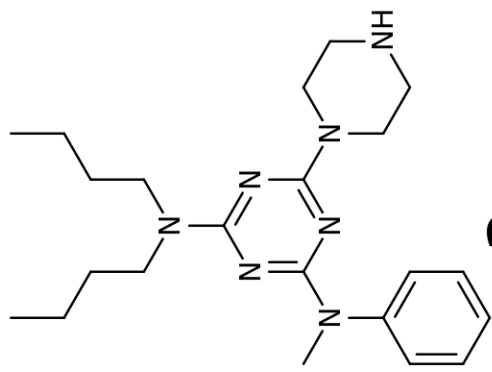

**2a**

363 K

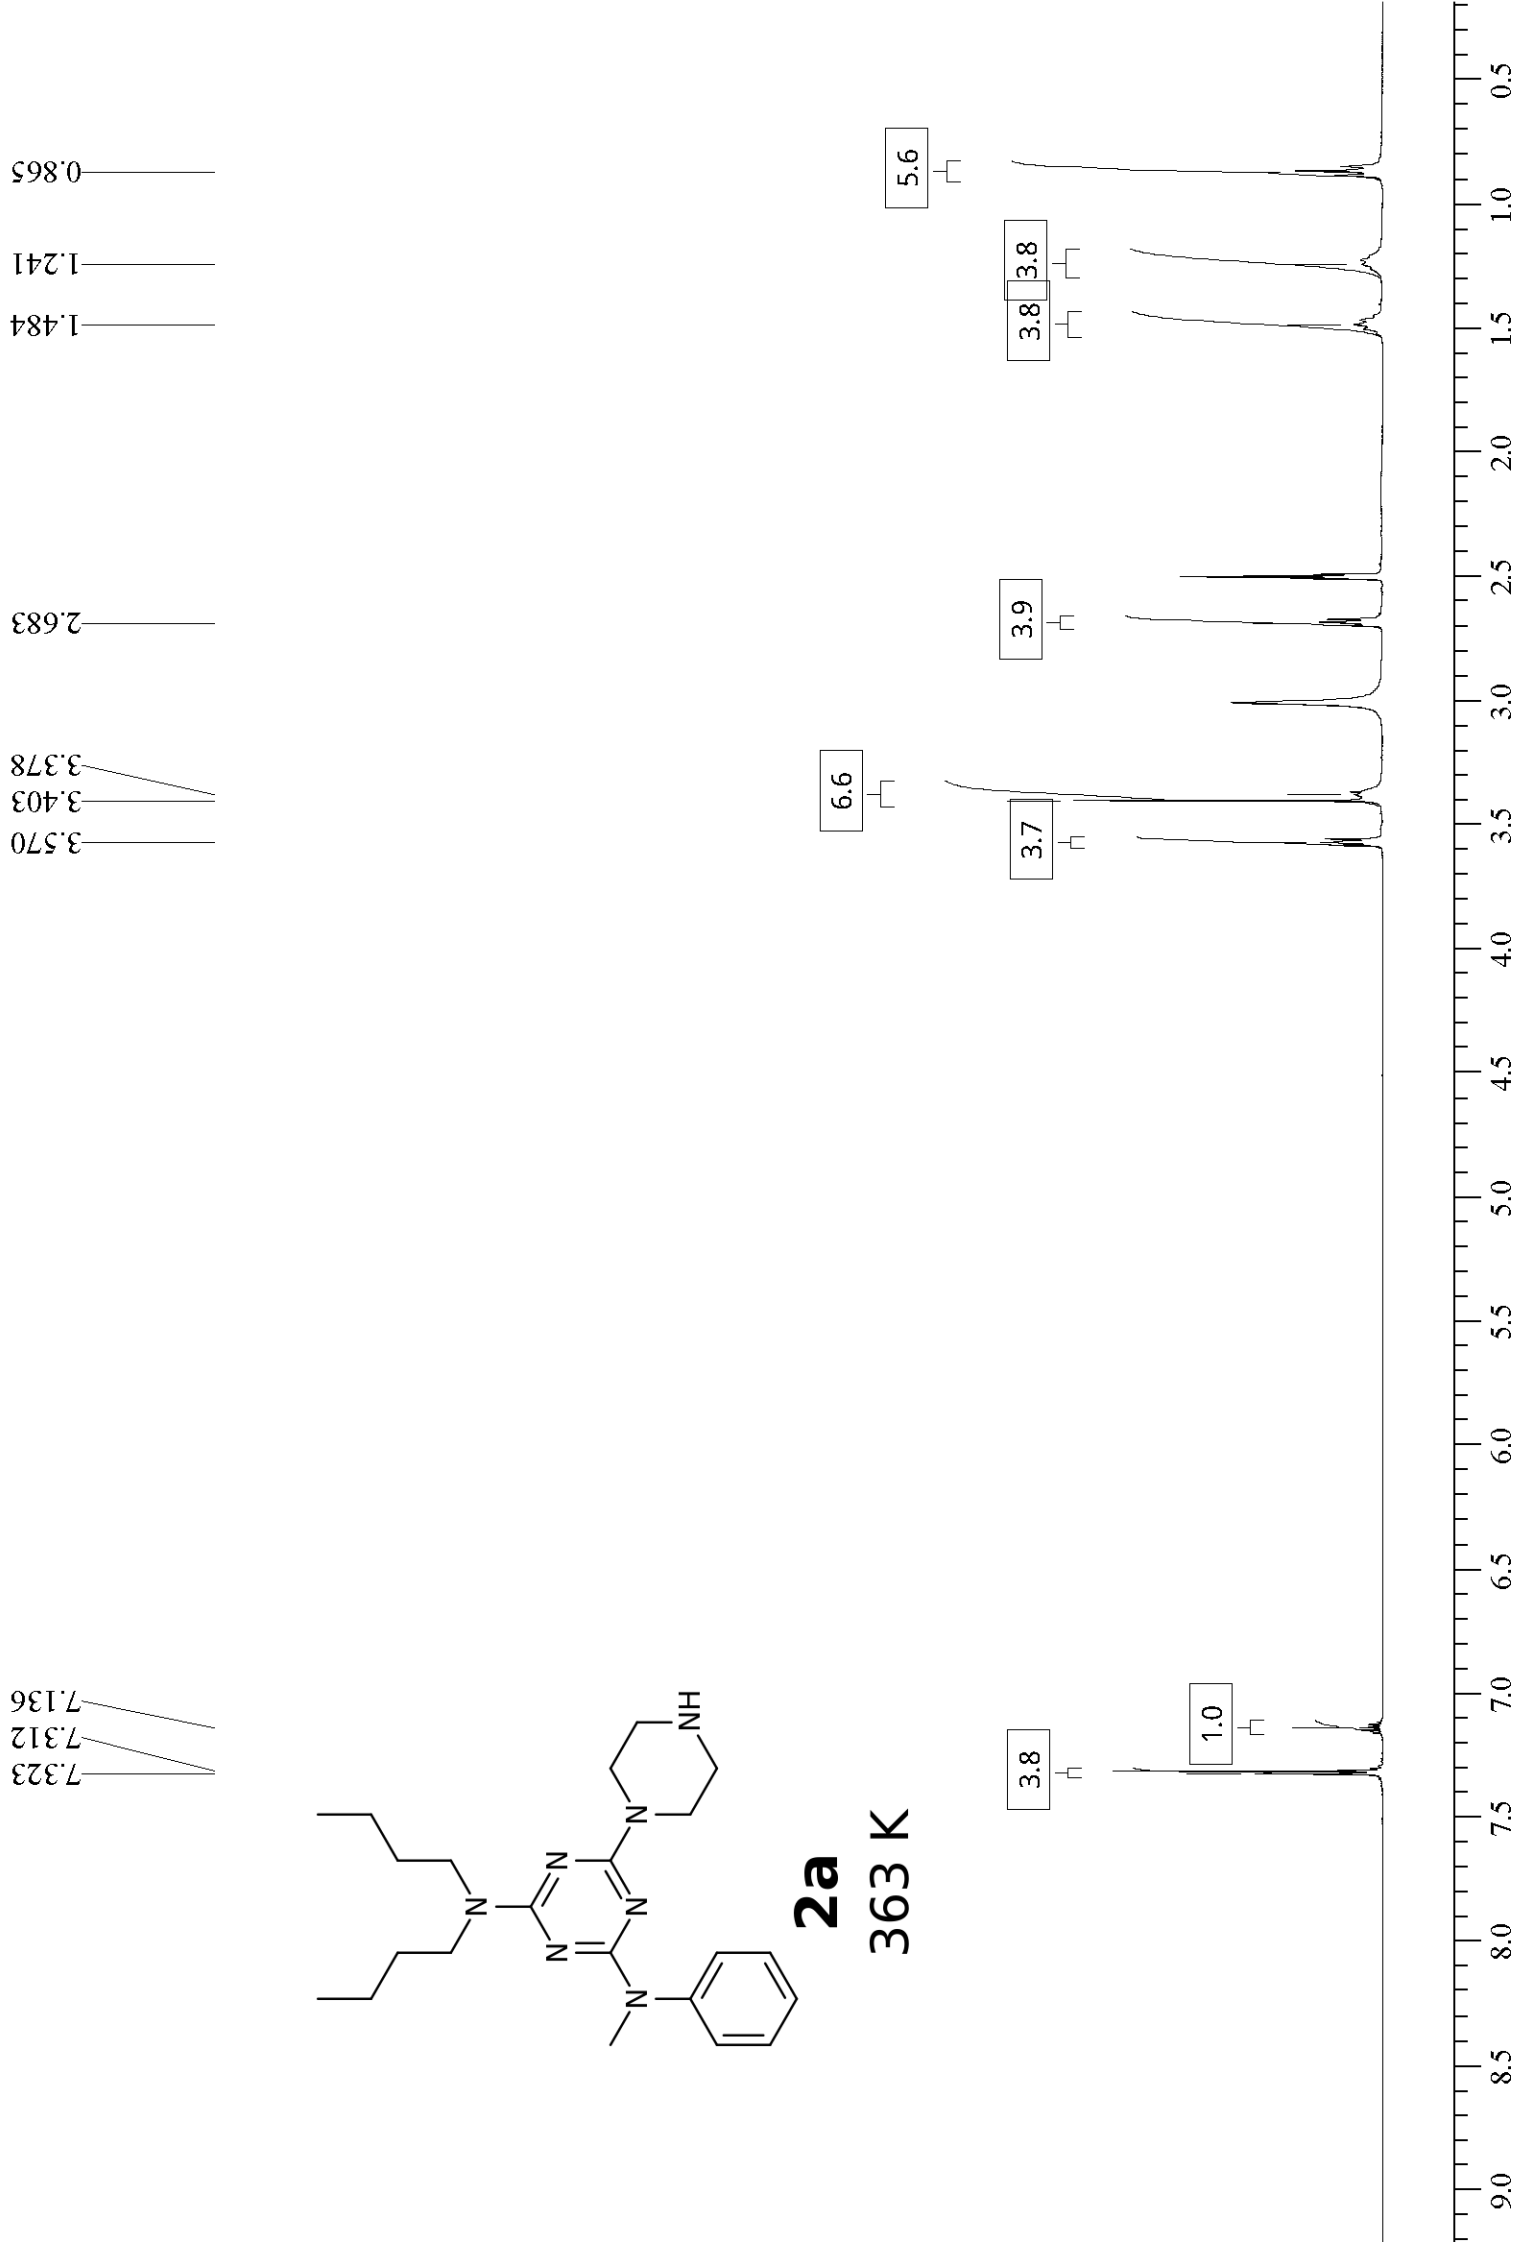

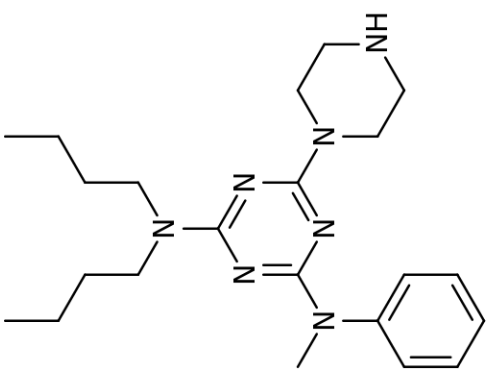

2a

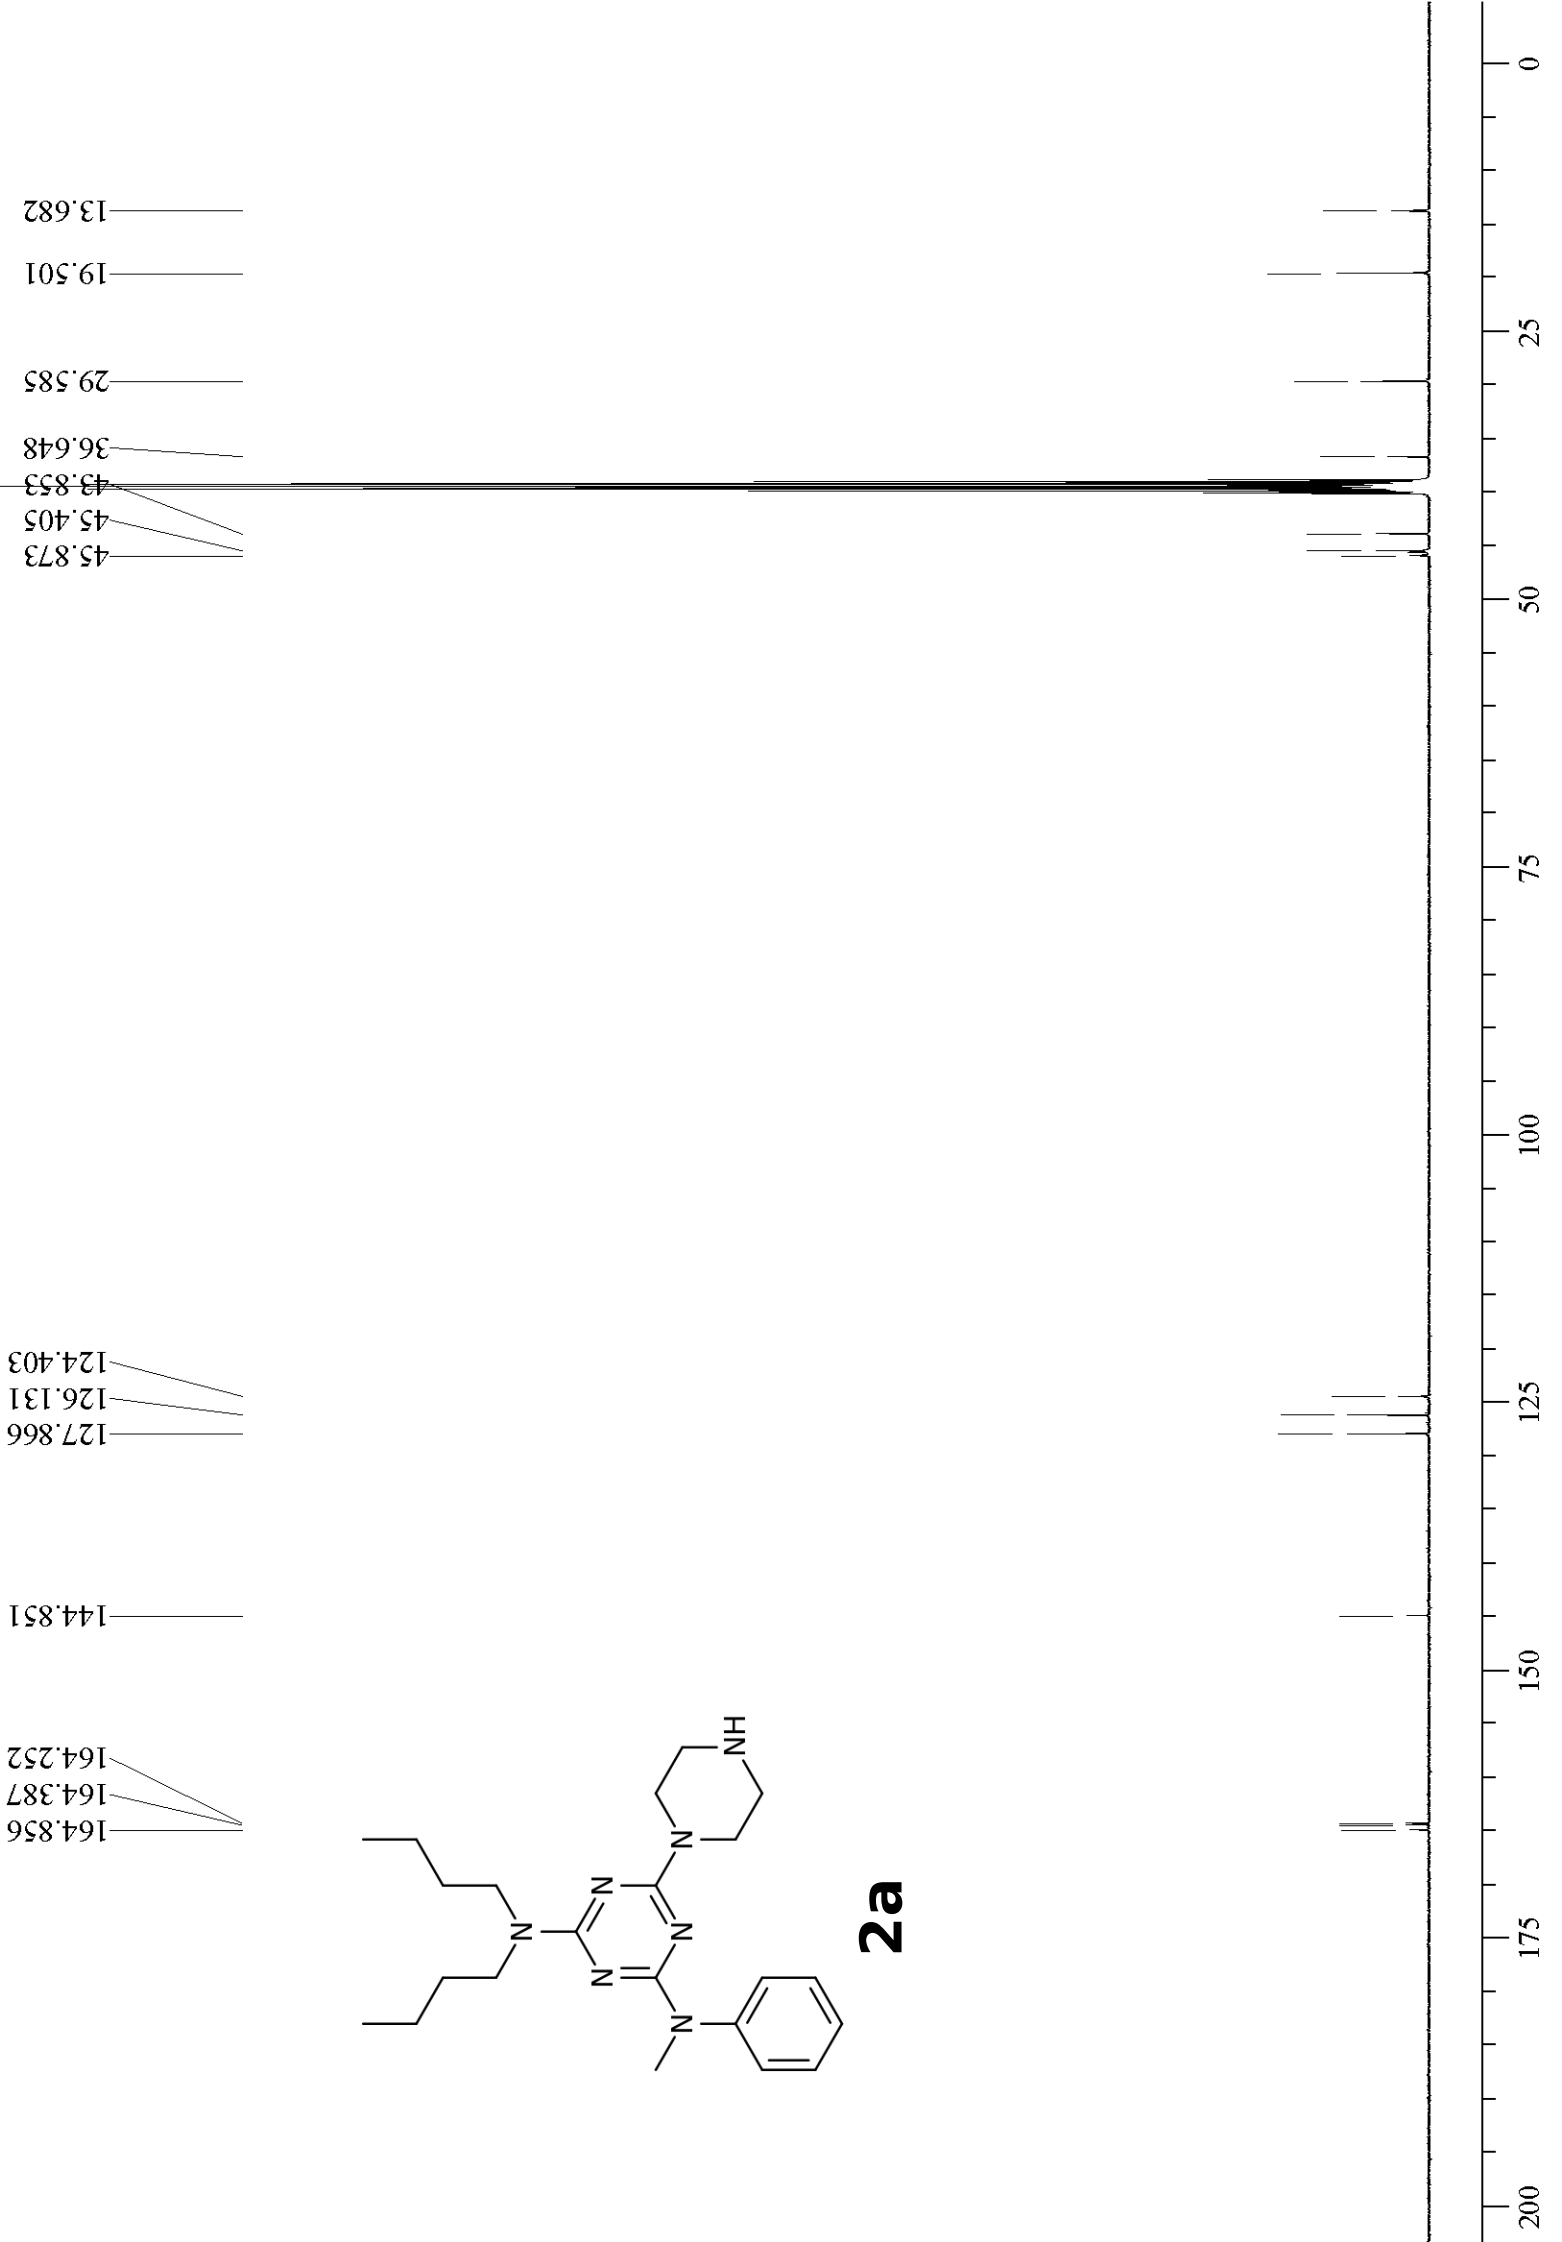

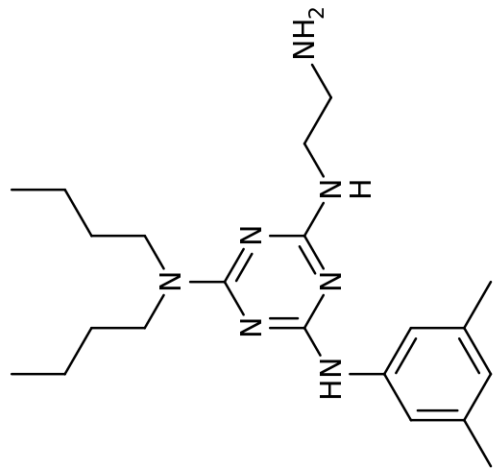

**2b**

363 K

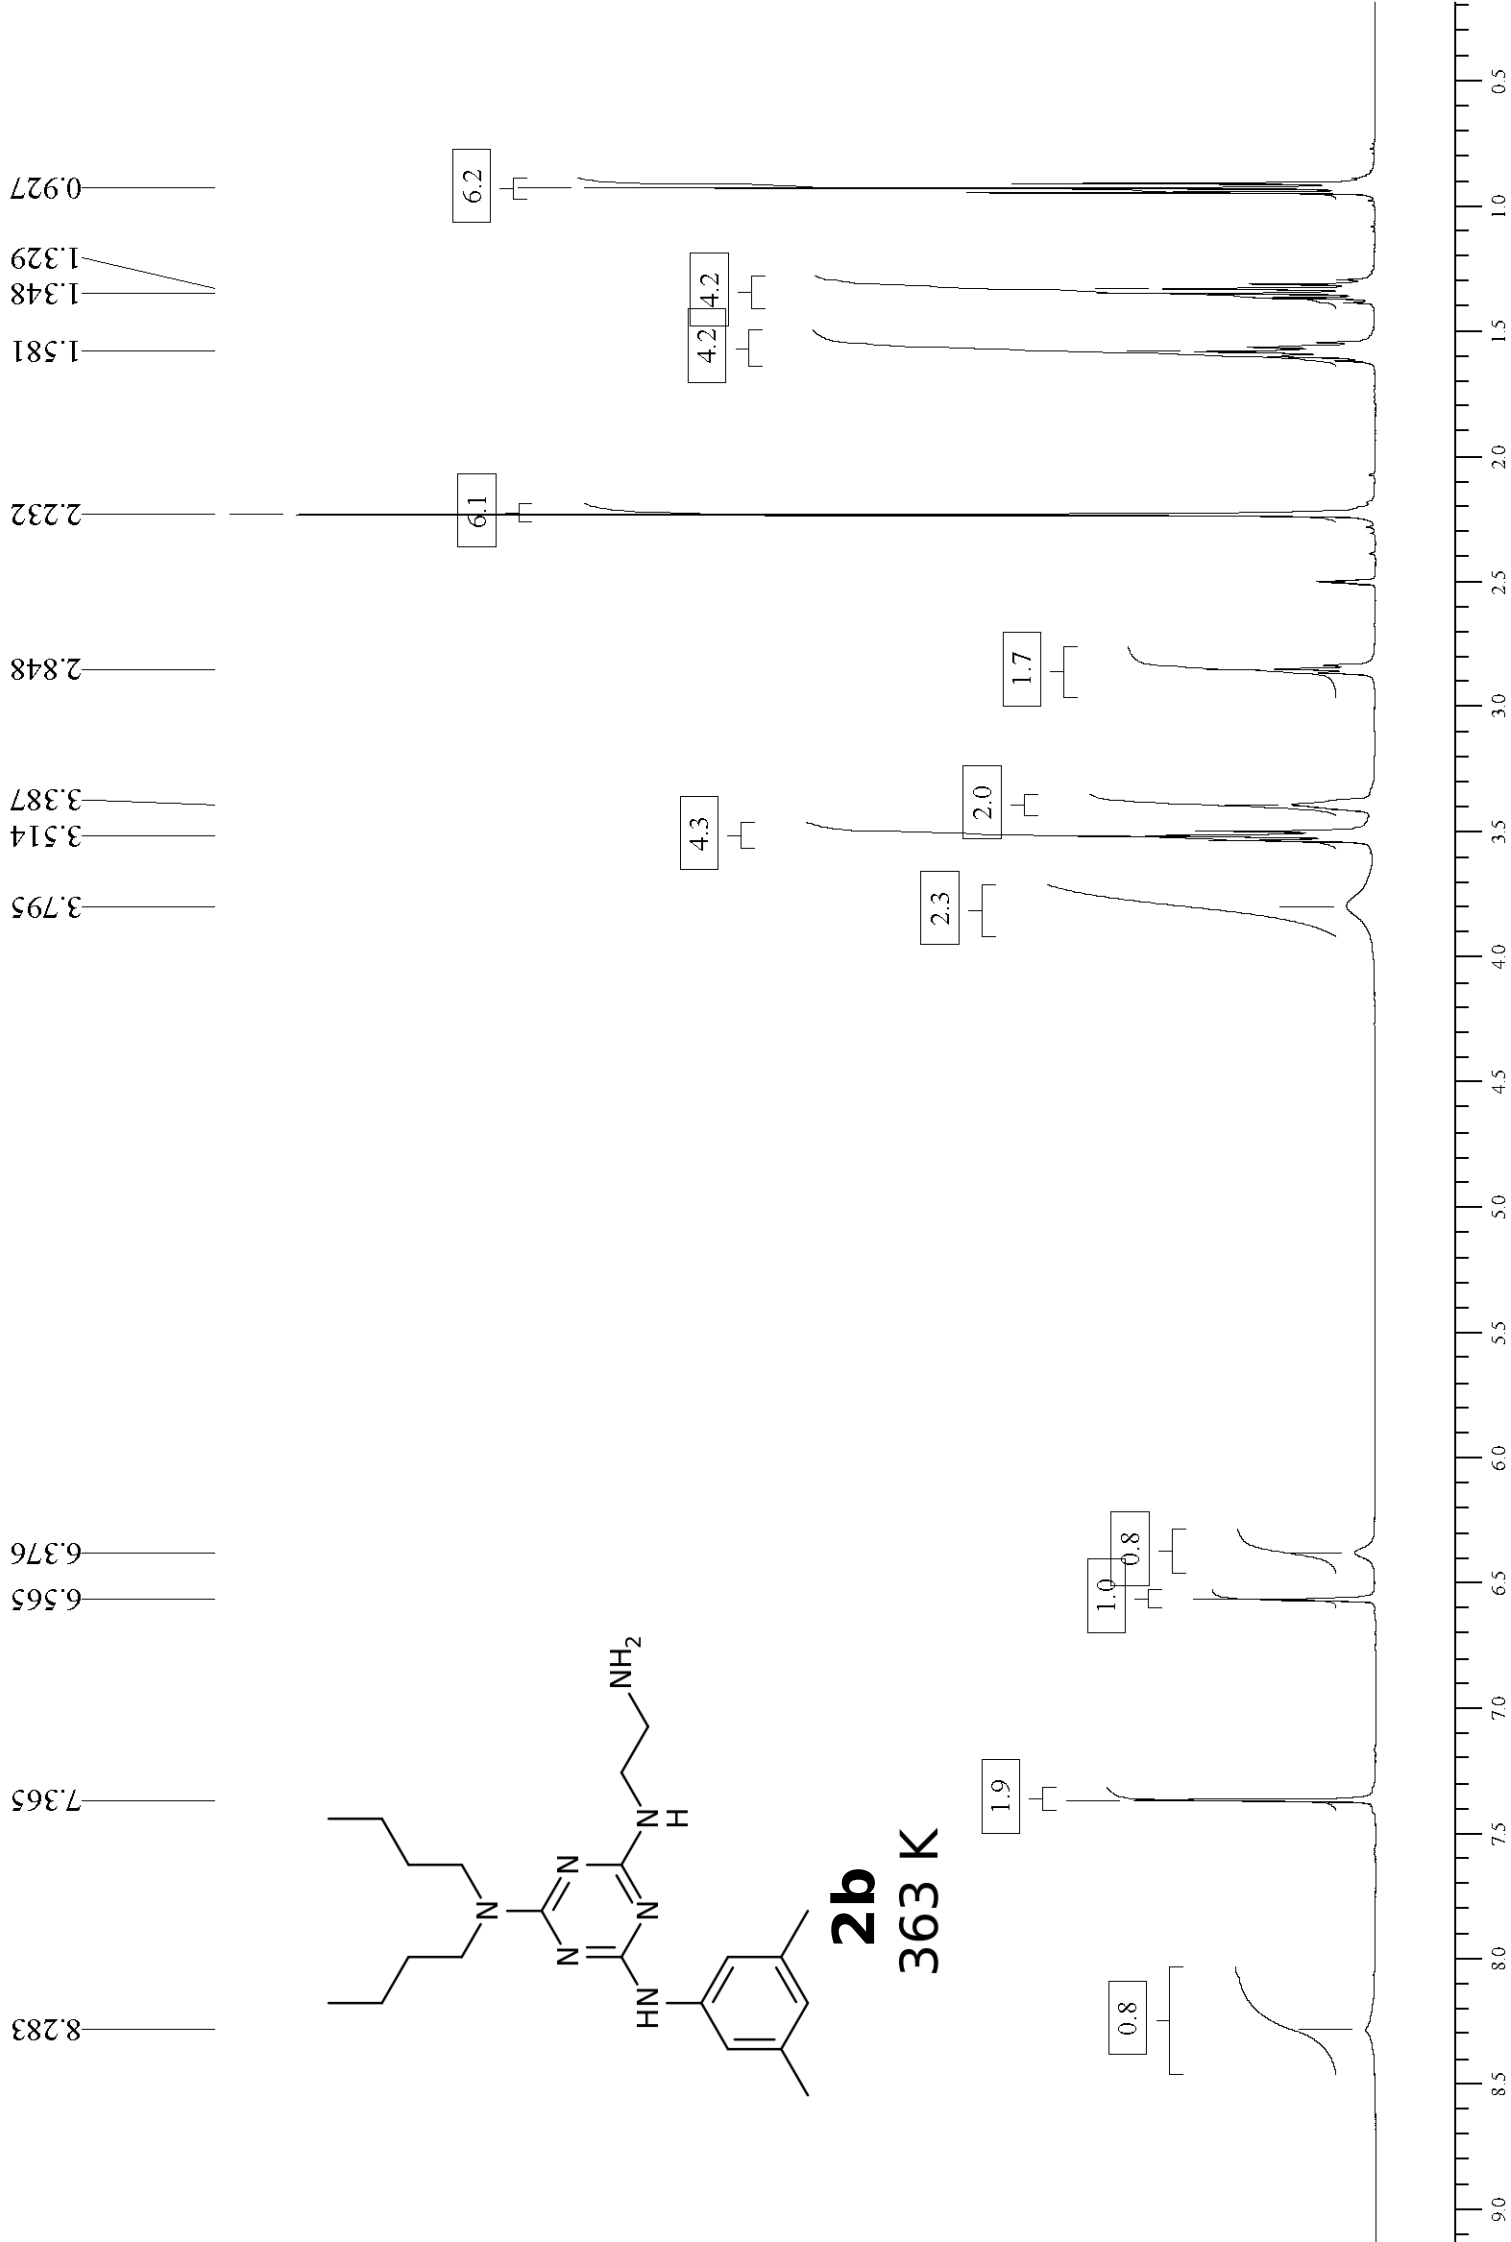



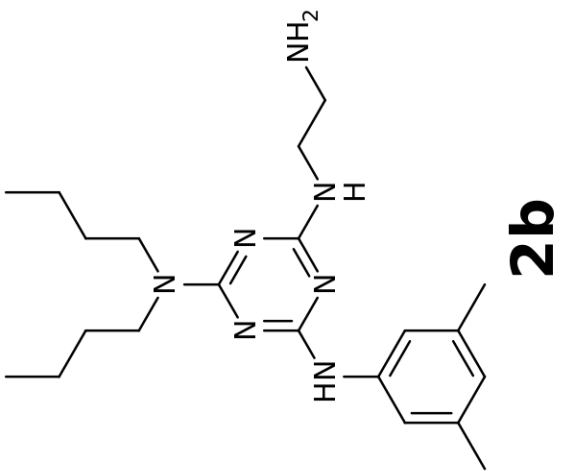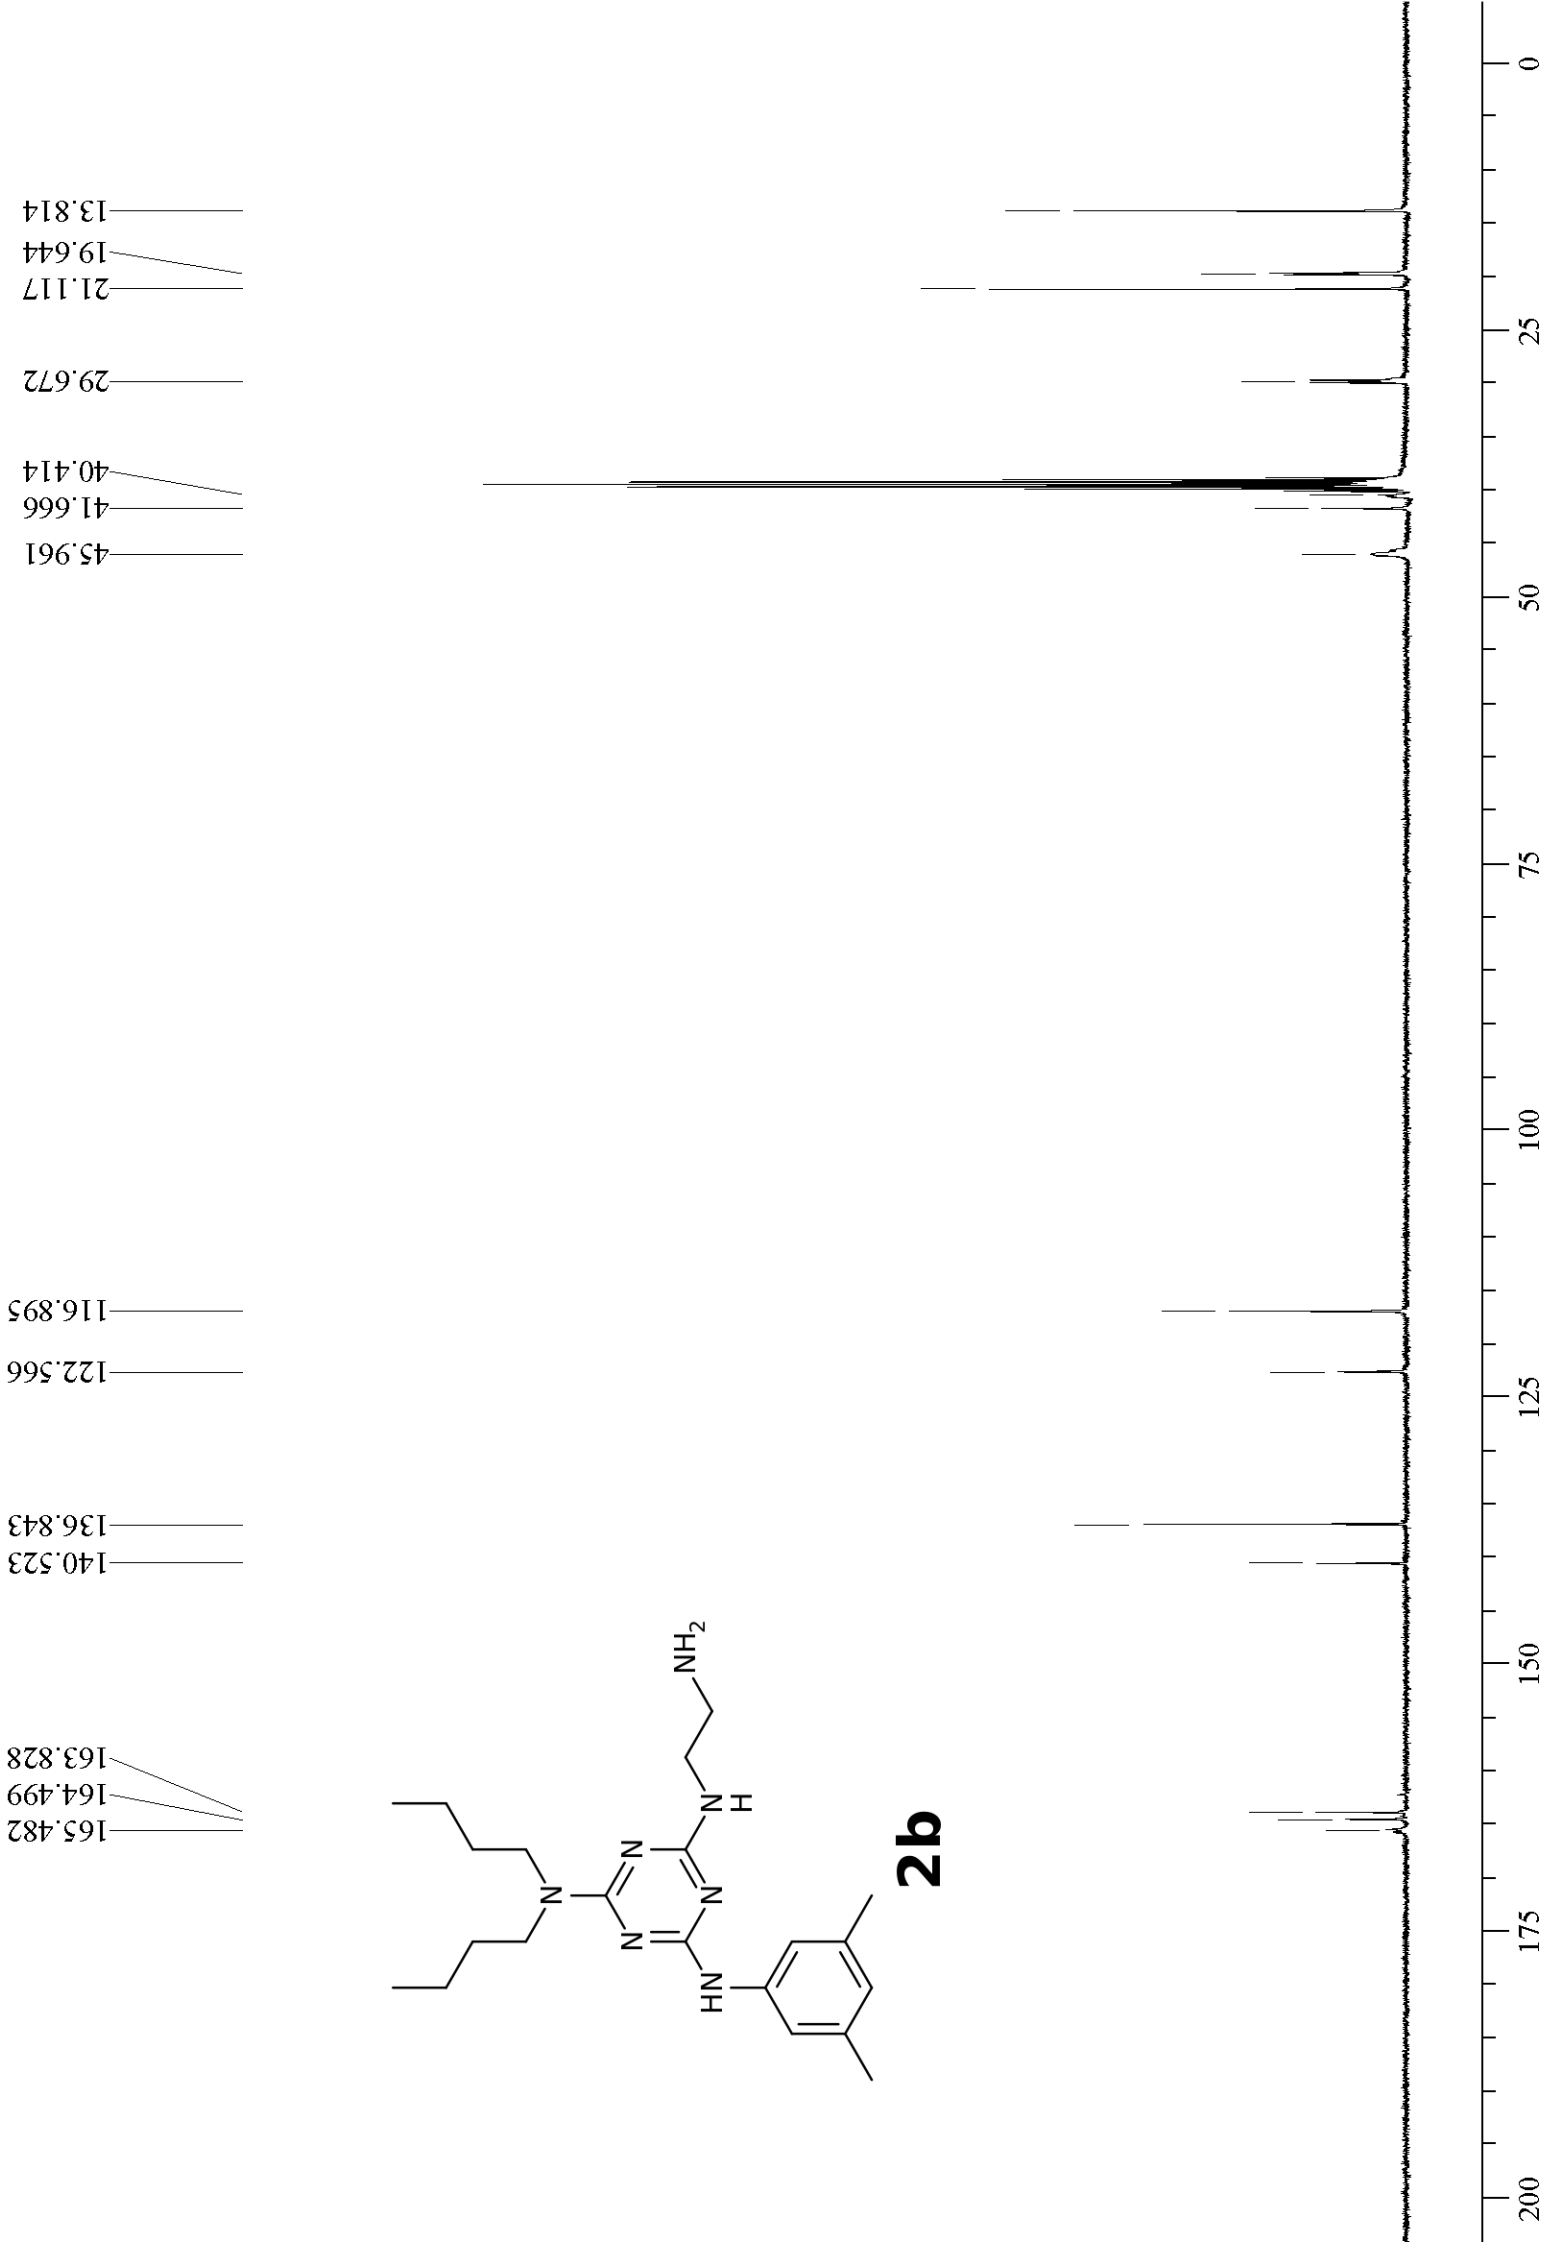

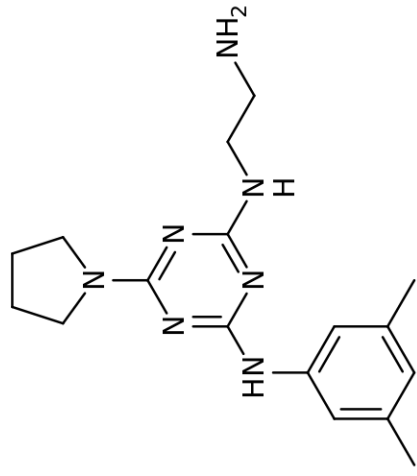

**2c**  
363 K

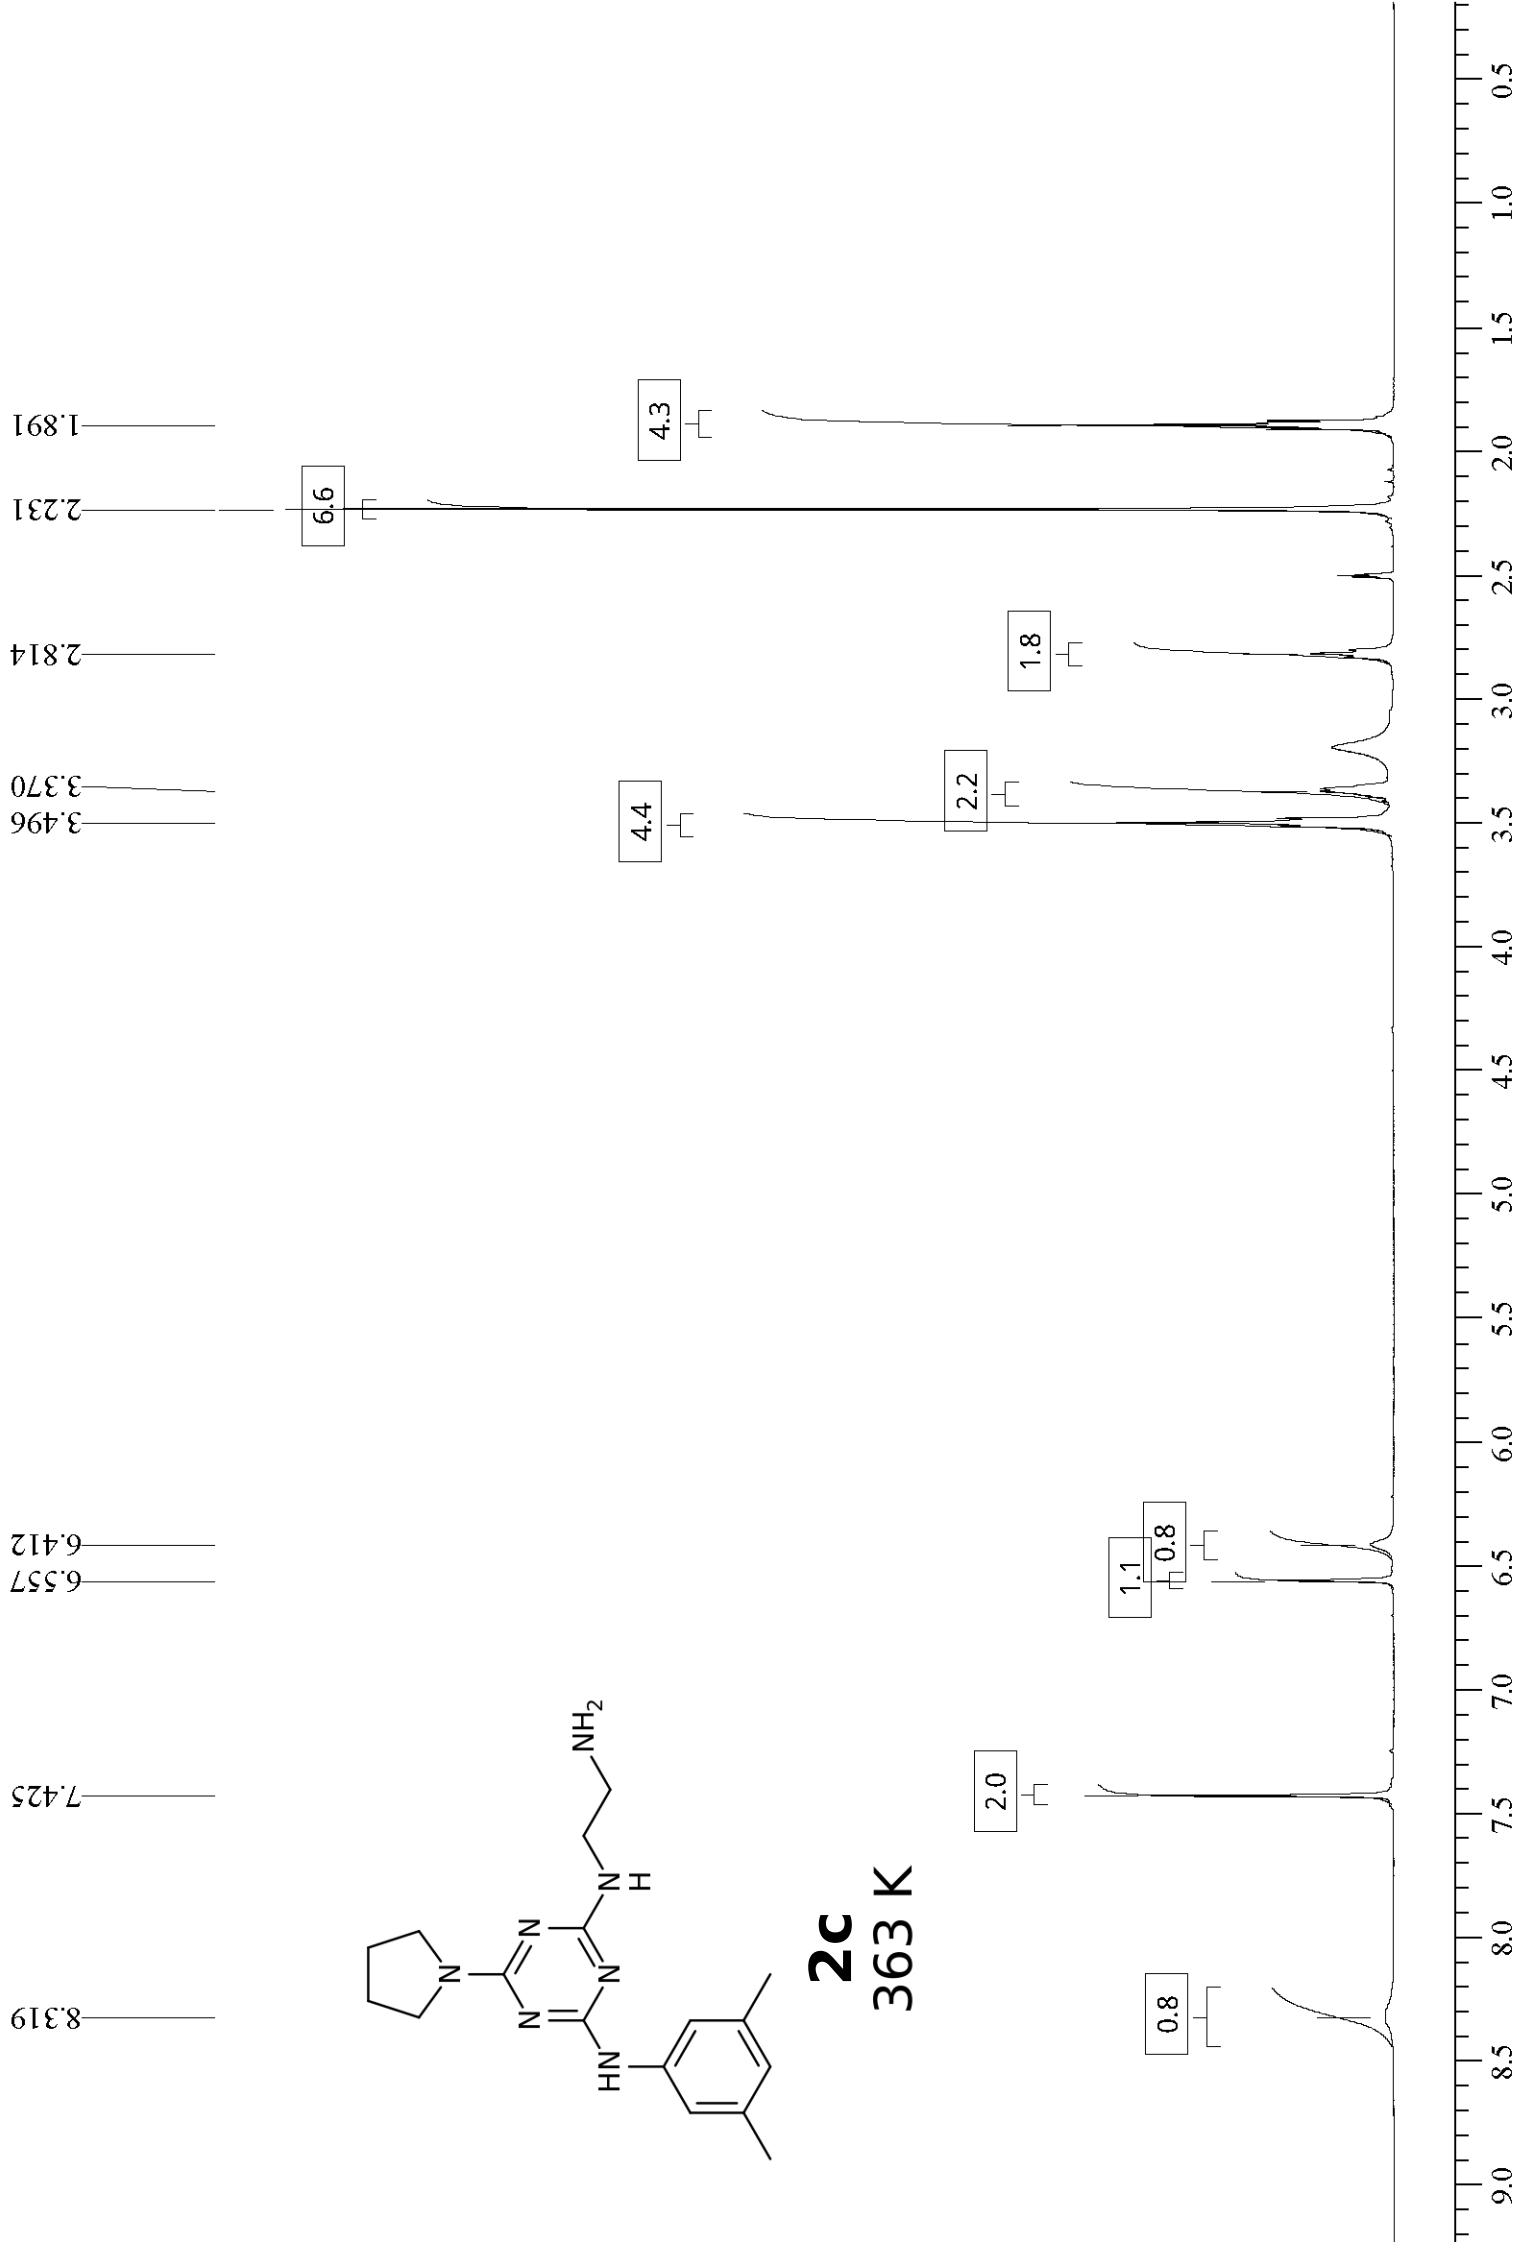

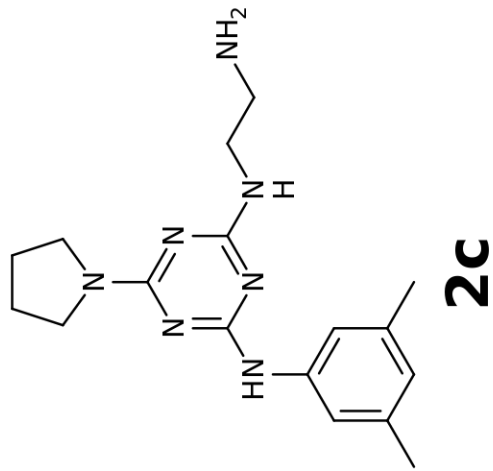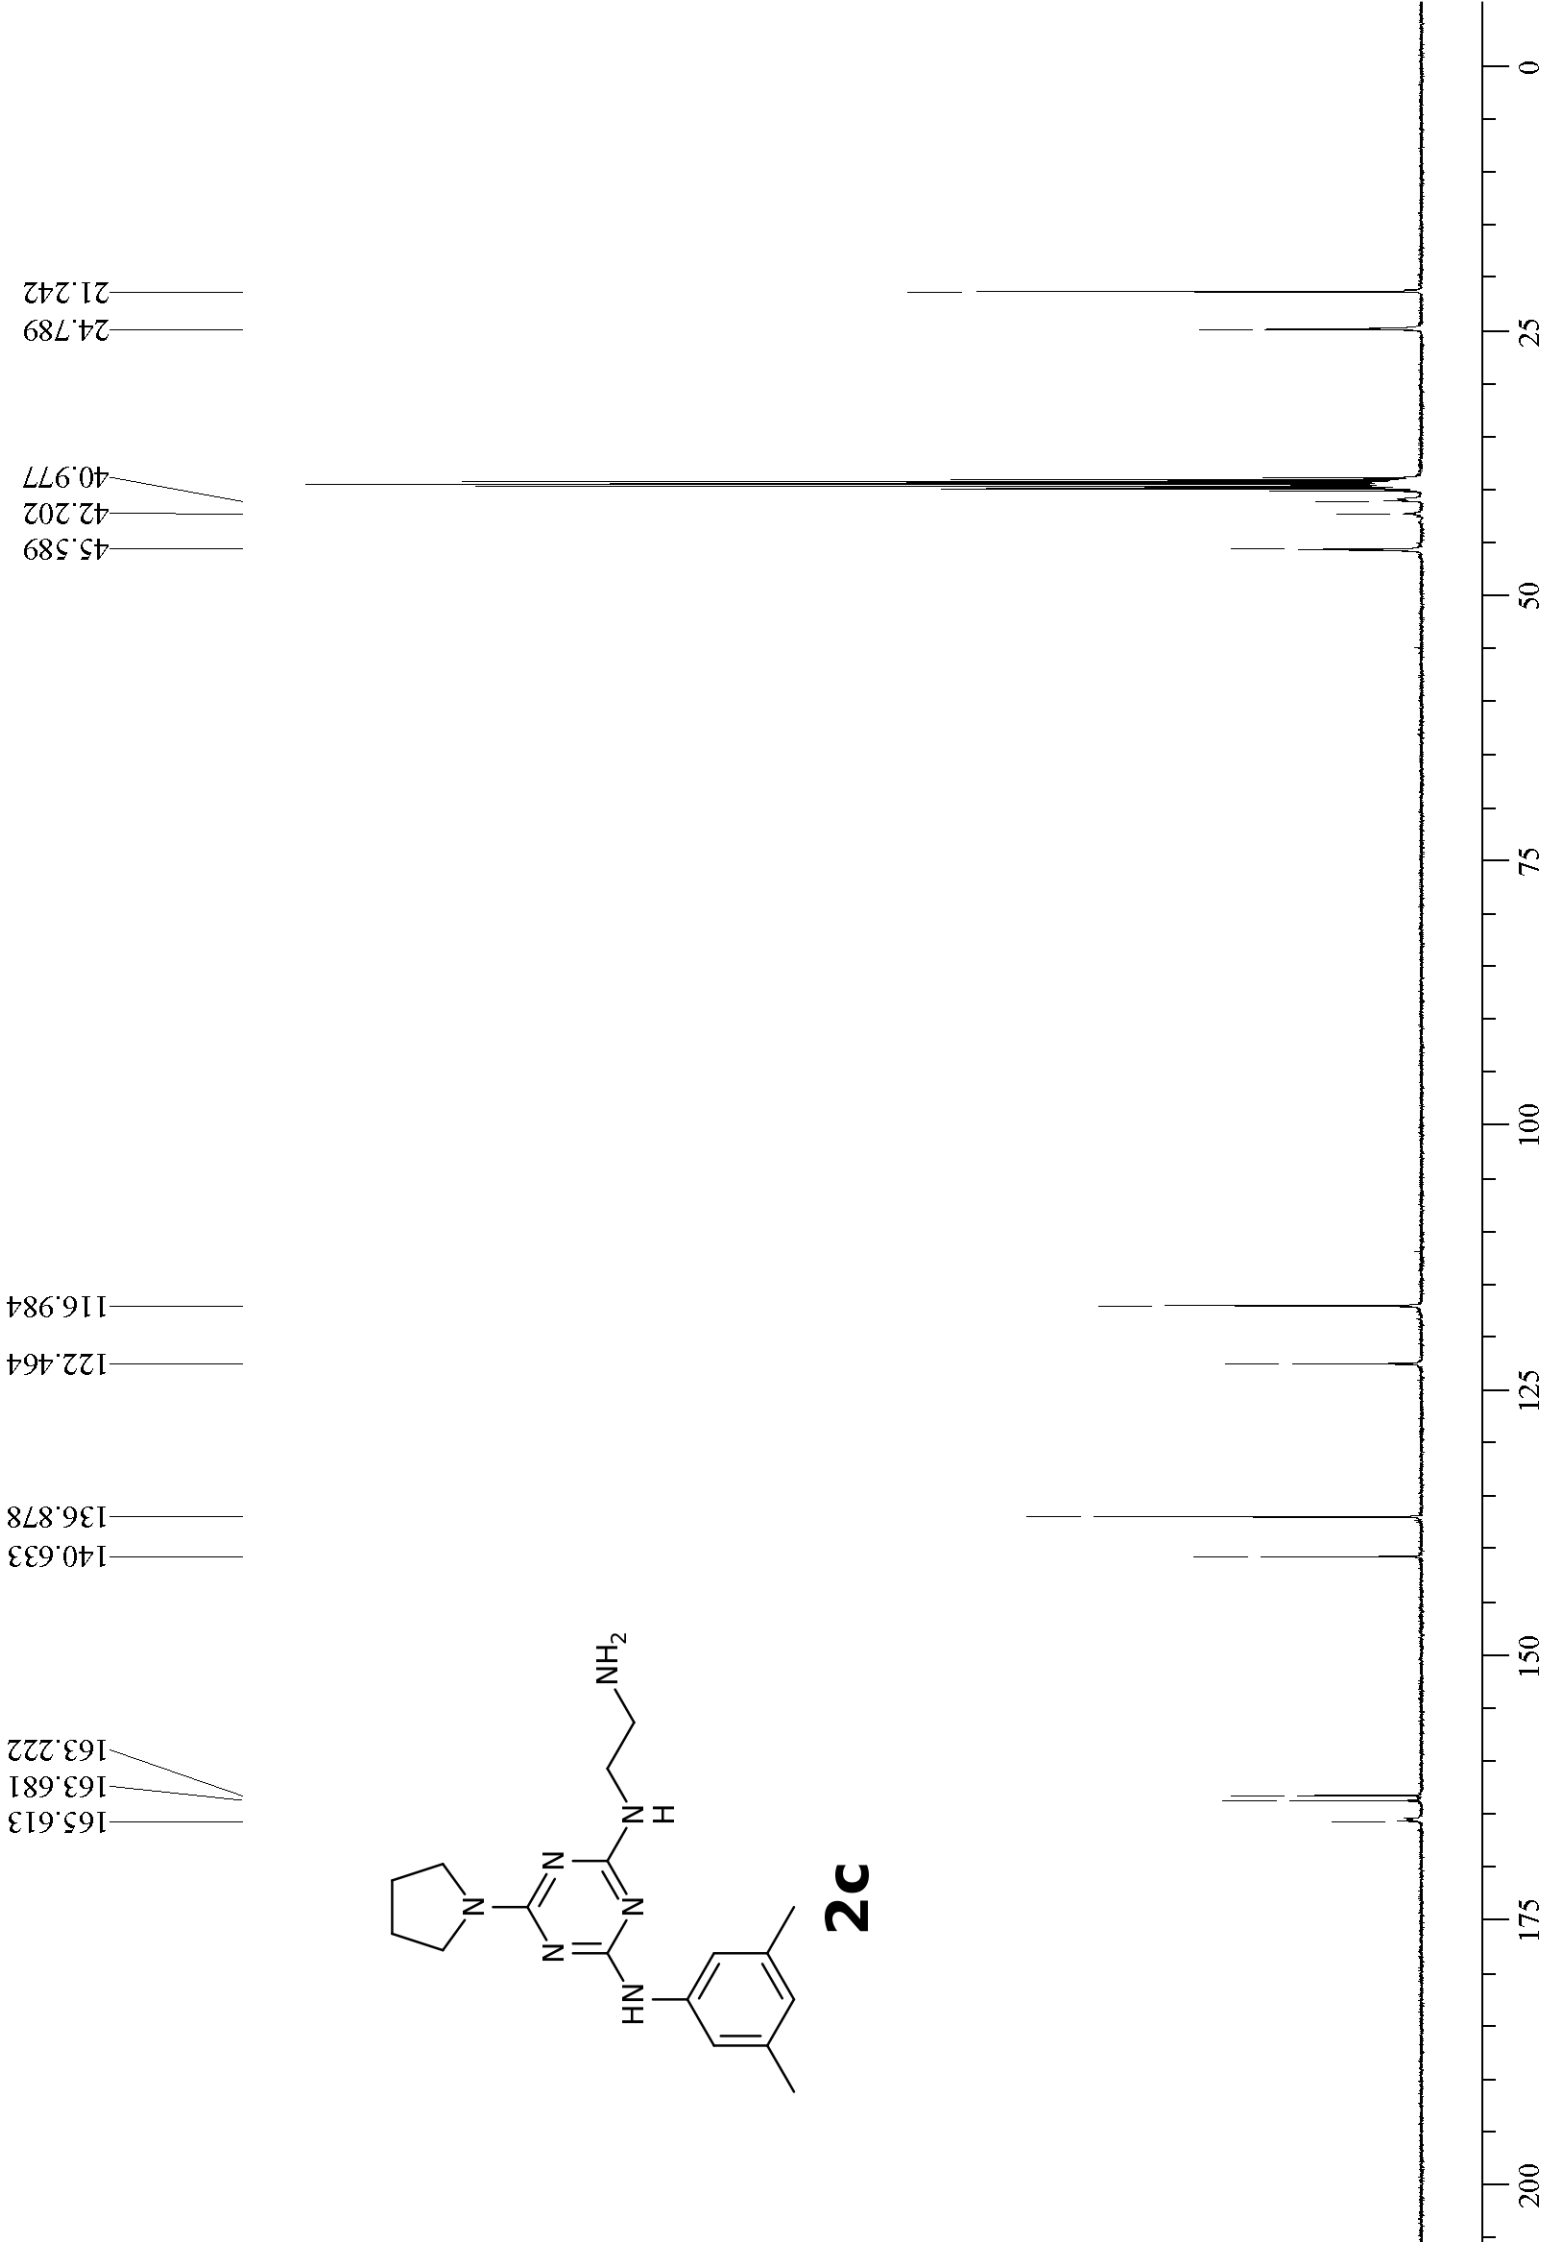

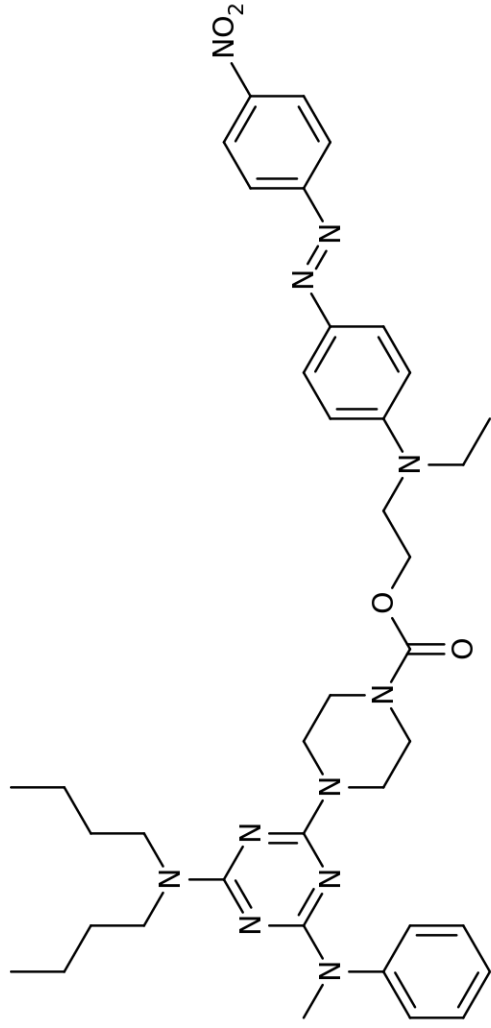

**gDR1-9 363 K**

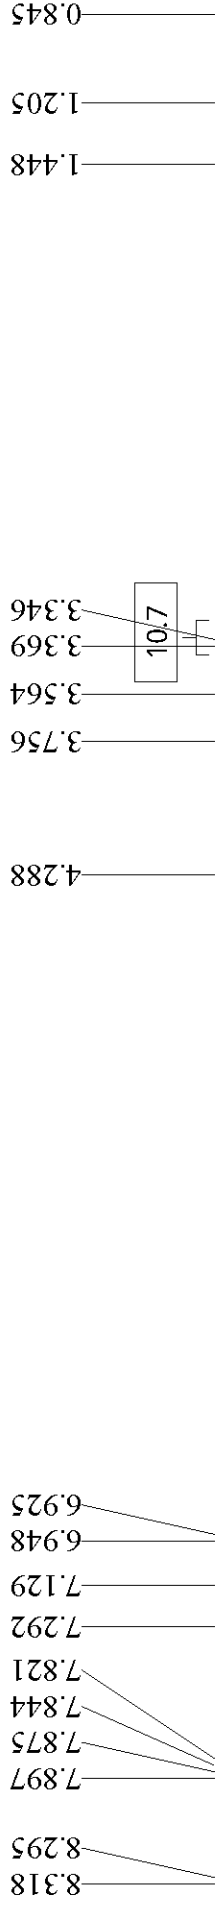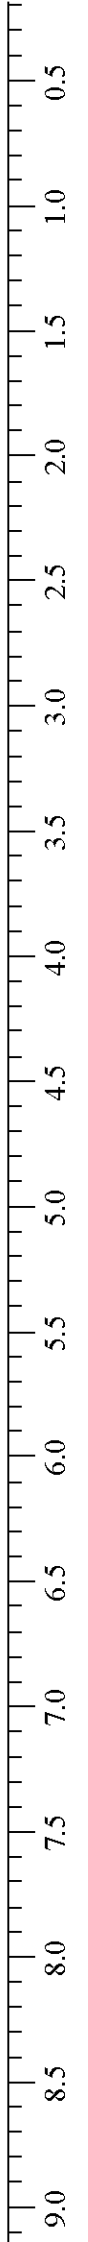

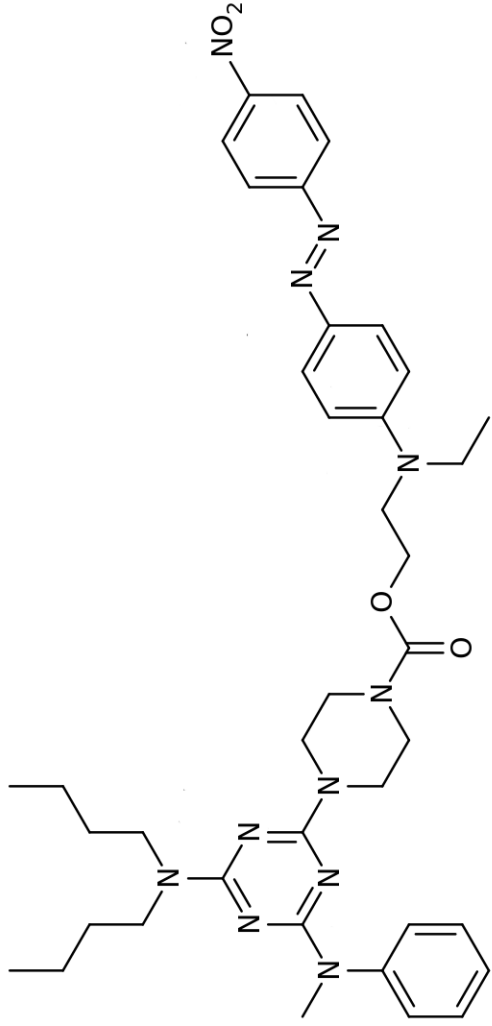

**gDR1-9**

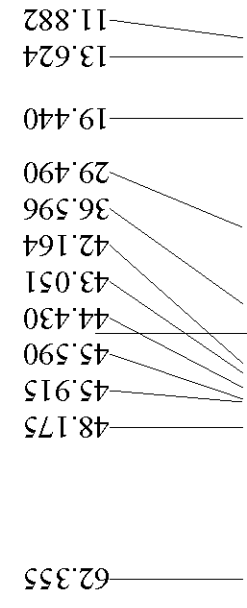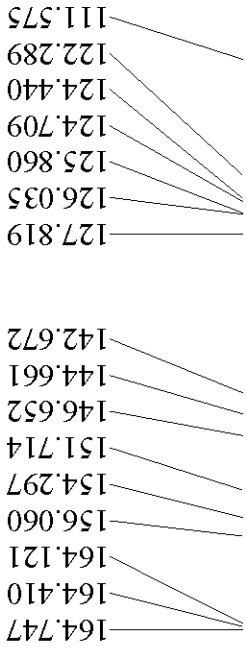

200

175

150

125

100

75

50

25

0

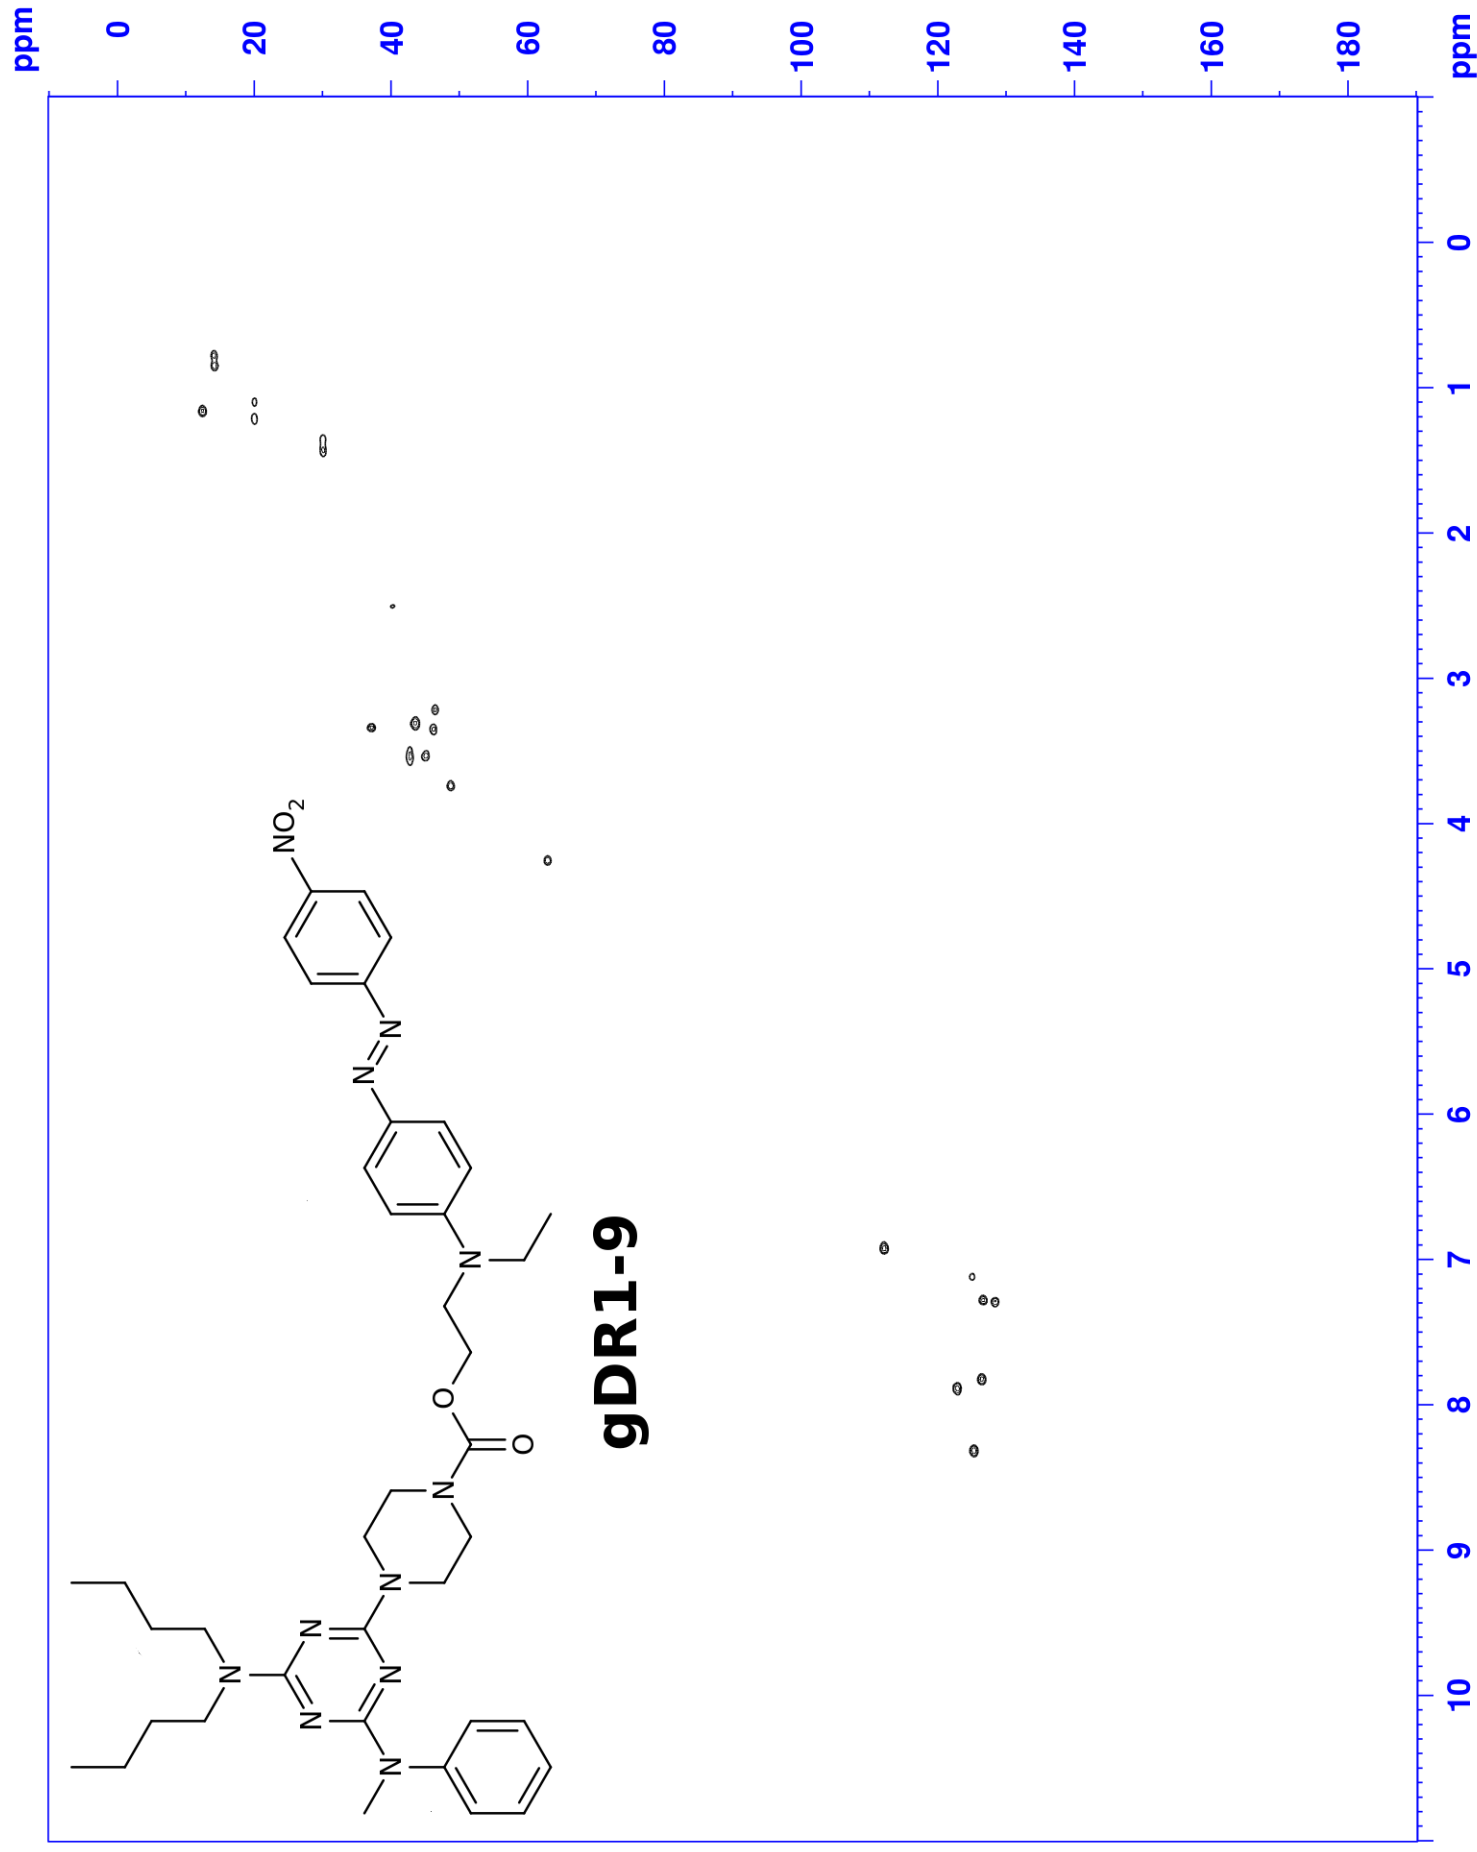

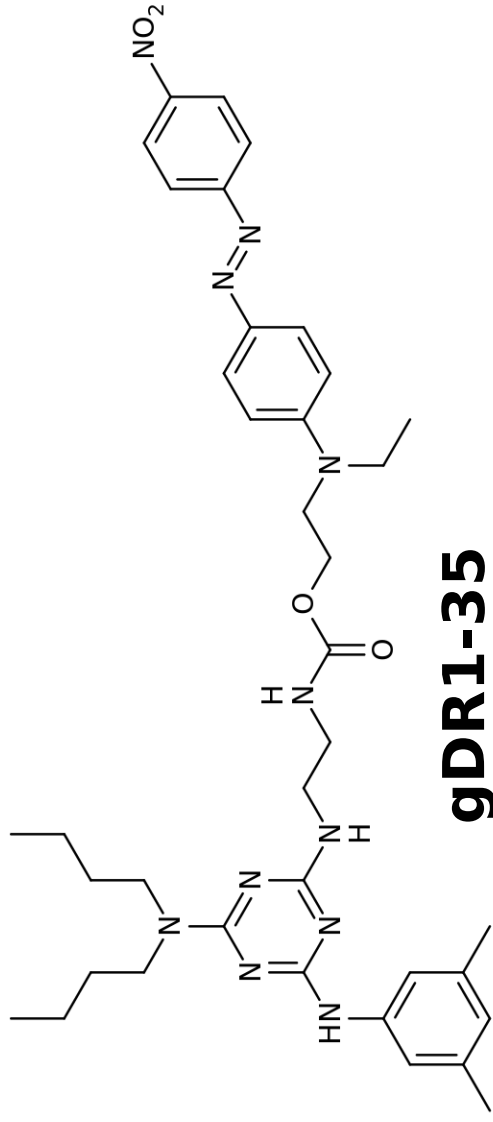

**gDR1-35**  
363 K

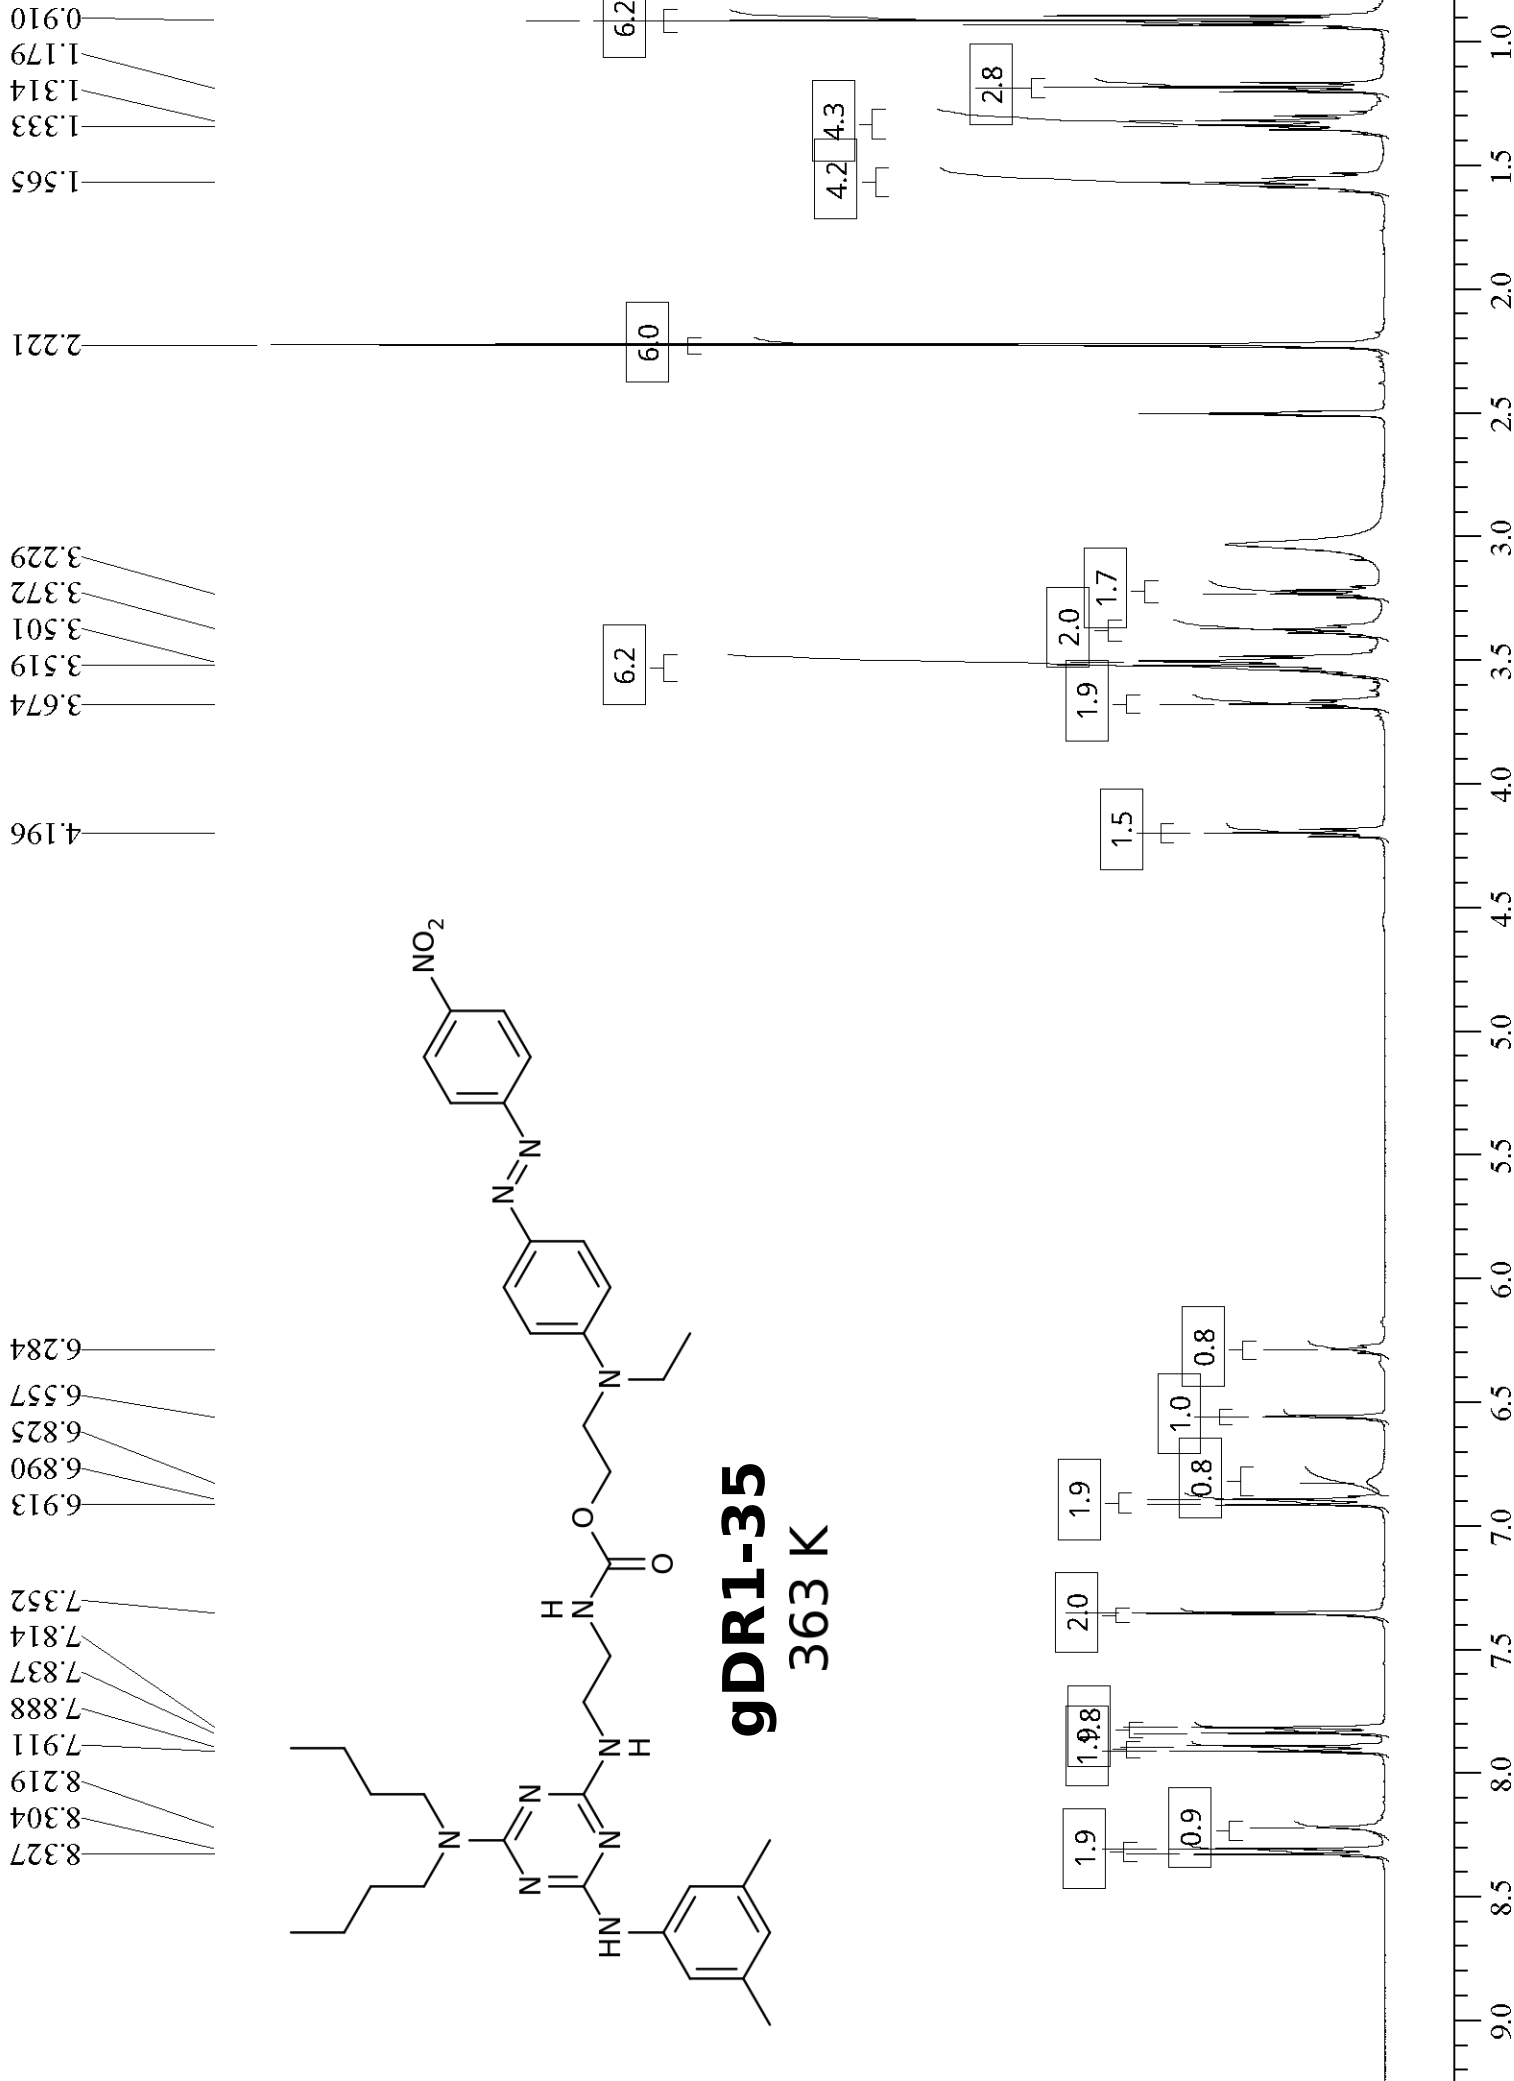

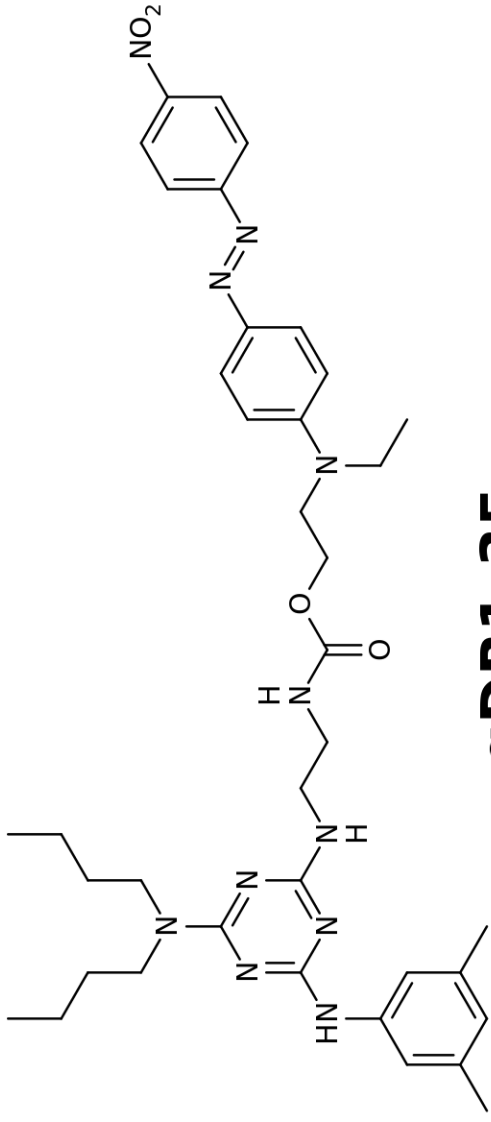

**gDR1-35**

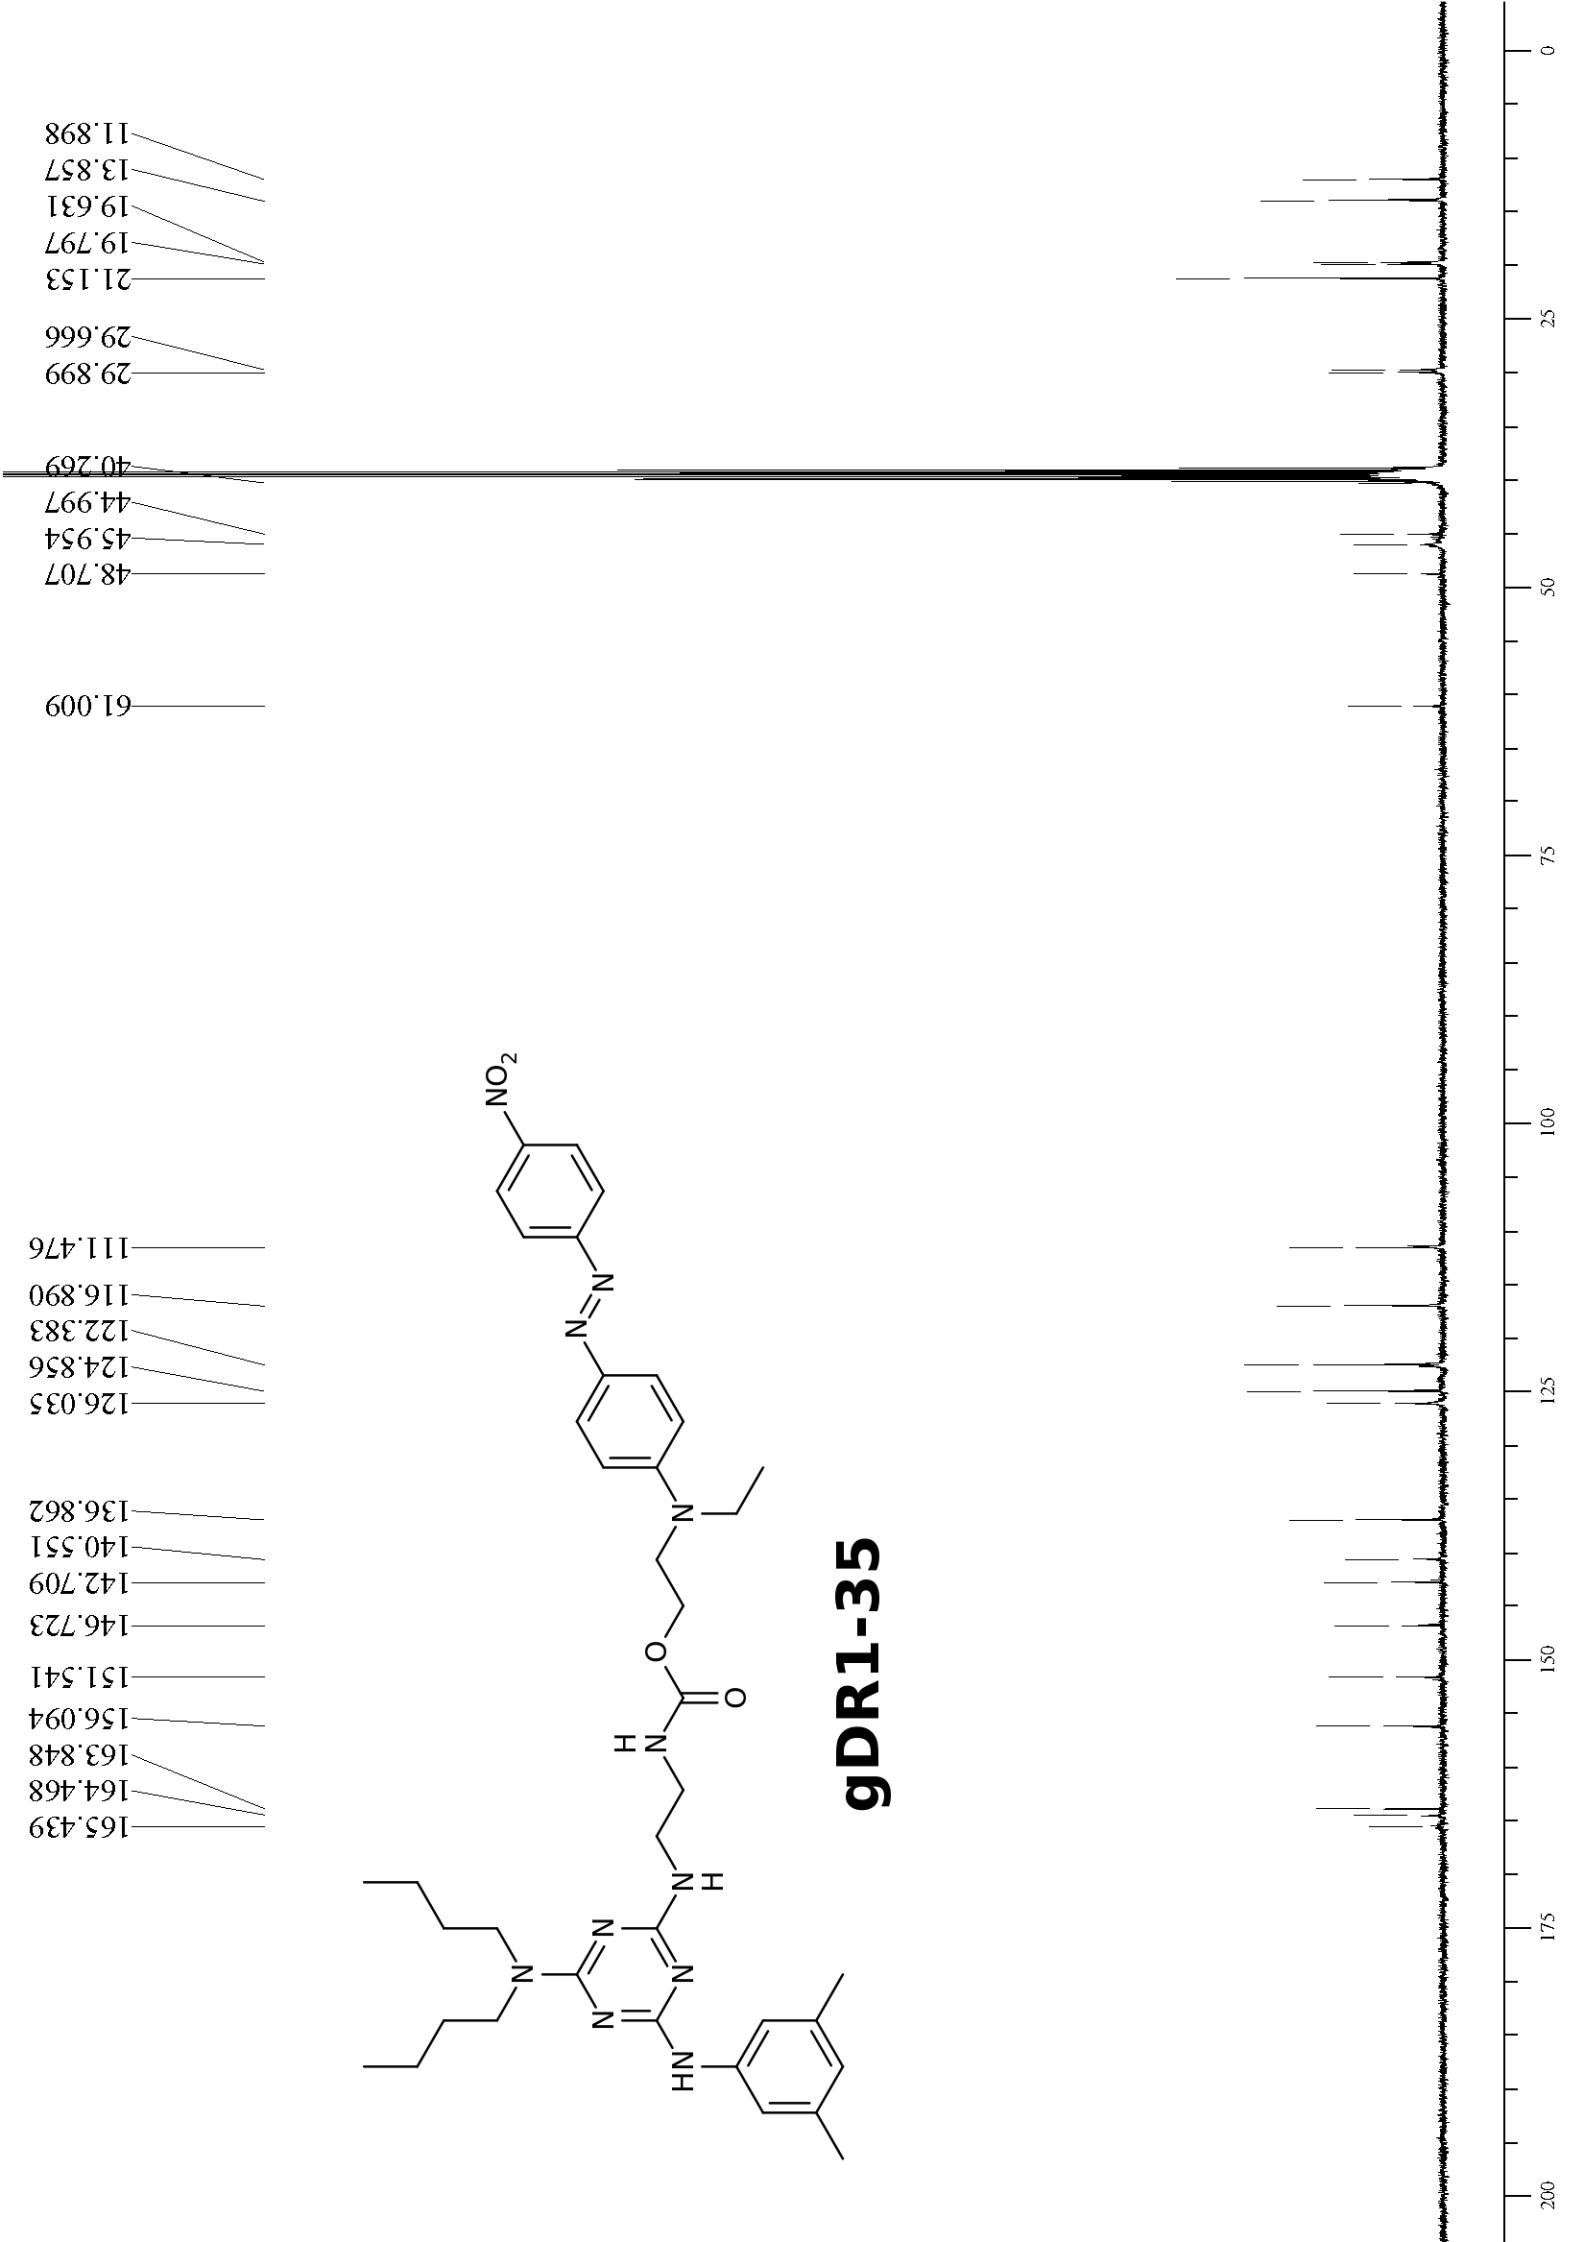



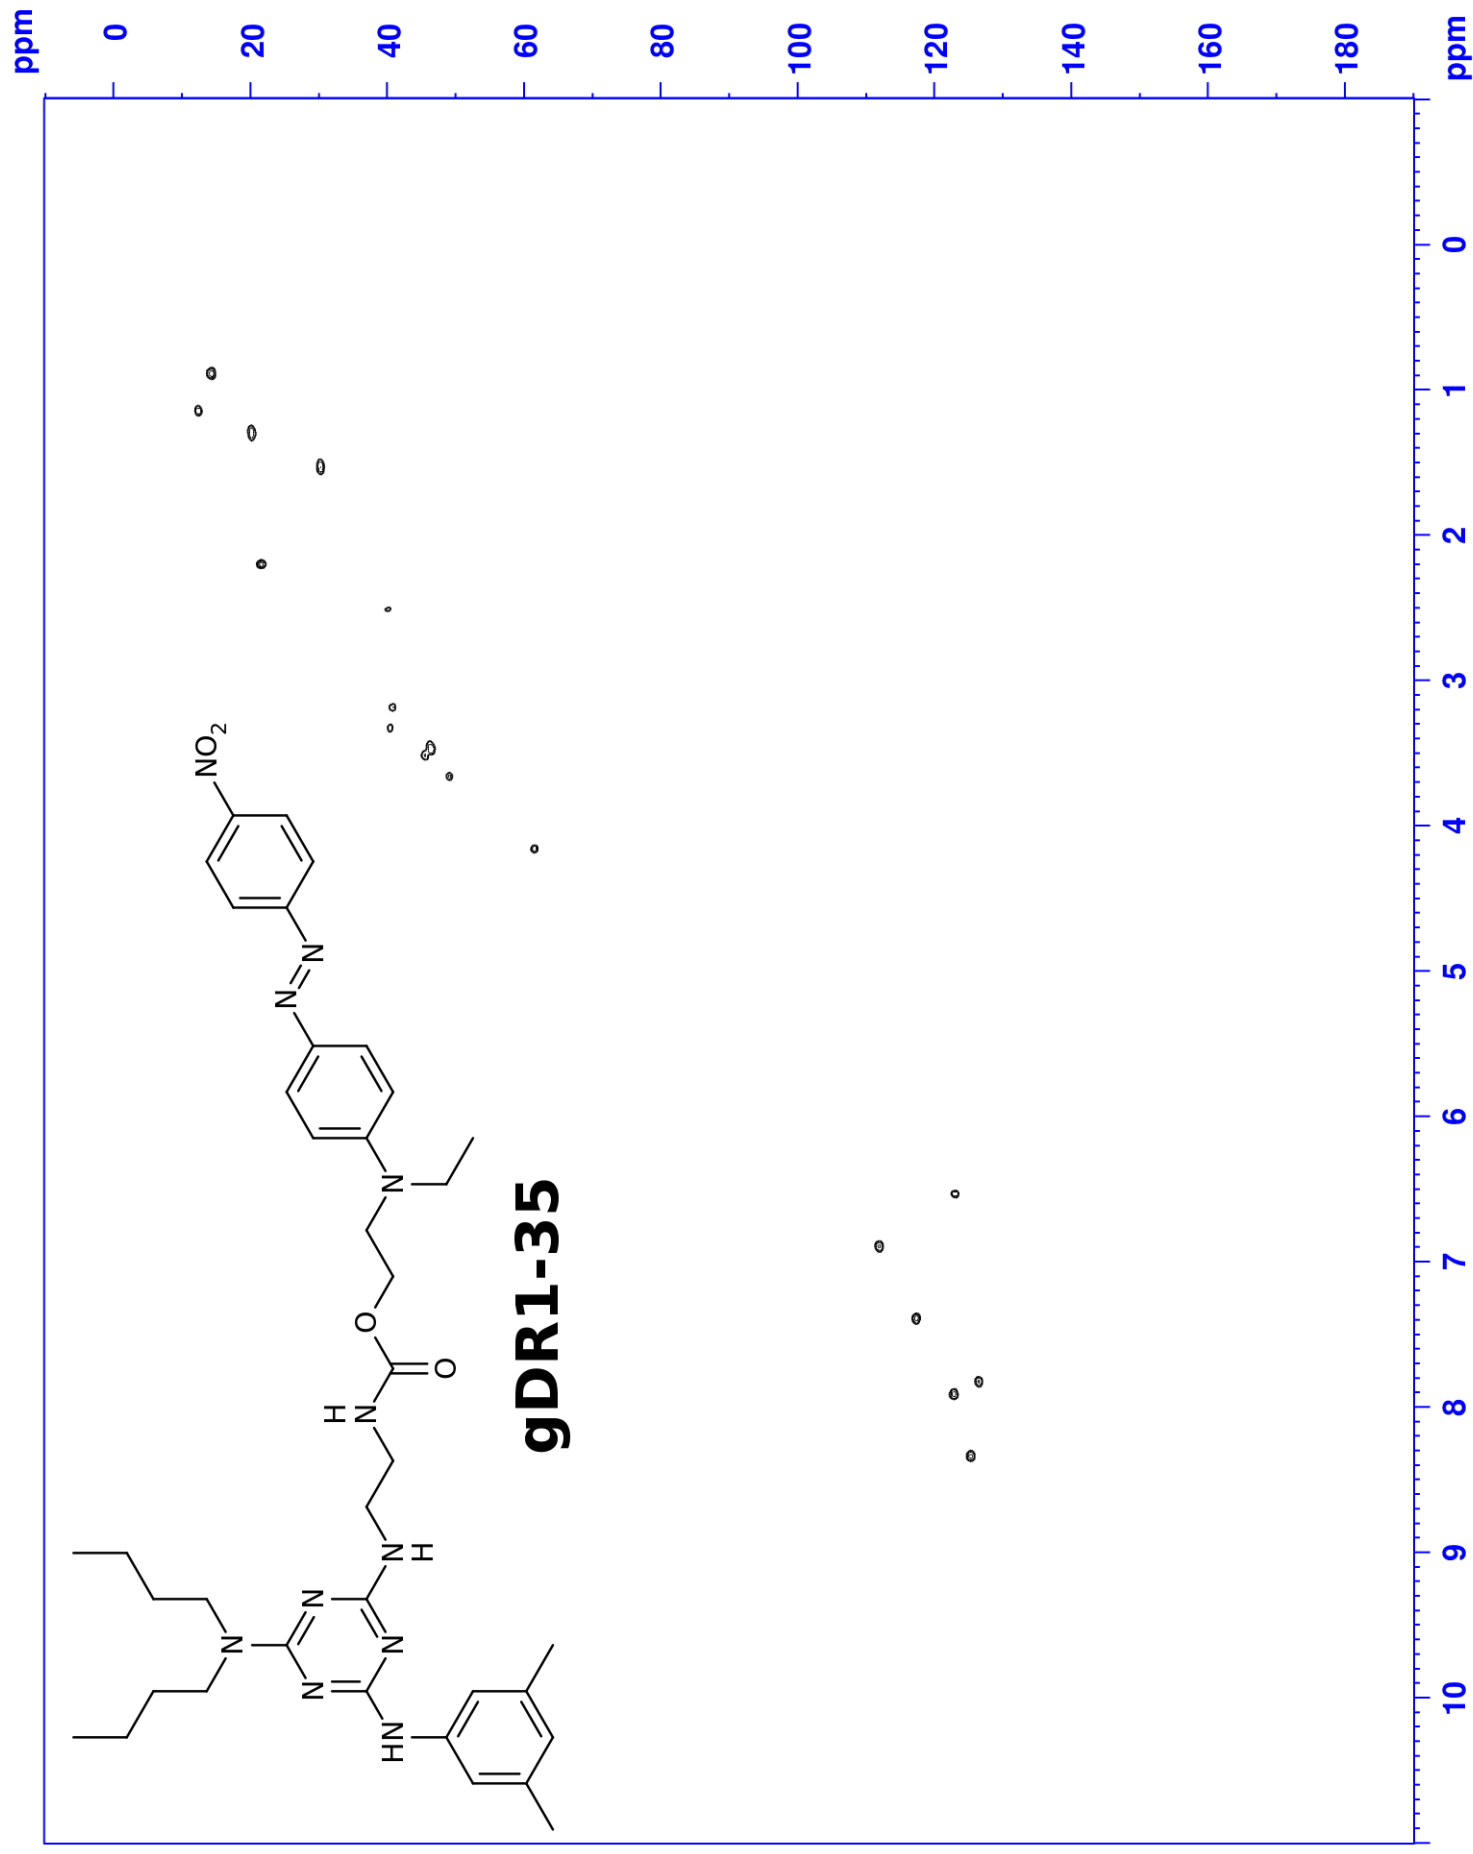

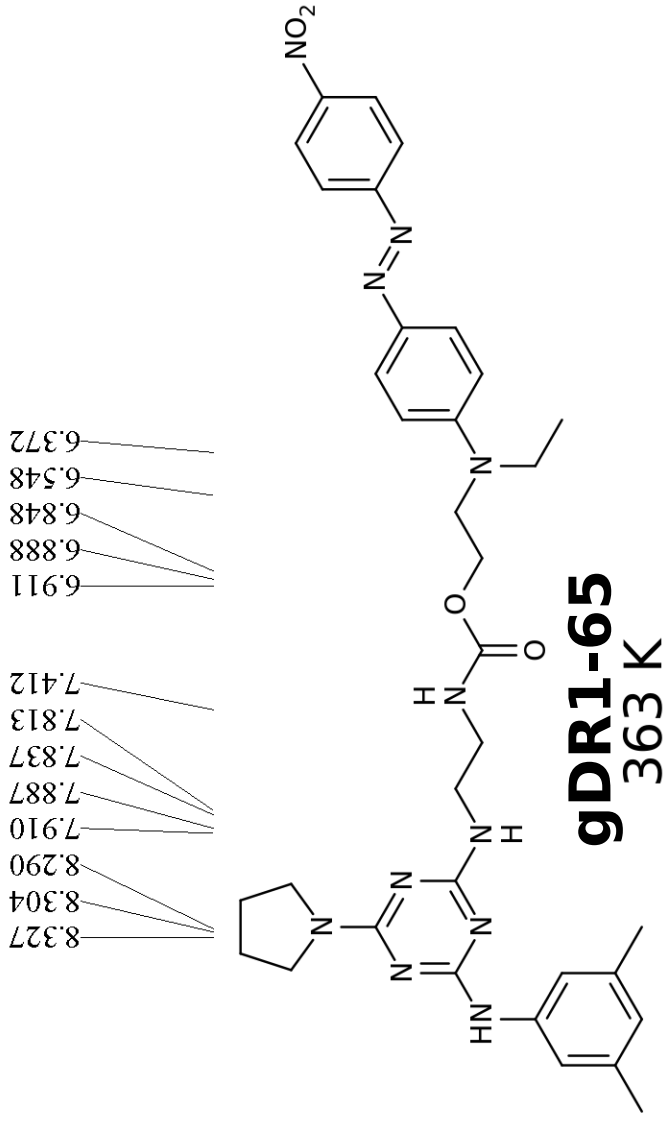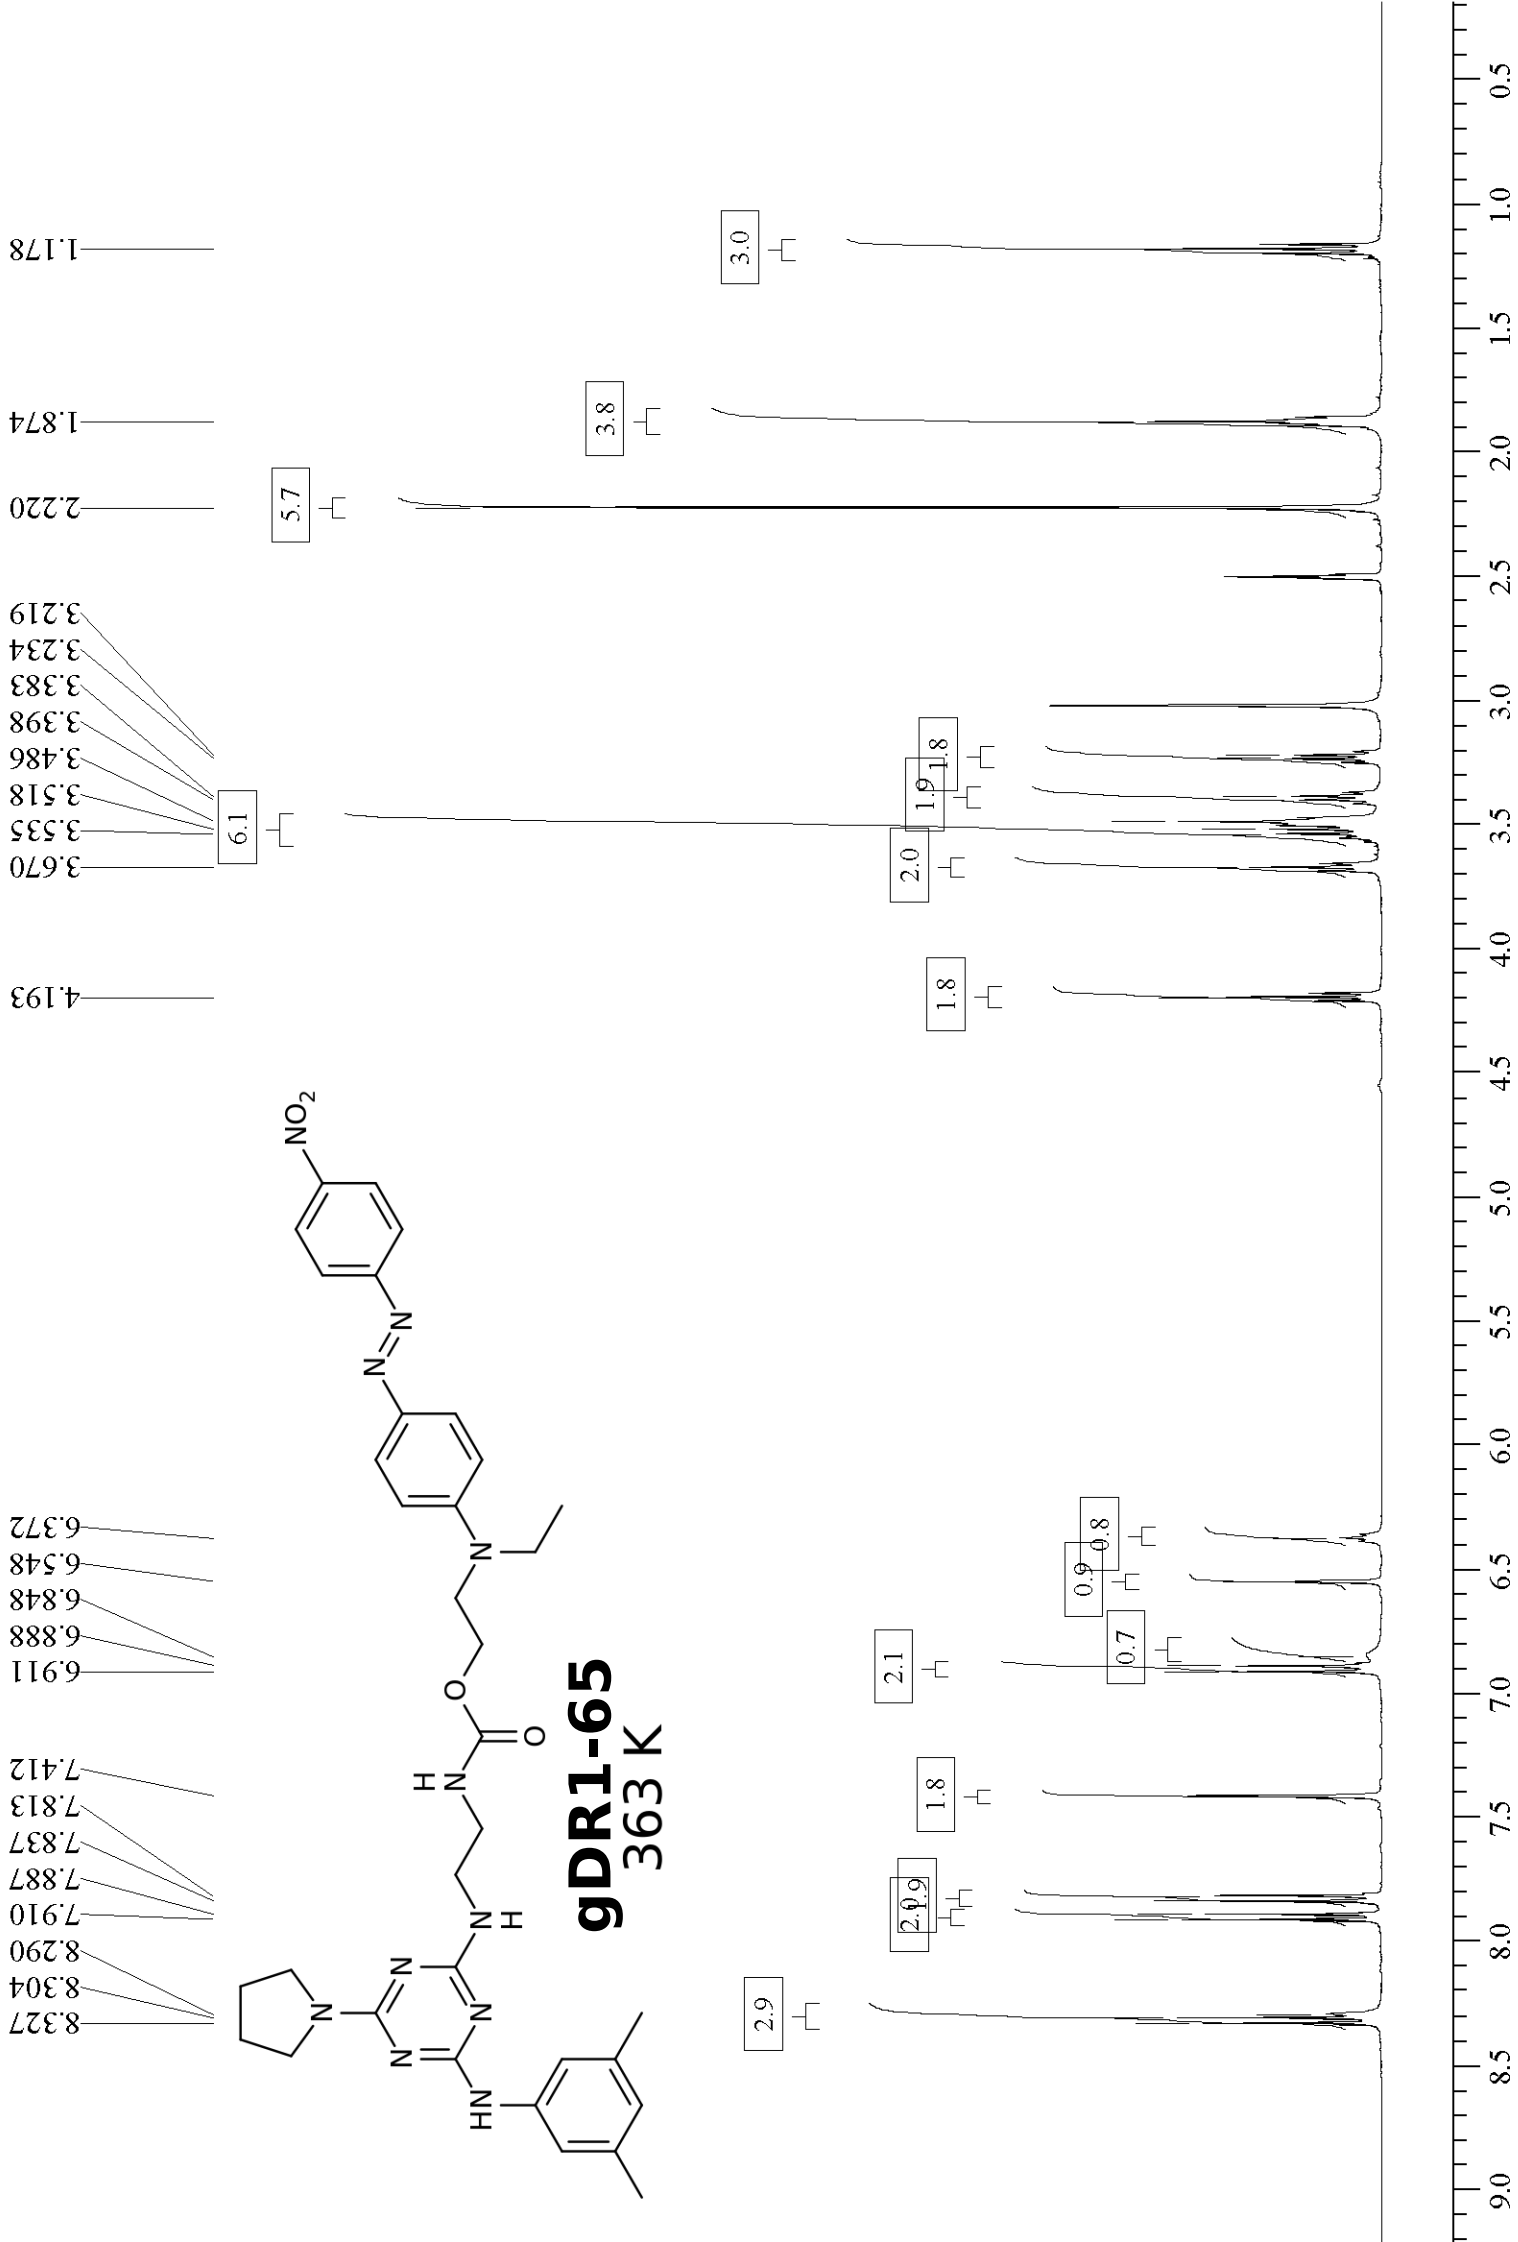

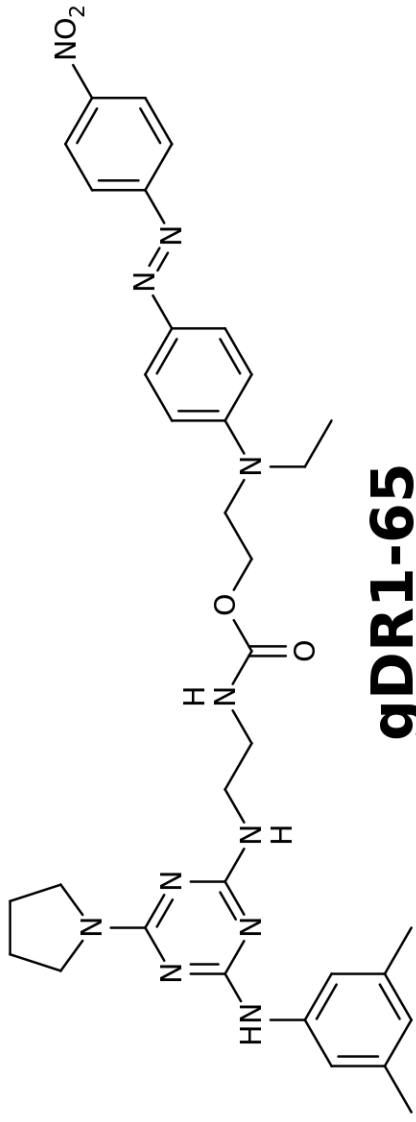

**gDR1-65**

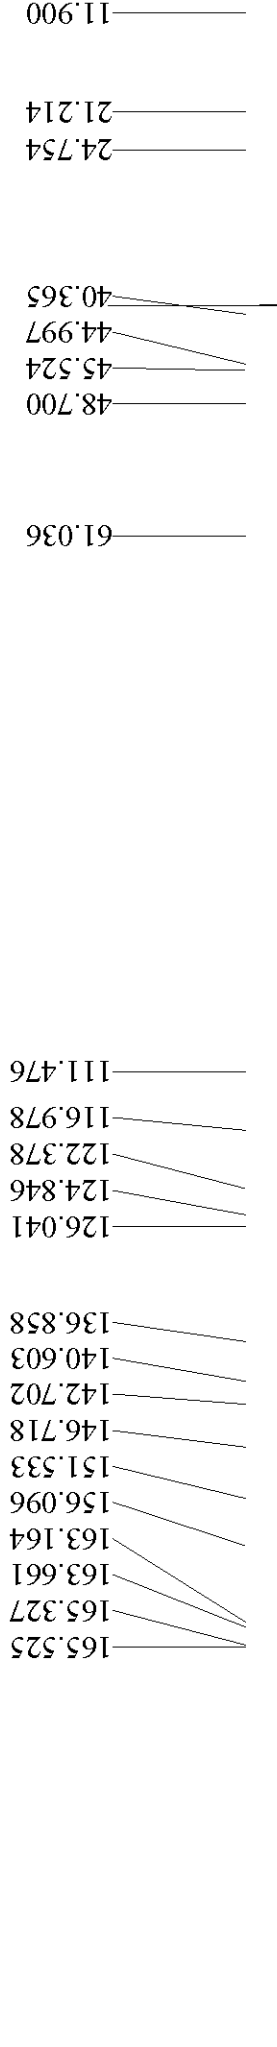

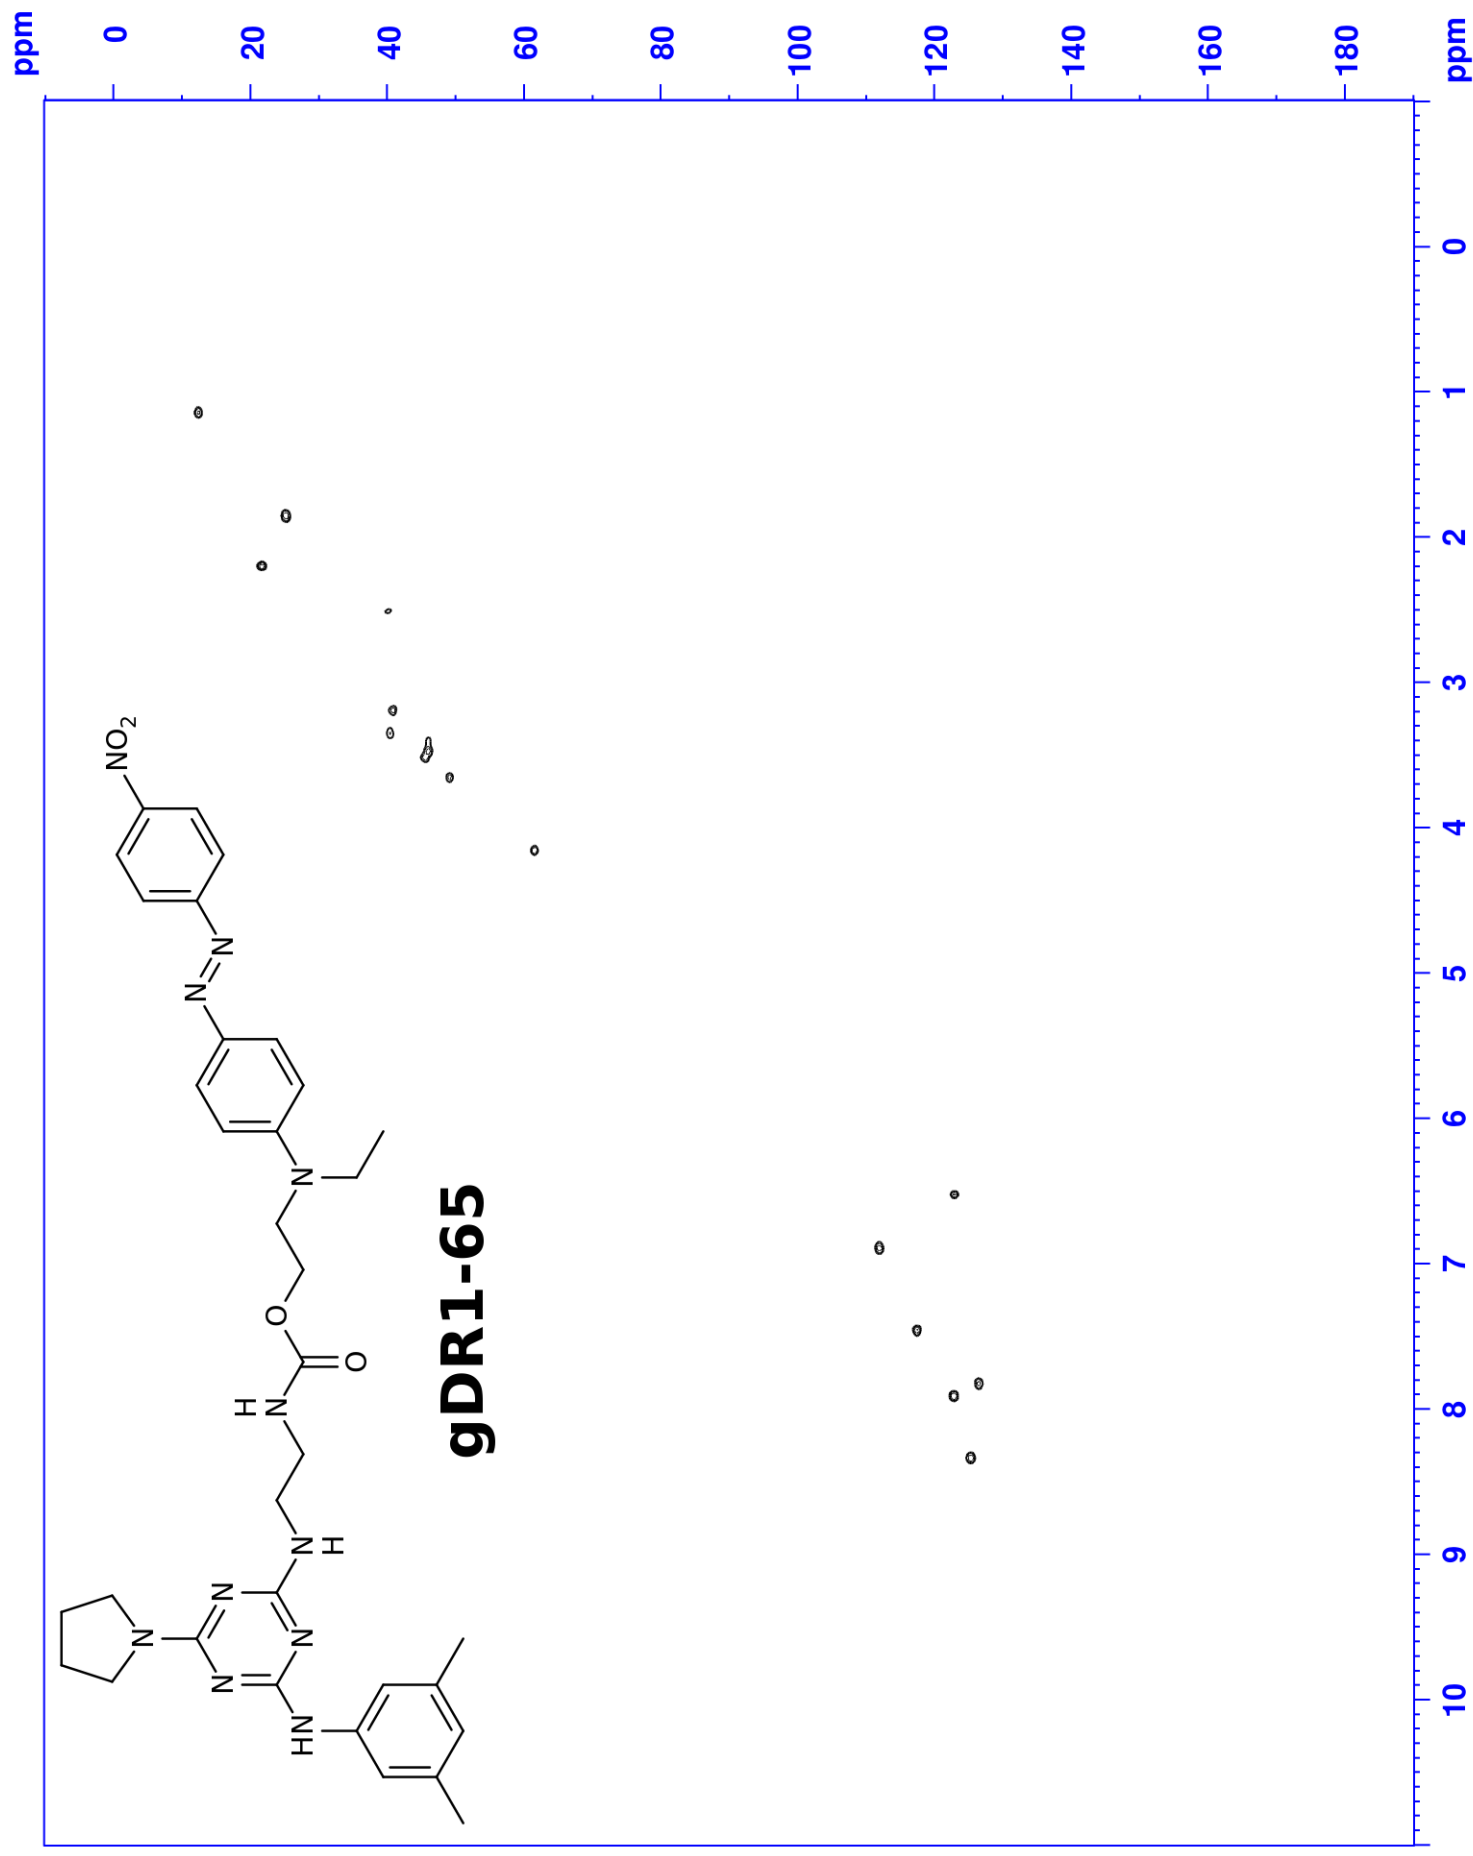

Supplement: d0tc00393j1.pdf [file d0tc00393j1.pdf]
